# A single cell RNA-seq resource for early sea urchin development

Stephany Foster, Nathalie Oulhen, and Gary Wessel\*  
Department of Molecular and Cellular Biology  
Division of BioMedicine  
Brown University  
Providence RI 02912 USA

\*corresponding author  
rhet@brown.edu

## Highlights:

1. We discovered 22 major cell states in late gastrulae of *Strongylocentrotus purpuratus* by single cell mRNA-seq.
2. Sub-clustering of the major embryonic domains reveals over 50 cell states with distinct transcript profiles.
3. The ectodermal, endodermal, and mesodermal germ layers each have multiple distinct cell states.
4. We found two cell states in the embryo expressing germline markers.
5. Many mRNAs thought to be exclusive to various cells types, are instead more broadly expressed.

**Abstract:** Identifying cell states during development from their mRNA profiles provides insight into their gene regulatory network. Here we leverage the sea urchin embryo for its well-established gene regulatory network to interrogate the embryo by single cell RNA-seq. We tested eight developmental stages in *Strongylocentrotus purpuratus*, from the eight-cell stage to late in gastrulation. We used these datasets to parse out 22 major cell states of the embryo with focus on key transition stages for cell type specification of each germ layer. Sub-clustering of these major embryonic domains revealed over 50 cell states with distinct transcript profiles. Further, we identified the transcript profile of two cell states expressing germ cell factors, one we conclude are the primordial germ cells, and the other transiently present during gastrulation. We hypothesize that these cells of the veg2 tier of the early embryo may represent a lineage that converts to the germ line when the primordial germ cells are deleted. This broad resource will hopefully enable the community to identify other cell states and genes of interest to expose the underpinning of developmental mechanisms.

## Introduction

How cells of a developing organism change relative to each other is key to understanding embryogenesis. Important regulatory steps for developmental change may include various intersections with the central dogma of molecular biology, so testing diverse organisms is essential to reveal conserved principles in development, and nodes in which evolutionary change has occurred. While the functional end product of gene expression is the driving force of change, whether it is a protein, metabolites, or other biochemistry, it is usually very difficult to see such specific activities with current technologies. Instead, investigators focus on DNA and RNA polymers since they can be analyzed specifically through their sequence, and be amplified for remarkable sensitivity.

Single cell RNA-seq technology combines advances in microfluidics, and nucleic acid biochemistry to identify genes expressed within cells on a cell-by-cell basis (Klein et al., 2015; Macosko et al., 2015). By capturing mRNAs through oligo-dT annealing on a bead within an oil droplet, one rapidly constructs cDNA with individualized barcoding so that upon mixing the many beads, each representing a single cell, the investigator can back calculate the sequenced mRNAs and their relative abundance from each cell. By then comparing the overall content and abundance of mRNAs in each cell, clusters are parsed out into more/less similarity distinguished by their steady-state transcript accumulation from which gene expression is concluded. The strengths of such technology include readouts of mRNAs from potentially thousands of cells of a single embryo for direct, side-by-side comparison of the constituents. Shortcomings of the approach though are that spatial interpretation requires known markers by in situ hybridization, and less depth in sequencing than in traditional bulk RNA-seq.

Here we take advantage of the ability to dissociate sea urchin embryos into single cells to parse out cell states based on patterns of mRNA accumulation using scRNA-seq technologies. With this approach one might identify distinctions in genes expressed in each cell state that enables greater depth in analysis of gene regulatory networks. Echinoderms are the lone invertebrate deuterostome and their members are an important model for establishing gene regulatory networks through experimental templates to understand the drive in development and differences between cells. The ready dissociation of echinoderm embryos into single cells has been used in many applications to identify unique gene expression (Bruskin et al., 1981; McClay and Marchase, 1979), specific cell adhesion mechanisms (Fink and McClay, 1985), cell fate changes (McClay et al., 1977), and many other important principles of development. Recently a proof of concept experiment was reported using sea urchin embryos analyzed by scRNA-seq (Foster et al., 2019). Two sibling populations of dissociated cells were analyzed at one time point (early gastrula), the only difference being presence or absence of an inhibitor (DAPT) of the Notch/Delta pathway during development and prior to dissociation. Remarkably, all cell clusters were overlapped in these two populations except for one lineage, the Veg2 lineage that contributes to endomesoderm. This lineage is known to be a target of the Notch/Delta pathway during development. The reproducibility of these results encouraged us to perform a broad and inclusive analysis of cells during development from cleavage stages to late in gastrulation. These developmental time points have been most intensively studied and form the basis for the gene regulatory network in this animal [<http://www.echinobase.org/endomes/>].

Of particular interest to us are the primordial germ cells (PGCs), the stem cells that give rise to eggs and sperm. These cells are formed in the sea urchin at the 32-cell stage, after 2 sequential, asymmetric divisions. These presumed PGCs promptly differ significantly from their sibling somatic cells. For example, while the somatic cells continue to divide rapidly, the 4 PGCs become mitotically quiescent shortly after they are formed and they will divide only once until after gastrulation, resulting in an embryo of 8 PGCs versus over 1000 somatic cells. In addition to the down regulation of their cell cycle, the PGCs also reduce their

transcription, translation, and mitochondrial activity to less than 10% of their somatic counterparts. We discovered that this dramatic quiescence is temporary; the PGCs restart their activities after gastrulation. These transitions serve mightily as a rapid, predictable, and transient quiescent phenotype although their transcript profile during this period is not known. In the sea urchin, the RNA-binding protein, Nanos2, is essential for maintaining PGC quiescence and survival, and the turnover of Nanos2 in these cells is correlated with a return to full metabolic activity (Fujii et al., 2009; Juliano et al., 2010; Oulhen et al., 2017).

Here we report on the changes of cell states from the 8-cell stage to late gastrulae using single cell mRNA-seq technology in the embryo of *S. purpuratus*. We use the term *cell states* here instead of *cell types* for the compelling reason that technology has exceeded observational distinctions (Klein, 2017). Distinctions in transcript profiles outnumber the classic definition of cell types, which is necessarily limited when one considers lineage variations and boundaries between lineages. Instead, *cell state* refers to populations of cells that show distinctions in transcript accumulation which may or may not be reflected in the functional endpoint of the cell. The term *cell state* is also distinct from *regulatory state*, the term used for the profile of transcription factors in each cell. We find 22 major cell states in late gastrulae and report on cell states in each of the three primary germ layers and in the cells that we posit form the germ line.

## Results:

### Single-cell mRNA sequencing of developing sea urchin embryos

Sea urchin embryos were cultured and collected for single cell RNA sequencing analysis via DropSeq using the 10x Genomics platform. Our analysis included eight time points spanning early development, from three hours post-fertilization to late gastrula stage (Table S1), selected based on dynamic features of cell fate changes anticipated by candidate-based studies. The datasets from all eight time points were integrated and clustered to identify cell states and cell state markers present across early development using Seurat (Butler et al., 2018; Stuart et al., 2019). In total, the transcriptomes of 60,399 cells were included in our analysis. Here we identify cell states of the sea urchin arising from the three germ layers: ectoderm, endoderm, and mesoderm. Upon integration of the datasets and visualization with tSNE dimensionality reduction, we identify 22 major cell states, including the germline (Fig. 1A), based on known marker gene expression (Table S2). These 22 major clusters can be further segregated to reveal regions within the digestive system, distinct ectoderm cell states, and diverse blastocoelar populations (Fig. 1B and S8). The identification of 22 clusters is a direct result of the resolution parameter used in the clustering step of the analysis. The resolution used of 0.5 is a conservative setting whereas increased resolution resulted in 58 separable cell states (Fig. 1B). Here we characterize each of the major 22 clusters, which are well annotated cell states of the sea urchin embryo, and since no resolution is optimal for each cell type, we show results from sub-clustering of each of the major cell populations.

We first tested consistency in the single cell sequencing approach for this animal. While the cost of dropseq runs and sequencing is very high, we were able to test the same species at the same developmental time in two experiments separated by one year. Our first scRNA-seq experiment showed lineage-specific effects of cell signaling by treating the embryo with small molecule inhibitors (Foster et al., 2019). The control in that experiment was replicated here, one year later, and was closely correlated in this new dataset as shown by cluster positioning, gene markers of each cluster, and regression analysis of the transcripts identified in each experiment (Fig. S1). We saw strong correlation between both datasets across the computationally derived clusters, which led us to conclude that this approach is highly replicable. The consistency of output appears to be of high fidelity even with the

variation in numbers of cells, in depth of sequencing, as well as differences in developmental timing between these wildtype embryos.

In analyzing the eight developmental datasets, differences between early and late time points were apparent. We detected a range of 2,000 to 7,000 genes per cell of embryos collected between 8- to 64-cell stage. In contrast, we detected on average fewer than 2,000 genes per cell in blastula and gastrula stage cells (Fig. S2). Overall, we observed a downward trend in the number of unique transcripts detected per cell as development progresses (Fig. S3). This change could be explained by 1) a progressive decrease in mRNA content (cell volume) with embryogenesis, 2) differing depth of sequencing for each time point, 3) an overall decrease in maternal mRNAs present in the early embryo (Swartz et al., 2014), and/or 4) that cells have reduced potency during development and acquire specialization in their steady-state mRNA expression. This later type of mRNA change can be quantitated and indeed, appears to reflect the change in potency of cells in development (Gulati et al., 2020). Maternal mRNAs can persist in this embryo sometimes until mesenchyme blastula stage and our data supports the model that developmental progression yields specialization, and decreased mRNA diversity. Overall the number of genes detected per cell by this approach is also consistent with other reports using a variety of cell types (Macosko et al., 2015; Siebert et al., 2019). At each stage of sea urchin embryogenesis (*S. purpuratus*), on average ~11,500 genes are actively transcribed, producing about 39 million transcripts per embryo (Tu et al., 2014). Depending on the stage, each of the many different cell states of the embryo would necessarily express less than this overall maximum so that the yield of mRNA information from each cell state could range as high as 60%. Thus, this scRNA-seq approach does not yield a complete mRNA profile, but one sufficient for distinguishing diverse cells states not otherwise achievable.

### Identification of 22 major cell populations through development to late gastrulae

Cluster visualization by tSNE plots show 22 major cell states in late gastrulae. As a test of the stringency of cell state identification we first identified marker gene expression in the three germ layers: ectoderm, endoderm, and mesoderm. The reader is then directed to further analysis in the supplement and to the datasets deposited in GEO [GSE149221].

**Ectoderm representatives:** We first assessed expression of a broad ectodermal marker SoxB2. SoxB2 expression was present throughout the sea urchin ectoderm and is known to play a role in neurogenesis (Anishchenko et al., 2018; Garner et al., 2016). Expression of SoxB2 is prominent in our dataset across several clusters at early time points, first in one cluster (10) at the 8-cell stage, later expanding to three more clusters (7,8,9). Beginning at hatched blastula stage, we noted a decrease in the number of cells in clusters 7-10 expressing SoxB2 (Fig. S4). The sea urchin nervous system consists of neurons arising from the animal pole domain (APD) and the ciliary band, both specialized regions of the ectoderm. Expression of the transcription factor Foxq2 marks the animal cap and the animal pole domain in the sea urchin embryo (Tu et al., 2006; Wei et al., 2009; Yaguchi et al., 2008). Foxq2 expression was detected quite early in our dataset. Significant and enriched expression of Foxq2 was localized to one cluster (9) at morula stage and this pattern was maintained until late gastrula, with a secondary cluster (17) arising at hatched blastula (Fig. S5). NK2.1 expression is known to be restricted to the apical ectoderm at blastula stage (Takacs et al., 2004), and its expression was present in the same two clusters where Foxq2 is enriched. Expression of the Foxq2 target gene, AnkAT-1, overlapped Foxq2 and NK2.1 (Fig. 2). AnkAT-1 was expressed in the animal plate at blastula stage (Yaguchi et al., 2010). We defined clusters 9 and 17 as neural cell states based on co-expression of Foxq2, NK2.1, and AnkAT-1 at late gastrula.

**Endoderm representatives:** The endoderm is subject to a number of regulatory steps, which result in specialized regions of the gut. FoxA, whose function is required for invagination of the gut and endoderm specification, is expressed vegetally at the blastula stage and becomes localized to the gut at gastrula stage (Oliveri et al., 2006). Endo16, an endoderm enriched gene, is first detected via in situ hybridization in the vegetal pole of mesenchyme blastula embryos. At gastrula stage, its expression is explicitly in the gut (Ransick et al., 1993) and serves as an excellent cell-type marker for endodermal cells of the mid-and hindgut. FoxA expression is concentrated in one cluster (8) at early blastula stage and its expression in this cluster remains high through later stages. Beginning at hatched blastula, three clusters maintained high FoxA expression (6,8,14) with overlapping Endo16 expression starting at early blastula stage (Fig. S6, Fig. S7). In gastrula stages, FoxA expression was more dynamic, present in cell states that do not express Endo16 (Fig. 3). FoxA expression is known to extend to the foregut while Endo16 does not (Annunziata et al., 2014). Moreover, even though Endo16 was mostly expressed throughout the mid-and hindguts of the endoderm, these regions are actually composed of different cell states distinguishable by transcript fingerprints. Endo16 positive cells at late gastrula (clusters 6,8,11,14) subcluster into 7 cell populations. After subclustering, we can distinguish the hind and midgut, the foregut, the secondary mesenchyme cells, the pigment cells, the skeleton cells, and neuronal cells (Fig. S8).

**Mesoderm representatives:** The primary mesenchyme cells (PMC) are a mesodermally-derived cell type which gives rise to the larval skeleton. The PMC lineage starts with an asymmetric division of the four micromeres in which the smaller cells that result become the small micromeres, the presumed primordial germ cells, and the larger cells become the PMCs. They will divide a limited and consistent number of times, ingress into the blastocoel, migrate to specific cluster sites, initiate mineralization, and then fuse and expand with the growing skeleton. The PMC were identified by expression of Alx1 and the spicule matrix protein genes, SM50 and SM37. Alx1 is a homeobox-containing gene known to be expressed in the large micromeres, and which is essential for activation of the many genes responsible for the spicule matrix of the larval skeleton (Ettensohn et al., 2003). SM37 and SM50 are transcriptional targets of Alx1 and are selectively expressed in the PMCs (George et al., 1991; Urry et al., 2000). Low level expression of Alx1 was first detected by scRNA-seq at the 64-cell stage in cluster 21. At morula stage, Alx1 expression is enriched in cluster 16 at high level. Expression of Alx1 in this cluster persisted until late gastrula. A second cluster (19) also showed persistent Alx1 expression from hatched blastula to late gastrula. Enrichment of SM50 and SM37 in the same cell clusters as Alx1 at blastula and later stages suggests these clusters represent the PMC cells (16,19) (Fig. 4, Fig. S9, Fig. S10, Fig. S11). At late gastrula, the percentage of cells expressing the PMC markers was greatly reduced. For example, at mesenchyme blastula, clusters 16 and 19 represent respectively 2.6 and 1.9% of total cells whereas at late gastrula stage, these numbers decreased to 0.11 and 0.66% respectively. We interpret this result as the reduced cell cycle in the PMCs with development relative to other somatic cells so that the percent of cells seen by scRNA-seq is decreased. Correlatively, we observed a decreasing level of cyclin B mRNA in both of these clusters over time (Fig. S27).

### Identification of distinct cell populations expressing the germ cell marker Nanos2

The primordial germ cells (PGCs) of the sea urchin are thought to be derived from the small micromeres resulting from the asymmetric cell division of the micromeres at the 16-32 cell stage transition. Nanos2 is first expressed in the germline and can be detected by RNA in situ hybridization at the 64-cell stage. Later in development, when the embryos start to gastrulate, Nanos2 mRNA can also be detected in somatic cells derived from the Veg2 lineage. Despite the rarity of these 2 cell types in the embryos, this single cell analysis

approach detected distinct Nanos2 expressing cells (Fig. 5). Nanos2 expression was first detected at the 64-cell stage in 14 cells at a low level. At the morula stage, 184 Nanos2 expressing cells were captured (0.49% of the population). The number of Nanos2 cells detected varied depending on the developmental stage. For example, at late gastrula that number dropped to 32 (0.25% of population). This drop in Nanos2 positive cells detected is expected since, while the embryo grows and develops with rapid cell cycling, the quiescent Nanos2 expressing cells (including the germ cells) do not cycle significantly and instead become a rare cell type of the embryo.

Nanos2 is first detected in cluster 20 at 64-cell stage and its expression is maintained in this cluster up to early gastrula stage. This expression of Nanos2 corresponds to the small micromere/PGC lineage, therefore we identified cluster 20 as the germline. Surprisingly, at the morula stage, Nanos2 is transiently detected in an additional cluster (16). These Nanos2 positive cells in both cluster 16 and 20 co-express two additional germline markers, *vasa* and *seawi* (Fig. 6B). Nanos2 expression is known to be very restricted in the embryo while *vasa* and *seawi* are more widespread, and that pattern is reflected in the plot (Fig. 6A). Later in development, cells of cluster 16 start expressing genes such as *Alx1* and *SM50* involved in skeleton formation. At the 16-cell stage, the micromeres divide asymmetrically to give rise to the large micromeres (PMCs) and the small micromeres (PGCs). This transient Nanos2 expression in cluster 16 (PMCs) suggests that the micromeres themselves might be expressing Nanos2 before giving rise to the germline. Nanos2 is then promptly lost in the PMCs and retained only in the germline. This analysis is the first evidence of two distinct cell states expressing the germline marker Nanos2 early in development and we are currently investigating this function. We first observed differentially expressed transcripts between clusters 16 and 20 at the morula stage to identify what makes them unique. While both clusters are quite similar in terms of gene expression, we see high levels of *SoxC* expression in cluster 16 compared to cluster 20 (Fig. 6C). *SoxC* is a transcription factor expressed in the ectodermal neural progenitors of the animal pole domain at blastula stage (Garner et al., 2016; Poustka et al., 2007) as well as in the *Veg2* lineage (Peter and Davidson, 2010).

In gastrulae, two additional Nanos2 cell states appear (Clusters 6 and 14). This secondary Nanos2 expression corresponds to the time in development in which the somatic *Veg2* cells start to express Nanos2. Nanos2 expression is regulated by *FoxY* in the somatic cells and *FoxY* mRNA is expressed in both the germ cells and these *Veg2* cells (Andrikou et al., 2013; Materna et al., 2013; Oulhen et al., 2019b; Song and Wessel, 2012). To further test the identity of these Nanos2 positive cells during early gastrulation, we examined *FoxY* expression. As predicted, *FoxY* was found enriched in clusters 6, 14, and 20 (Fig. S12) suggesting that the Nanos2 expressing cells in cluster 6 and 14 represent the *Veg2* lineage. Only a few transcripts are differentially expressed between cluster 6 and cluster 14, suggesting that they are either two closely related cell populations, or that it is one cell population in which some *Veg2* cells are just starting to express new markers and/or at different stages in their cell cycle. We then searched for the genes differentially expressed between these *Veg2* clusters together (6 and 14) versus the germline cluster (20) (Table S3, S4, S5). Genes such as *Endo16* and *Blimp1/krox* were found enriched in the *Veg2* lineage. In contrast, histone-related genes, such as *H2A.2.1*, were the most highly enriched genes found in the germline (Fig. S13). This may reflect a particular chromatin difference between the germ line and the somatic cells. *H2A.2.1* is already highly expressed in the earlier stages of development and becomes specifically retained in the PGCs (20), suggesting the maternal origin of this transcript. *Vasa* and *Seawi* are also more enriched in the germline compared to the *Veg2* lineage (Fig. S14, Fig. S15). Thus, the *Veg2*-Nanos2 population of cells has characteristics of germ line definition but is distinct from the PGC lineage derived from the small micromeres.

Overall, we learned that Nanos2 is expressed not only in the PGCs but also in distinct somatic cell populations in both morulae and gastrulae. We identified genes that are

differentially expressed between these Nanos2 positive cell states, making them distinct. These analyses revealed genes that are always co-expressed with Nanos2 throughout development, independently of the time point and the identity of the cell states (Table S6). Among the gene sets, we found uncharacterized transcripts such as LOC590448 (Homeodomain-containing transcription factor), LOC100888091 (sec independent translocase domain), and LOC582810 (Tudor domain) (Fig. S16). Interestingly, genes such as Krl (Krüppel like), Odz, Staufen and Maelstrom were also found in this analysis (Fig. S17-20). Krüppel-like factors are a family of zinc-finger transcription factors, essential for maintaining pluripotency (Bialkowska et al., 2017). Odz is a pair rule gene required for somatic gonad formation in *C.elegans* (Drabikowski et al., 2005). Staufen is an RNA binding protein required for the localization and translational repression of mRNAs in the *Drosophila* oocyte for example (Roegiers and Jan, 2000; St Johnston et al., 1991). In mice, staufen is expressed in the germ cells in both males and females (Saunders et al., 2000). Maelstrom has been suggested to play multiple roles in *Drosophila* oogenesis (Clegg et al., 2001; Findley et al., 2003) and mouse spermatogenesis (Soper et al., 2008). These germ line gene sets may help identify functional kernels in gene regulatory networks for a variety of germ line cells, and in cells that may more readily transition into a germ line lineage e.g. during regeneration, iPSC proclivities.

### **Genes expressed in the PGCs throughout development**

Early in development, the somatic cells divide rapidly but the primordial germ cells reduce their overall activities: transcription, RNA degradation, translation, mitochondria, cell cycle. The PGCs restart these activities after gastrulation, demonstrating a rapid, predictable, and transient quiescent activity. We previously identified some of the molecular mechanisms involved in regulating PGC quiescence: Cyclin B (cell cycle), eEF1A (translation), ADP/ATP translocase 1 (mitochondria), CNOT6 (RNA degradation) (Oulhen et al., 2017; Swartz et al., 2014). Quiescence is a common phenotype of stem cells and this single cell RNA seq data set is essential to better understand the molecular mechanisms required to induce, maintain, and exit cell quiescence. We first obtained the genes specifically enriched in the germ cells (cluster 20) for each developmental time point (Table S7). Interestingly, most of the transcripts found enriched in the PGCs are not unique to the germline. These mRNAs are also found in many other clusters, but their expression is enriched in the germline. As expected, Cyclin B and CNOT6 abundance decreased in the germline from the 64 cell stage to mesenchyme blastula. Markers of cell differentiation, such as Alx1 or Blimp1/krox, also show reduced expression in this cluster when the embryos reach mesenchyme blastula. Cyclin A and Geminin are highly enriched in the early stage PGCs compared to those in mesenchyme blastulae. In *Drosophila*, the degradation of Cyclin A is essential for the maintenance of the germline stem cells (Chen et al., 2009). Geminin has been associated with proliferation-differentiation decisions through balanced interactions with multiple binding partners (Patmanidi et al., 2017; Wohlschlegel et al., 2002). In contrast, the transcripts coding for ribosomal proteins become highly enriched in the germline in mesenchyme blastula, compared to the 64 cell stage. The transcript maelstrom mentioned above is also in this category of genes enriched in PGCs at the mesenchyme blastula stage. The ability to interrogate even rare cells in this dataset opens analysis to beyond the candidate genes and provides new avenues for testing germ cell gene functionality through diverse germ-line properties.

## Discussion:

We find distinct molecular profiles for at least 22 cell states and two distinct lineages for the germ line in gastrulae of the sea urchin, *S. purpuratus*. Although these cell states are not identified by in vivo lineage analysis, each have consistent features of marker genes to provide location for each cell state. These results enable more in-depth analysis for GRN interrogation using this discovery-based experimentation. Of surprise in the results is the fact that many genes thought to be specific to a cell type by in situ hybridization do instead have enrichment in one or another cell state, but then lesser and more broad distribution throughout many other cell states. *Alx1*, for example, is seen in many cell clusters, albeit at much lower levels than present in the PMCs. Are those broadly expressed transcripts functional in the alternative cell states? We cannot predict this outcome simply based on these wild-type embryos, but the results are sufficiently broad, consistent, and statistically significant that future experimentation of these gene products should be sensitive to more widespread phenotypes to test the result. We have explored whether this result could be artifactual. The broad distribution is most apparent in the violin plots in which each cell with a gene marker may be visualized, versus the feature plots, a more common figure format in the literature of single cell mRNA-seq in which the eye is directed to clusters of the greatest abundance [[satijalab.org/seurat/v3.0/](https://satijalab.org/seurat/v3.0/)]. Further, we find clusters lacking the breadth of expression, suggesting that the mRNA was not a broad contaminant of the experiment. In previous results (Figure 3 within (Zazueta-Novoa and Wessel, 2014) (Fig. S21)), the selectivity of a mRNA for a cell type is dependent on the length of substrate development. Short periods of signal development can show enrichment or even specificity in a cell type, but additional signal exposure shows much more uniform accumulation. Since the scRNA-seq is analyzed with definitive sequence information, we have confidence in these identification calls. We provide a paradigm wherein the conclusion is based on the technique used. *Gustavus* (*Gus*) mRNA is reported to accumulate specifically in cells of the vegetal pole in blastulae, surrounding the primordial germ cells. This is functionally relevant since *Gus* is an E3 ubiquitin ligase responsible for *Vasa* protein degradation, and during this selective expression *Vasa* protein becomes progressively restricted to the PGCs from a broad somatic presence (Gustafson et al., 2011). Whereas by single cell RNA-seq here, we find *Gus* transcripts enriched in cells of the vegetal pole, but broadly detectable in all cells of the embryo (Fig. S21). If, however, the in situ hybridization signal reaction was extended, *Gus* mRNA was then seen present broadly throughout the embryo ((Zazueta-Novoa and Wessel, 2014) and Fig. S21) consistent with the scRNA-seq data. This phenomenon does not change the interpretation of what these genes are doing, only that the specificity may be less than previously appreciated. This resonates with the results of the Human and Mouse ENCODE projects (<https://www.encodeproject.org/>) in which vastly more transcripts from throughout the genome were detected than otherwise anticipated. Perhaps the transcripts of cell “specific” genes present outside of the cell of interest are not actually functional, or short lived, or not translated by a variety of regulatory mechanisms. The consistency though of this phenomenon from widely disparate cells and organisms ((Briggs et al., 2018; Siebert et al., 2019); sea urchin here) suggests that the finding is of biological relevance.

The phenomenon of broad but low expression of “cell-type specific” markers has been reported in other organisms as well (Briggs et al., 2018; Macosko et al., 2015; Siebert et al., 2019) although the feature plots shown make such a result less apparent than the violin plots shown herein. We note that some transcripts are present at low level in all cell clusters, except for the PGC cluster. It is not yet clear whether these transcripts are repressed from transcription or are short lived in the germ line. It is noteworthy though that maternal transcripts, even ectopic transcripts, are usually retained in the germ line more effectively than in the soma (Gustafson and Wessel, 2010; Oulhen and Wessel, 2013; Swartz et al., 2014). Thus, these low-level transcripts broadly expressed outside of their “enriched” cell cluster appear to violate that selectivity in both ways – they are selectively *not* retained in the



germ line (if in fact they are transcribed in that cell type), and they are selectively *retained* outside of the germ line. Since the 3'UTR of some mRNAs in the sea urchin are known to be regulatory in such retention and turnover functions, we will compare the UTRs of these transcripts in the future to determine if conserved sequence signatures are present. Nanos2 is an RNA binding protein; it functions through its interaction with Pumilio, which binds RNAs containing a conserved motif in their 3' UTR, the Pumilio Response Element (PRE). These target mRNAs are then translationally repressed and/or degraded. Interestingly, some PMC markers such as SM37 and Alx1 have one or more predicted PRE in their 3'UTRs.

We previously reported mRNAs enriched in the small micromeres based on RNA-seq analysis of FACS sorted cells (Swartz et al., 2014). Several of the genes reported to be enriched in the small micromeres by FACS-isolation are present in our list of differentially expressed genes between Nanos2 positive and Nanos2 negative cells at the matching time point of early blastula and across the entire dataset. This includes Sp-z62 (LOC580113), and Sp-Ctdspl2 (LOC583286). Single cell sequencing revealed the expression of these common genes is not specific to the germline though, as is Nanos2 expression, but rather the genes are present in many cell clusters with slightly higher expression in the germline. These differences may be explained by significant differences in the two experimental approaches, one being bulk RNAseq of the germ line cells (calcein-positive cells) against all the other cells of the embryo (calcein-negative cells) while the current analysis is focused on single cell sequencing analyzed and compared individually to other cell states. A sharp gradient of mRNA accumulation highest in the vegetal pole would appear “specific” to the vegetal pole cells by bulk sequencing of the mRNA comparing isolated vegetal pole cells to the rest of the embryo, whereas single cell mRNA-seq would show this same transcript broadly expressed in clusters throughout the vegetal hemisphere of the embryo.

Nanos is a RNA-binding protein and was first described as a translational repressor in *Drosophila* (Cho et al., 2006; Irish et al., 1989). Nanos orthologs have since been found in the germ line of all animals tested (e.g. *C. elegans* (Kraemer et al., 1999), *Xenopus* (Lai et al., 2011) planarians (Wang et al., 2007)). We recently discovered that Nanos2 in the sea urchin is not only expressed in the germline but is present also in the somatic Veg2 mesoderm lineage during gastrulation. This is significant because when the precursor cells of the PGCs are removed from the embryo, the resultant adult still makes eggs and sperm. A replacement, or a second germ line lineage, must be present prior to adulthood. It was learned that loss of the micromeres, the PGC precursor cell, results in dramatic upregulation of Vasa protein throughout the embryo. Later, Vasa becomes restricted to sub-populations of cells, including Veg2 descendants (Voronina et al., 2008). Thus, it was thought that a secondary site of germ line potential is present and may be within the Veg2 tier. This Veg2 mesoderm is derived from the Veg2 endomesoderm lineage, the distinction between endoderm and mesoderm specification in Veg2 depends on the Delta/Notch signaling system at the blastula stage. The Veg2 mesoderm will give rise to multiple cell types such as the pigment cells, the blastocoelar cells, the esophageal muscle cells, and cells of the coelomic pouches (Cameron et al., 1991; Davidson et al., 1998; Peter and Davidson, 2010). The early expression of Nanos2 in the PGCs requires the maternal Wnt pathway for expression whereas the somatic Nanos2 expression instead requires Delta/Notch signaling through the forkhead family member FoxY (Oulhen et al., 2019b). The expression of germ-line determinant genes is highly regulated in many animals. Indeed, ectopic expression of these genes can induce cell cycle and developmental defects (Luo et al., 2011; Wu and Ruvkun, 2010) and Nanos is thought to be “toxic” outside of its normal domain (Lai and King, 2013). With the results presented here, we now conclude that a population of Veg2 cells contains a unique repertoire of cell-type factors, including those normally responsible for a germ line fate. This cell lineage also has other, partial germ line characteristics that supports this conclusion. This includes partial quiescence of protein synthesis and other metabolic features (Oulhen et al., 2017; Oulhen et al., 2019b) that reflects a lower level of Nanos2 translational repression. Future experimentation will attempt to analyze scRNA data in this

embryo following micromere depletion to determine how the Veg2 lineage may change in such instances in loss of PGC-precursors. Since some other animal embryos also appear to somehow compensate for a lost germ line, this molecular mechanism may serve as a paradigm for germ line conversion, or regeneration mechanisms (Wessel et al., 2020).

Overall, we find the scmRNA-seq approach used herein to be highly productive in identifying changes in cell states and gene expression throughout early development of the sea urchin. By use of an estimated 300 embryos after gastrulation, one can acquire sufficient numbers of cells to analyze with this technique, opening a protocol for MASO or CRISPR/Cas9 manipulation of the embryo and subsequent testing of impact on the 22 cell clusters revealed herein. The breadth of developmental perturbations is further magnified by common pharmacological approaches, which have already revealed remarkable selectivity (Foster et al. 2019), further increasing the confidence level of valid interpretations from such experimental approaches. Coupled with the reproducibility shown here, this animal and this technology are a wonderful marriage for deep biomedical research.

### Material and methods:

**Embryo cultures and dissociations:** Eggs and sperm of *S.purpuratus* were spawned by injection of 0.5M KCl into the adult coelomic cavity. Fertilization was accomplished in sea water containing 10mM p-aminobenzoic acid to reduce cross-linking of the fertilization envelope, and which was washed out after 30 minutes. Embryos were cultured in filtered (0.2micron) sea water collected at the Marine Biological laboratories in Woods Hole MA, until the appropriate stage for dissociation. All embryos used in the study resulted from mating of one male and one female. Multiple fertilizations were initiated in this study and timed such that the appropriate stages of embryonic development were reached at a common endpoint. The embryos were then collected and washed twice with calcium-free sea water, and then suspended hyalin-extraction media (HEM) for 10-15 minutes, depending on the stage of dissociation. When cells were beginning to dissociate, the embryos were collected and washed in 0.5M NaCl, gently sheared with a pipette, run through a 40micron Nitex mesh, counted on a hemocytometer, and diluted to reach the appropriate concentration for the scmRNA-seq protocol. Equal numbers of embryos were used in each time point and at no time were cells or embryos pelleted in a centrifuge (Oulhen et al., 2019a).

**Single cell RNA sequencing:** Single cell encapsulation was performed using the Chromium Single Cell Chip B kit on the 10x Genomics Chromium Controller. Single cell cDNA and libraries were prepared using the Chromium Single Cell 3' Reagent kit v3 Chemistry. Libraries were sequenced by Genewiz on the Illumina Hiseq (2x150 bp paired-end runs). Single cell unique molecular identifier (UMI) counting (counting of unique barcodes given to individual transcript molecules), was performed using Cell Ranger Single Cell Software Suite 3.0.2 from 10X Genomics. The custom transcriptome reference was generated from assembly *Spur\_4.2* using CellRanger. Duplicate blastula and gastrula stage libraries were aggregated using the cellranger aggr function. Cellranger gene expression matrices were further analyzed using the R package Seurat v 3.1.4 (Butler et al., 2018; Stuart et al., 2019). Cells of 8-cell to early blastula stage with at least 1500 and at most 7000 genes (features), and cells with at least 400 and at most 2500 genes in hatched blastula to late gastrula stage were included in downstream analysis. Individual datasets were normalized by scaling gene expression in each cell by total gene expression and then log transformed. The top 2000 highly variable genes across the datasets were then used to integrate the datasets. Individual time point datasets were integrated (following the Seurat v3 pipeline) to identify conserved cell populations across the datasets. This technique involves pairwise comparison of individual cells across multiple datasets followed by hierarchical clustering. T-SNE (T-distributed Stochastic Neighbor Embedding is a machine learning

algorithm for visualizations) projection and clustering analysis for visualization of the integrated data was conducted using the parameter dimensions=15 and resolution=0.5. The use of 15 dimensions, in other words, the inclusion of 15 principle components, was made with consideration of principal component heatmaps which show heterogeneity sources in a dataset and the ElbowPlot function which depicts the number of principle components that include the variance present in the data. The dataset was also visualized at a resolution of 3 to provide example of how additional cell states may be revealed, including subtypes of the states seen and identified at resolution 0.5. No one resolution setting is optimal for all clusters but these disparate settings are intended to assist the reader in data interpretation and identification of candidate genes. The resolution parameter of the FindClusters function can be modulated to show greater or fewer clusters and a series of different resolutions can be tested before choosing a value that is appropriate with the biological context of an experiment. Subclustering of the endoderm representatives was performed using the Subset function to capture clusters of interest, followed by finding variable features and rescaling. The clustering parameters used were dimensions:10, resolution: 1.0. Cluster markers were found using FindConservedMarkers and FindMarkers functions. The comparison of the Foster et al., 2019 dataset and the corresponding timepoint from this dataset was performed following the same pipeline described above and visualized with parameters dims=20, res=0.5. Average Expression is measured as count data normalized to library size and log transformed (Stuart et al., 2019).

**Data availability:** The sequencing files and gene expression matrices for the single-cell RNA-seq analysis presented here have been deposited in the GEO database and may be accessed with the accession number GSE149221.

#### **Acknowledgements:**

Part of this research was conducted using resources and services at the Computational Biology Core and Center for Computation and Visualization, Brown University. A special thanks to August Guang and Ashok Ragavendran of the Computational Biology Core. We thank Shane Evans for helpful conversations regarding analysis of the data. We are grateful for support from the NIH (9RO1GM125071, 1R01GM132222, 1P20GM119943)

#### **References:**

- Andrikou, C., Iovene, E., Rizzo, F., Oliveri, P., Arnone, M.I., 2013. Myogenesis in the sea urchin embryo: the molecular fingerprint of the myoblast precursors. *Evodevo* 4, 33.
- Anishchenko, E., Arnone, M.I., D'Aniello, S., 2018. SoxB2 in sea urchin development: implications in neurogenesis, ciliogenesis and skeletal patterning. *Evodevo* 9, 5.
- Annunziata, R., Perillo, M., Andrikou, C., Cole, A.G., Martinez, P., Arnone, M.I., 2014. Pattern and process during sea urchin gut morphogenesis: the regulatory landscape. *Genesis* 52, 251-268.
- Bialkowska, A.B., Yang, V.W., Mallipattu, S.K., 2017. Kruppel-like factors in mammalian stem cells and development. *Development* 144, 737-754.
- Briggs, J.A., Weinreb, C., Wagner, D.E., Megason, S., Peshkin, L., Kirschner, M.W., Klein, A.M., 2018. The dynamics of gene expression in vertebrate embryogenesis at single-cell resolution. *Science* 360.
- Bruskin, A.M., Tyner, A.L., Wells, D.E., Showman, R.M., Klein, W.H., 1981. Accumulation in embryogenesis of five mRNAs enriched in the ectoderm of the sea urchin pluteus. *Dev Biol* 87, 308-318.
- Butler, A., Hoffman, P., Smibert, P., Papalexi, E., Satija, R., 2018. Integrating single-cell transcriptomic data across different conditions, technologies, and species. *Nat Biotechnol* 36, 411-420.

- Cameron, R.A., Fraser, S.E., Britten, R.J., Davidson, E.H., 1991. Macromere cell fates during sea urchin development. *Development* 113, 1085-1091.
- Chen, D., Wang, Q., Huang, H., Xia, L., Jiang, X., Kan, L., Sun, Q., Chen, D., 2009. Effete-mediated degradation of Cyclin A is essential for the maintenance of germline stem cells in *Drosophila*. *Development* 136, 4133-4142.
- Cho, P.F., Gamberi, C., Cho-Park, Y.A., Cho-Park, I.B., Lasko, P., Sonenberg, N., 2006. Cap-dependent translational inhibition establishes two opposing morphogen gradients in *Drosophila* embryos. *Curr Biol* 16, 2035-2041.
- Clegg, N.J., Findley, S.D., Mahowald, A.P., Ruohola-Baker, H., 2001. Maelstrom is required to position the MTOC in stage 2-6 *Drosophila* oocytes. *Dev Genes Evol* 211, 44-48.
- Davidson, E.H., Cameron, R.A., Ransick, A., 1998. Specification of cell fate in the sea urchin embryo: summary and some proposed mechanisms. *Development* 125, 3269-3290.
- Drabikowski, K., Trzebiatowska, A., Chiquet-Ehrismann, R., 2005. *ten-1*, an essential gene for germ cell development, epidermal morphogenesis, gonad migration, and neuronal pathfinding in *Caenorhabditis elegans*. *Dev Biol* 282, 27-38.
- Ettensohn, C.A., Illies, M.R., Oliveri, P., De Jong, D.L., 2003. *Alx1*, a member of the *Cart1/Alx3/Alx4* subfamily of Paired-class homeodomain proteins, is an essential component of the gene network controlling skeletogenic fate specification in the sea urchin embryo. *Development* 130, 2917-2928.
- Findley, S.D., Tamanaha, M., Clegg, N.J., Ruohola-Baker, H., 2003. *Maelstrom*, a *Drosophila* spindle-class gene, encodes a protein that colocalizes with *Vasa* and *RDE1/AGO1* homolog, *Aubergine*, in *nuage*. *Development* 130, 859-871.
- Fink, R.D., McClay, D.R., 1985. Three cell recognition changes accompany the ingression of sea urchin primary mesenchyme cells. *Dev Biol* 107, 66-74.
- Foster, S., Teo, Y.V., Neretti, N., Oulhen, N., Wessel, G.M., 2019. Single cell RNA-seq in the sea urchin embryo show marked cell-type specificity in the Delta/Notch pathway. *Mol Reprod Dev* 86, 931-934.
- Fujii, T., Sakamoto, N., Ochiai, H., Fujita, K., Okamitsu, Y., Sumiyoshi, N., Minokawa, T., Yamamoto, T., 2009. Role of the *nanos* homolog during sea urchin development. *Dev Dyn* 238, 2511-2521.
- Garner, S., Zysk, I., Byrne, G., Kramer, M., Moller, D., Taylor, V., Burke, R.D., 2016. Neurogenesis in sea urchin embryos and the diversity of deuterostome neurogenic mechanisms. *Development* 143, 286-297.
- George, N.C., Killian, C.E., Wilt, F.H., 1991. Characterization and expression of a gene encoding a 30.6-kDa *Strongylocentrotus purpuratus* spicule matrix protein. *Dev Biol* 147, 334-342.
- Gulati, G.S., Sikandar, S.S., Wesche, D.J., Manjunath, A., Bharadwaj, A., Berger, M.J., Ilagan, F., Kuo, A.H., Hsieh, R.W., Cai, S., Zabala, M., Scheeren, F.A., Lobo, N.A., Qian, D., Yu, F.B., Dirbas, F.M., Clarke, M.F., Newman, A.M., 2020. Single-cell transcriptional diversity is a hallmark of developmental potential. *Science* 367, 405-411.
- Gustafson, E.A., Wessel, G.M., 2010. Exogenous RNA is selectively retained in the small micromeres during sea urchin embryogenesis. *Mol Reprod Dev* 77, 836.
- Gustafson, E.A., Yajima, M., Juliano, C.E., Wessel, G.M., 2011. Post-translational regulation by *gustavus* contributes to selective *Vasa* protein accumulation in multipotent cells during embryogenesis. *Dev Biol* 349, 440-450.
- Irish, V., Lehmann, R., Akam, M., 1989. The *Drosophila* posterior-group gene *nanos* functions by repressing *hunchback* activity. *Nature* 338, 646-648.
- Juliano, C.E., Yajima, M., Wessel, G.M., 2010. *Nanos* functions to maintain the fate of the small micromere lineage in the sea urchin embryo. *Dev Biol* 337, 220-232.
- Klein, A.M., 2017. What is your conceptual definition of "Cell type" in the context of a mature organism? *Cell Syst*, 256.
- Klein, A.M., Mazutis, L., Akartuna, I., Tallapragada, N., Veres, A., Li, V., Peshkin, L., Weitz, D.A., Kirschner, M.W., 2015. Droplet barcoding for single-cell transcriptomics applied to embryonic stem cells. *Cell* 161, 1187-1201.

- Kraemer, B., Crittenden, S., Gallegos, M., Moulder, G., Barstead, R., Kimble, J., Wickens, M., 1999. NANOS-3 and FBF proteins physically interact to control the sperm-oocyte switch in *Caenorhabditis elegans*. *Curr Biol* 9, 1009-1018.
- Lai, F., King, M.L., 2013. Repressive translational control in germ cells. *Mol Reprod Dev* 80, 665-676.
- Lai, F., Zhou, Y., Luo, X., Fox, J., King, M.L., 2011. Nanos1 functions as a translational repressor in the *Xenopus* germline. *Mech Dev* 128, 153-163.
- Luo, X., Nerlick, S., An, W., King, M.L., 2011. *Xenopus* germline nanos1 is translationally repressed by a novel structure-based mechanism. *Development* 138, 589-598.
- Macosko, E.Z., Basu, A., Satija, R., Nemesh, J., Shekhar, K., Goldman, M., Tirosh, I., Bialas, A.R., Kamitaki, N., Martersteck, E.M., Trombetta, J.J., Weitz, D.A., Sanes, J.R., Shalek, A.K., Regev, A., McCarroll, S.A., 2015. Highly Parallel Genome-wide Expression Profiling of Individual Cells Using Nanoliter Droplets. *Cell* 161, 1202-1214.
- Materna, S.C., Swartz, S.Z., Smith, J., 2013. Notch and Nodal control forkhead factor expression in the specification of multipotent progenitors in sea urchin. *Development* 140, 1796-1806.
- McClay, D.R., Chambers, A.F., Warren, R.H., 1977. Specificity of cell-cell interactions in sea urchin embryos. Appearance of new cell-surface determinants at gastrulation. *Dev Biol* 56, 343-355.
- McClay, D.R., Marchase, R.B., 1979. Separation of ectoderm and endoderm from sea urchin pluteus larvae and demonstration of germ layer-specific antigens. *Dev Biol* 71, 289-296.
- Oliveri, P., Walton, K.D., Davidson, E.H., McClay, D.R., 2006. Repression of mesodermal fate by *foxa*, a key endoderm regulator of the sea urchin embryo. *Development* 133, 4173-4181.
- Oulhen, N., Foster, S., Wray, G., Wessel, G., 2019a. Identifying gene expression from single cells to single genes. *Methods Cell Biol* 151, 127-158.
- Oulhen, N., Swartz, S.Z., Laird, J., Mascaro, A., Wessel, G.M., 2017. Transient translational quiescence in primordial germ cells. *Development* 144, 1201-1210.
- Oulhen, N., Swartz, S.Z., Wang, L., Wikramanayake, A., Wessel, G.M., 2019b. Distinct transcriptional regulation of *Nanos2* in the germ line and soma by the Wnt and delta/notch pathways. *Dev Biol* 452, 34-42.
- Oulhen, N., Wessel, G.M., 2013. Retention of exogenous mRNAs selectively in the germ cells of the sea urchin requires only a 5'-cap and a 3'-UTR. *Mol Reprod Dev* 80, 561-569.
- Patmanidi, A.L., Champeris Tsaniras, S., Karamitros, D., Kyrousi, C., Lygerou, Z., Taraviras, S., 2017. Concise Review: Geminin-A Tale of Two Tails: DNA Replication and Transcriptional/Epigenetic Regulation in Stem Cells. *Stem Cells* 35, 299-310.
- Peter, I.S., Davidson, E.H., 2010. The endoderm gene regulatory network in sea urchin embryos up to mid-blastula stage. *Dev Biol* 340, 188-199.
- Poustka, A.J., Kuhn, A., Groth, D., Weise, V., Yaguchi, S., Burke, R.D., Herwig, R., Lehrach, H., Panopoulou, G., 2007. A global view of gene expression in lithium and zinc treated sea urchin embryos: new components of gene regulatory networks. *Genome Biol* 8, R85.
- Ransick, A., Ernst, S., Britten, R.J., Davidson, E.H., 1993. Whole mount in situ hybridization shows Endo 16 to be a marker for the vegetal plate territory in sea urchin embryos. *Mech Dev* 42, 117-124.
- Roegiers, F., Jan, Y.N., 2000. Staufen: a common component of mRNA transport in oocytes and neurons? *Trends Cell Biol* 10, 220-224.
- Saunders, P.T., Pathirana, S., Maguire, S.M., Doyle, M., Wood, T., Bownes, M., 2000. Mouse staufen genes are expressed in germ cells during oogenesis and spermatogenesis. *Mol Hum Reprod* 6, 983-991.

- Siebert, S., Farrell, J.A., Cazet, J.F., Abeykoon, Y., Primack, A.S., Schnitzler, C.E., Juliano, C.E., 2019. Stem cell differentiation trajectories in Hydra resolved at single-cell resolution. *Science* 365.
- Song, J.L., Wessel, G.M., 2012. The forkhead transcription factor FoxY regulates Nanos. *Mol Reprod Dev* 79, 680-688.
- Soper, S.F., van der Heijden, G.W., Hardiman, T.C., Goodheart, M., Martin, S.L., de Boer, P., Bortvin, A., 2008. Mouse maelstrom, a component of nuage, is essential for spermatogenesis and transposon repression in meiosis. *Dev Cell* 15, 285-297.
- St Johnston, D., Beuchle, D., Nusslein-Volhard, C., 1991. Staufen, a gene required to localize maternal RNAs in the Drosophila egg. *Cell* 66, 51-63.
- Stuart, T., Butler, A., Hoffman, P., Hafemeister, C., Papalexi, E., Mauck, W.M., 3rd, Hao, Y., Stoeckius, M., Smibert, P., Satija, R., 2019. Comprehensive Integration of Single-Cell Data. *Cell* 177, 1888-1902 e1821.
- Swartz, S.Z., Reich, A.M., Oulhen, N., Raz, T., Milos, P.M., Campanale, J.P., Hamdoun, A., Wessel, G.M., 2014. Deadenylase depletion protects inherited mRNAs in primordial germ cells. *Development* 141, 3134-3142.
- Takacs, C.M., Amore, G., Oliveri, P., Poustka, A.J., Wang, D., Burke, R.D., Peterson, K.J., 2004. Expression of an NK2 homeodomain gene in the apical ectoderm defines a new territory in the early sea urchin embryo. *Dev Biol* 269, 152-164.
- Tu, Q., Brown, C.T., Davidson, E.H., Oliveri, P., 2006. Sea urchin Forkhead gene family: phylogeny and embryonic expression. *Dev Biol* 300, 49-62.
- Tu, Q., Cameron, R.A., Davidson, E.H., 2014. Quantitative developmental transcriptomes of the sea urchin *Strongylocentrotus purpuratus*. *Dev Biol* 385, 160-167.
- Urry, L.A., Hamilton, P.C., Killian, C.E., Wilt, F.H., 2000. Expression of spicule matrix proteins in the sea urchin embryo during normal and experimentally altered spiculogenesis. *Dev Biol* 225, 201-213.
- Voronina, E., Lopez, M., Juliano, C.E., Gustafson, E., Song, J.L., Extavour, C., George, S., Oliveri, P., McClay, D., Wessel, G., 2008. Vasa protein expression is restricted to the small micromeres of the sea urchin, but is inducible in other lineages early in development. *Dev Biol* 314, 276-286.
- Wang, Y., Zayas, R.M., Guo, T., Newmark, P.A., 2007. nanos function is essential for development and regeneration of planarian germ cells. *Proc Natl Acad Sci U S A* 104, 5901-5906.
- Wei, Z., Yaguchi, J., Yaguchi, S., Angerer, R.C., Angerer, L.M., 2009. The sea urchin animal pole domain is a Six3-dependent neurogenic patterning center. *Development* 136, 1179-1189.
- Wessel, G.M., Morita, S., Oulhen, N., 2020. Somatic cell conversion to a germ cell lineage: A violation or a revelation? *J Exp Zool B Mol Dev Evol*.
- Wohlschlegel, J.A., Kutok, J.L., Weng, A.P., Dutta, A., 2002. Expression of geminin as a marker of cell proliferation in normal tissues and malignancies. *Am J Pathol* 161, 267-273.
- Wu, X., Ruvkun, G., 2010. Cancer. Germ cell genes and cancer. *Science* 330, 1761-1762.
- Yaguchi, S., Yaguchi, J., Angerer, R.C., Angerer, L.M., 2008. A Wnt-FoxQ2-nodal pathway links primary and secondary axis specification in sea urchin embryos. *Dev Cell* 14, 97-107.
- Yaguchi, S., Yaguchi, J., Wei, Z., Shiba, K., Angerer, L.M., Inaba, K., 2010. ankAT-1 is a novel gene mediating the apical tuft formation in the sea urchin embryo. *Dev Biol* 348, 67-75.
- Zazueta-Novoa, V., Wessel, G.M., 2014. Protein degradation machinery is present broadly during early development in the sea urchin. *Gene Expr Patterns* 15, 135-141.

## Figures

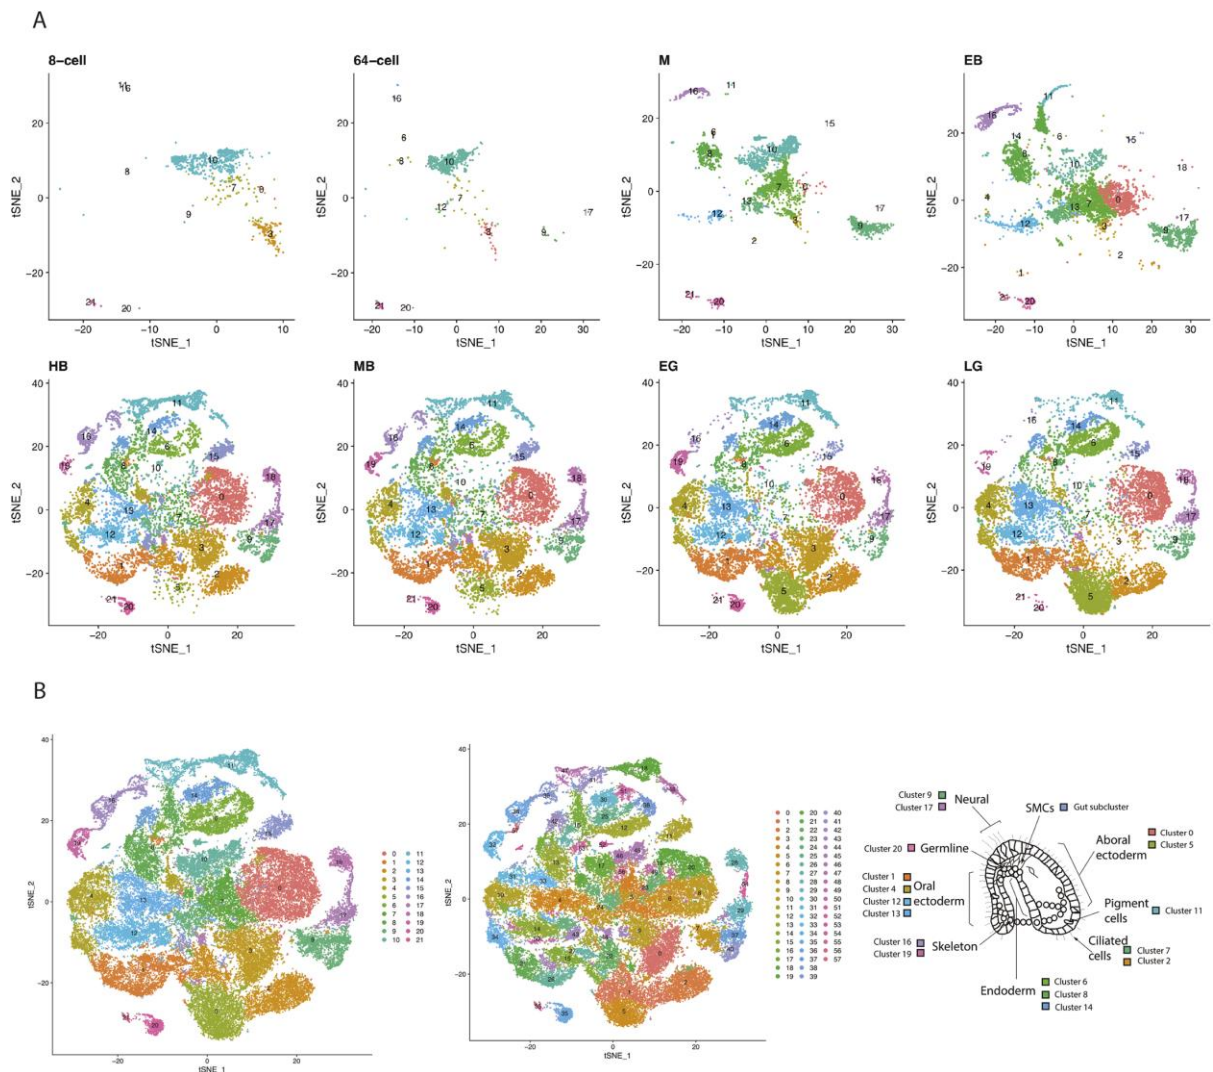

**Fig 1.** (A) tSNE plots of major developmental stages: 8-cell stage, 64-cell, morula, early blastula, hatched blastula, mesenchyme blastula, early gastrula, and late gastrula after alignment. 60,399 total single cells are colored by cluster identity. Twenty-two cell populations are detected across the eight time points. (B) Higher resolution enables visualization of more cell states present. t-SNE plot of integrated dataset with clustering performed at a resolution of 0.5 (left) shows 22 cell states and resolution 3 reveals 58 cell states (center). Cells are colored by cluster identity. (right) Drawing of late gastrula stage sea urchin mapping cell states identified by scRNA-seq to the embryo. Colors match cell states seen at resolution 0.5 (left).

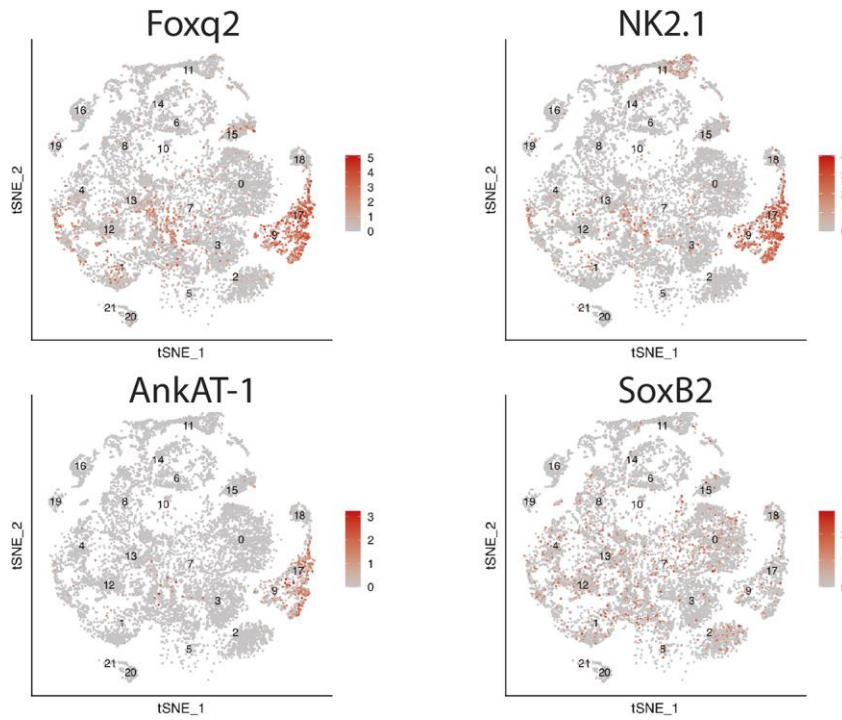

**Fig 2.** Feature plots showing coexpression of neural precursor genes at hatched blastula stage. Apical ectoderm markers, NK2.1, Foxq2, and AnkAT-1 expression enriched in clusters 9, 17. Neural precursor gene, SoxB2, known to be expressed throughout the ectoderm seen more broadly expressed. Cells are colored by relative expression level.



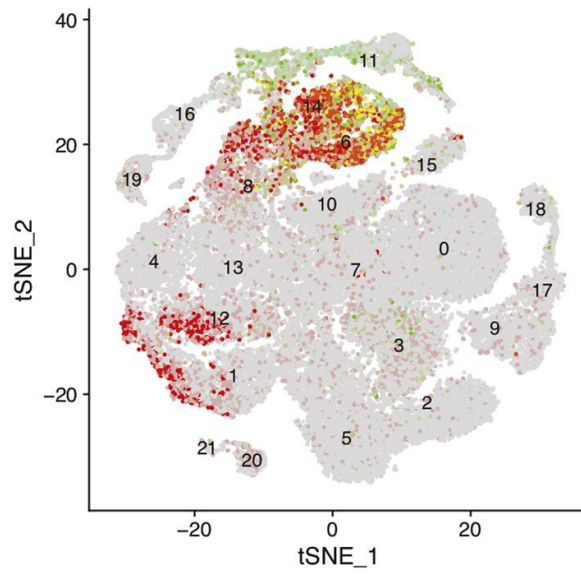

**Fig. 3.** Feature plot showing expression of FoxA (red) and Endo16 (green) across the dataset. Coexpression (yellow) of FoxA and Endo16 in clusters 6 and 14.

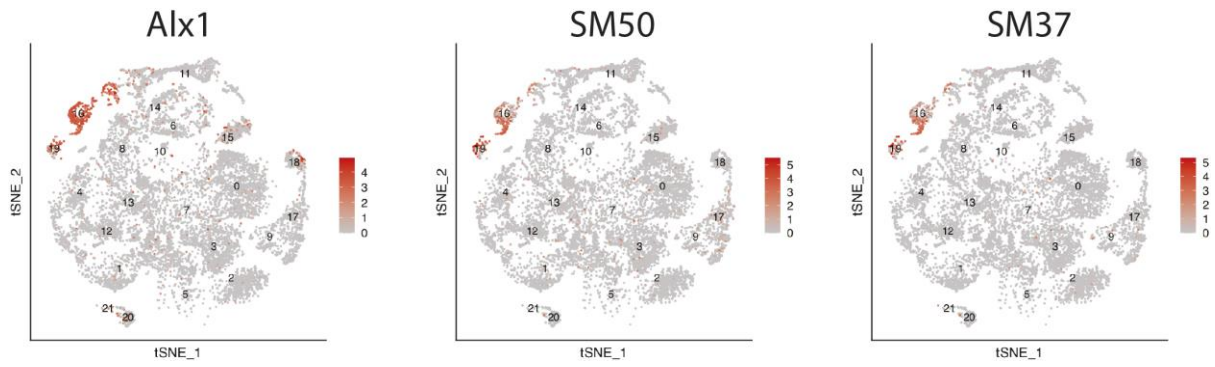

**Fig. 4.** Clusters 16 and 19 marked by expression of PMC marker genes, Alx1, SM50, SM37, at hatched blastula stage. Cells are colored by relative expression level.

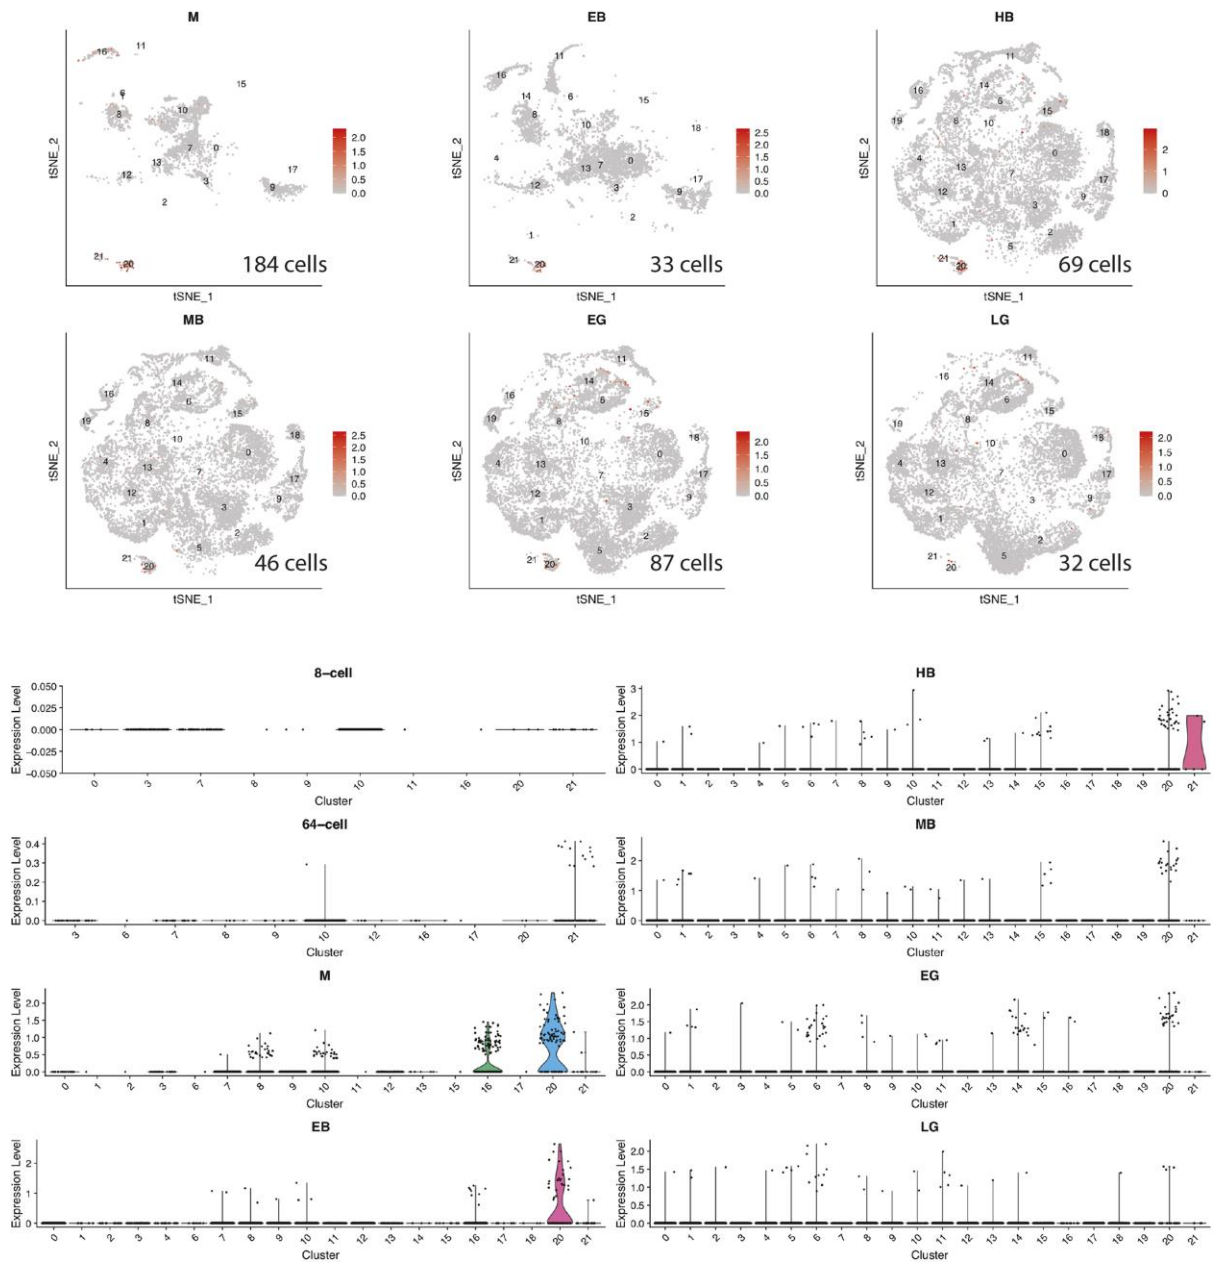

**Fig. 5.** Feature and violin plots of relative *Nanos2* expression per cluster (cell state) at different developmental time points. Number of *Nanos2* positive cells detected per time point included in feature plots. Cells are included based on normalized expression level with a lower threshold set to 1, except for 64-cell stage in which it was set to 0.2.

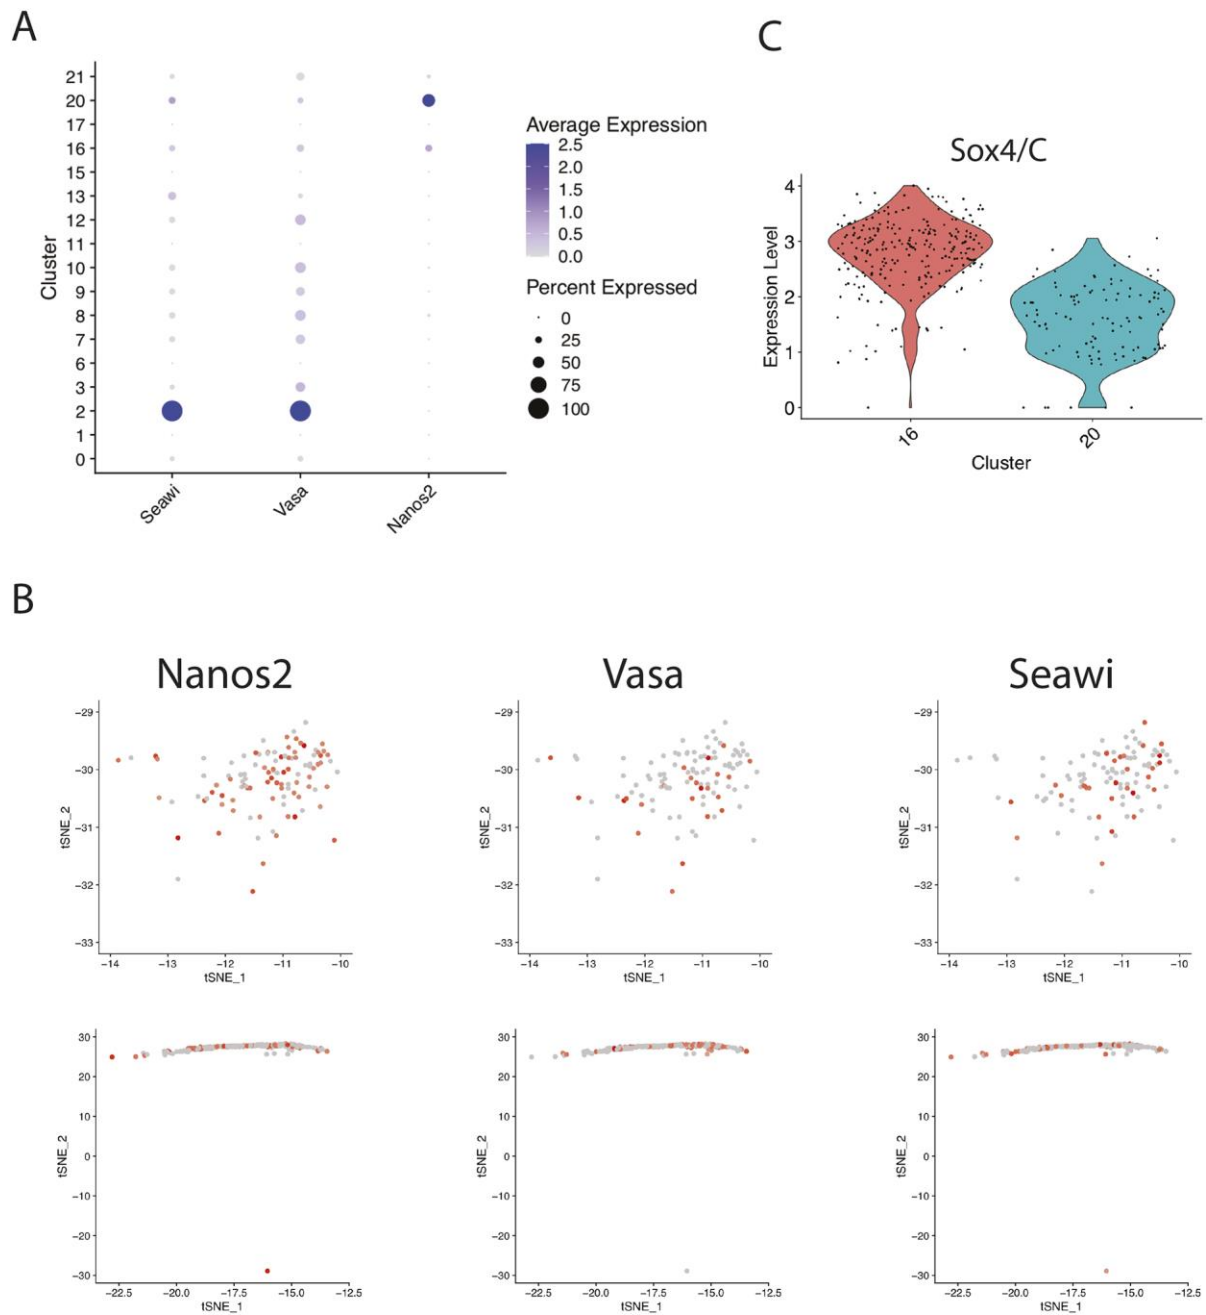

**Fig. 6.** Coexpression of germ line genes in clusters 16 and 20 at morula stage. (A) Dotplot showing expression of germ line markers *nanos2*, *vasa*, and *seawi*. Dot size relates percent of cells expressing gene of interest, dot color conveys expression level. (B) Expression of *nanos2*, *vasa*, and *seawi* in clusters 20 (above) and 16 (below) in morulae. (C) Violin plot showing enrichment of *Sox4/C* in cluster 16 at morula stage. Normalized gene expression values at log scale are shown.

## Fig. S1

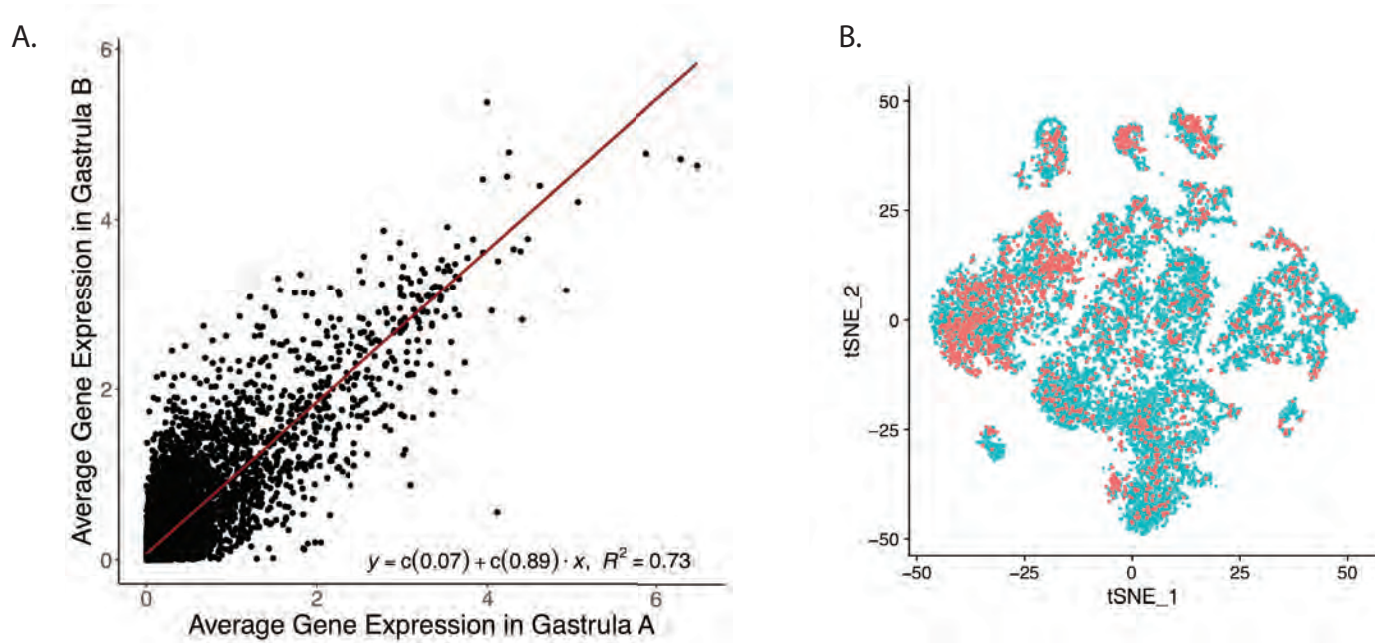

Fig. S1. (A) Comparison of average gene expression between Gastrula A, control from previous experiment (2,435 cells), and Gastrula B, corresponding time point from current analysis (12,763 cells). F-statistic: 5.837e+04 on 1 and 21088 degrees of freedom, p-value: < 2.2e-16. (B) t-SNE plot of early gastrula stage embryos after integration. In red is Gastrula A, in blue is Gastrula B. (dim:20 resolution:0.5)

Fig. S2:

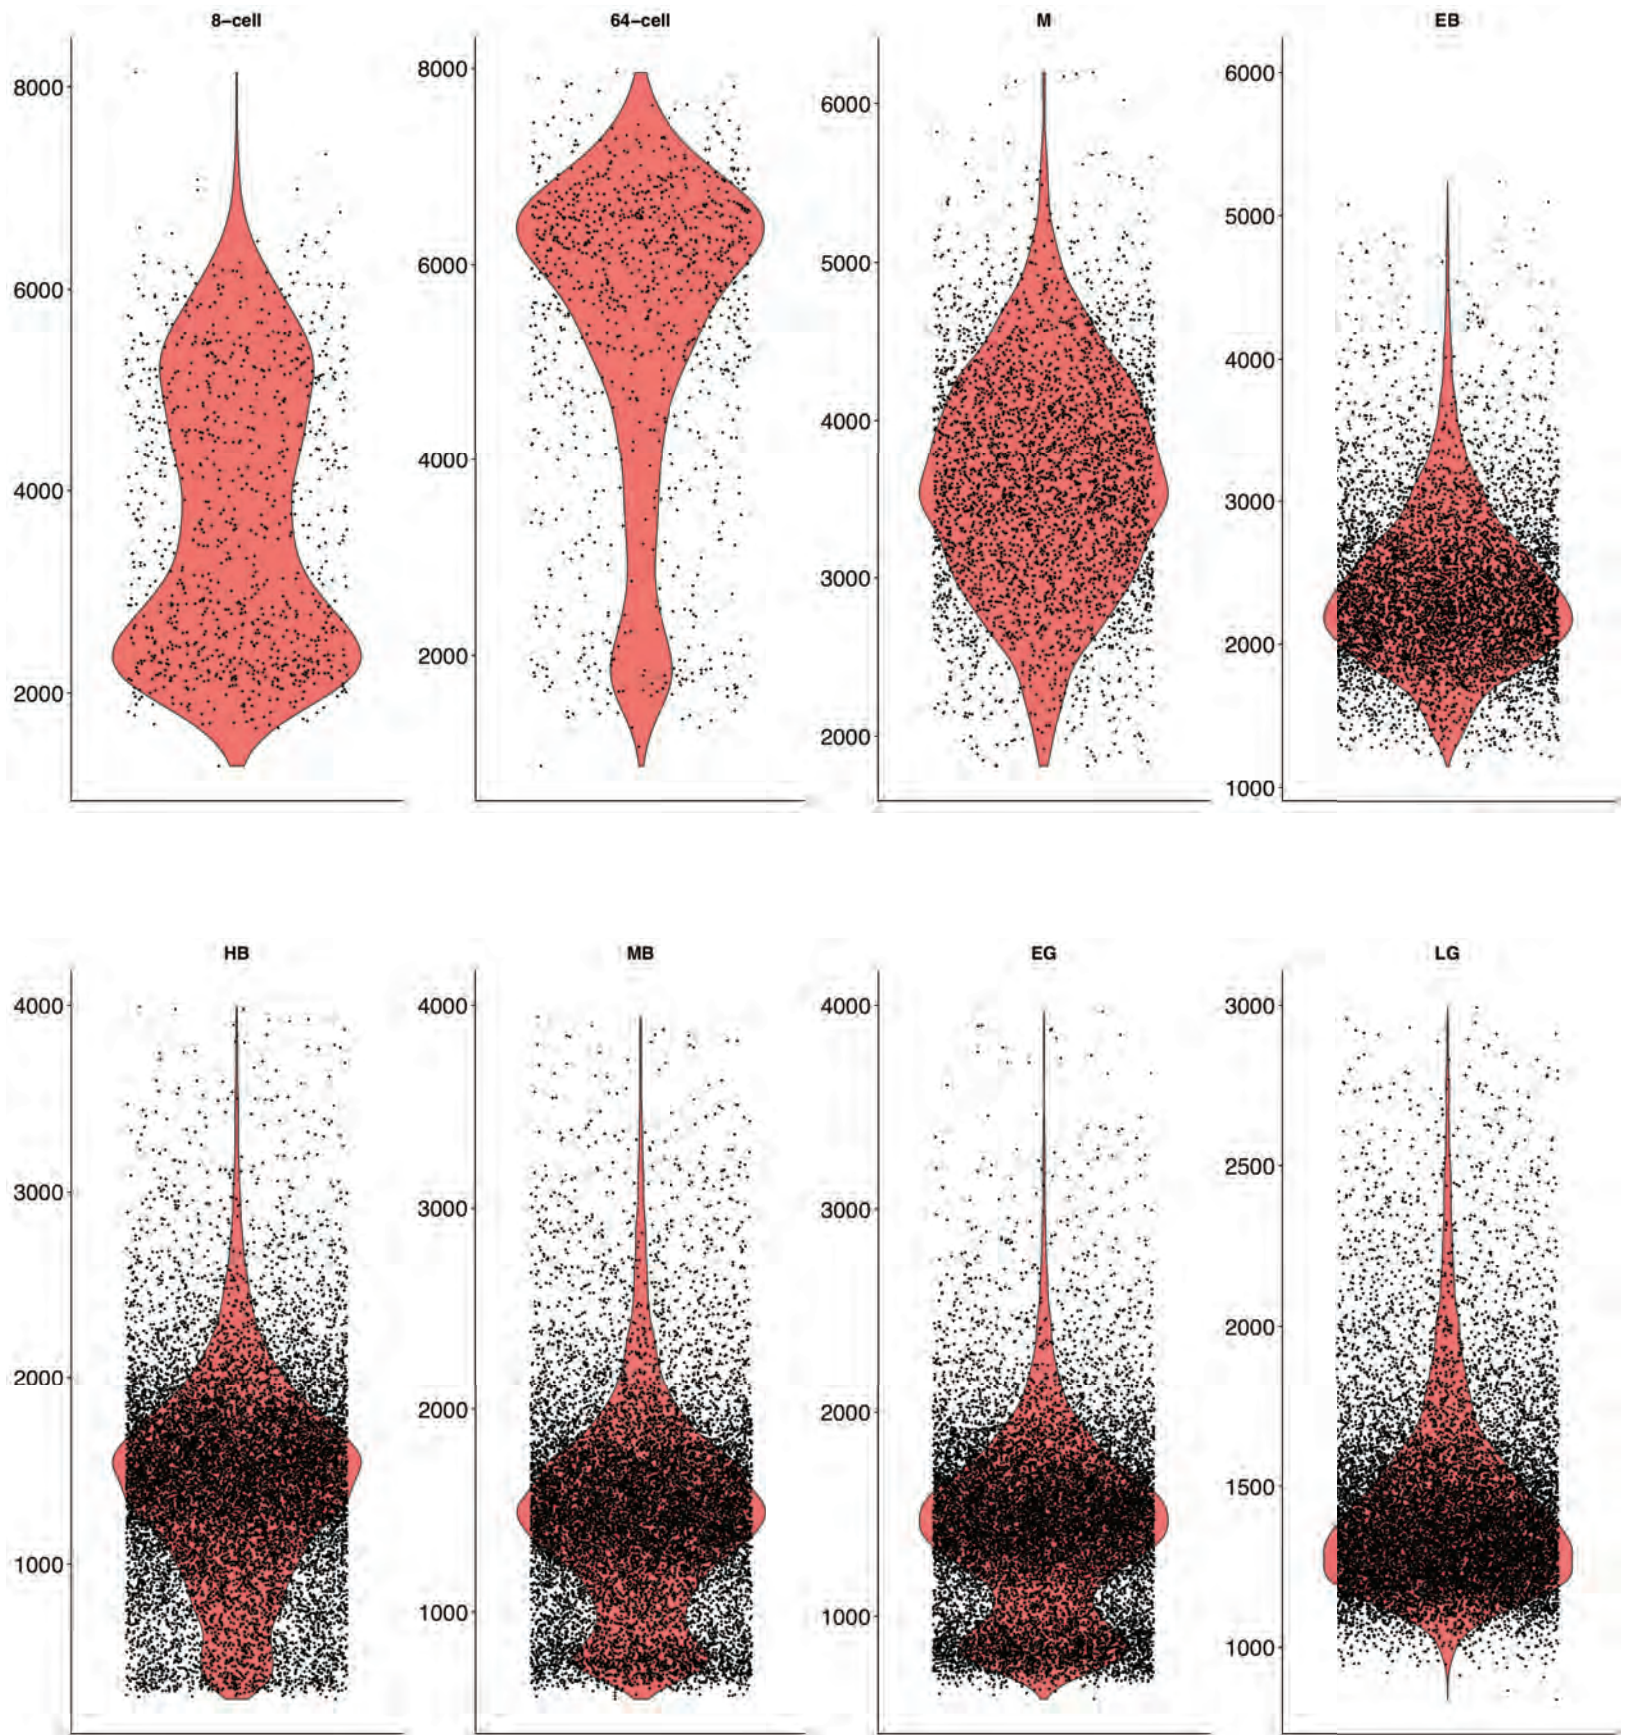

Fig. S2. Total genes detected per cell across developmental time points.

Fig. S3

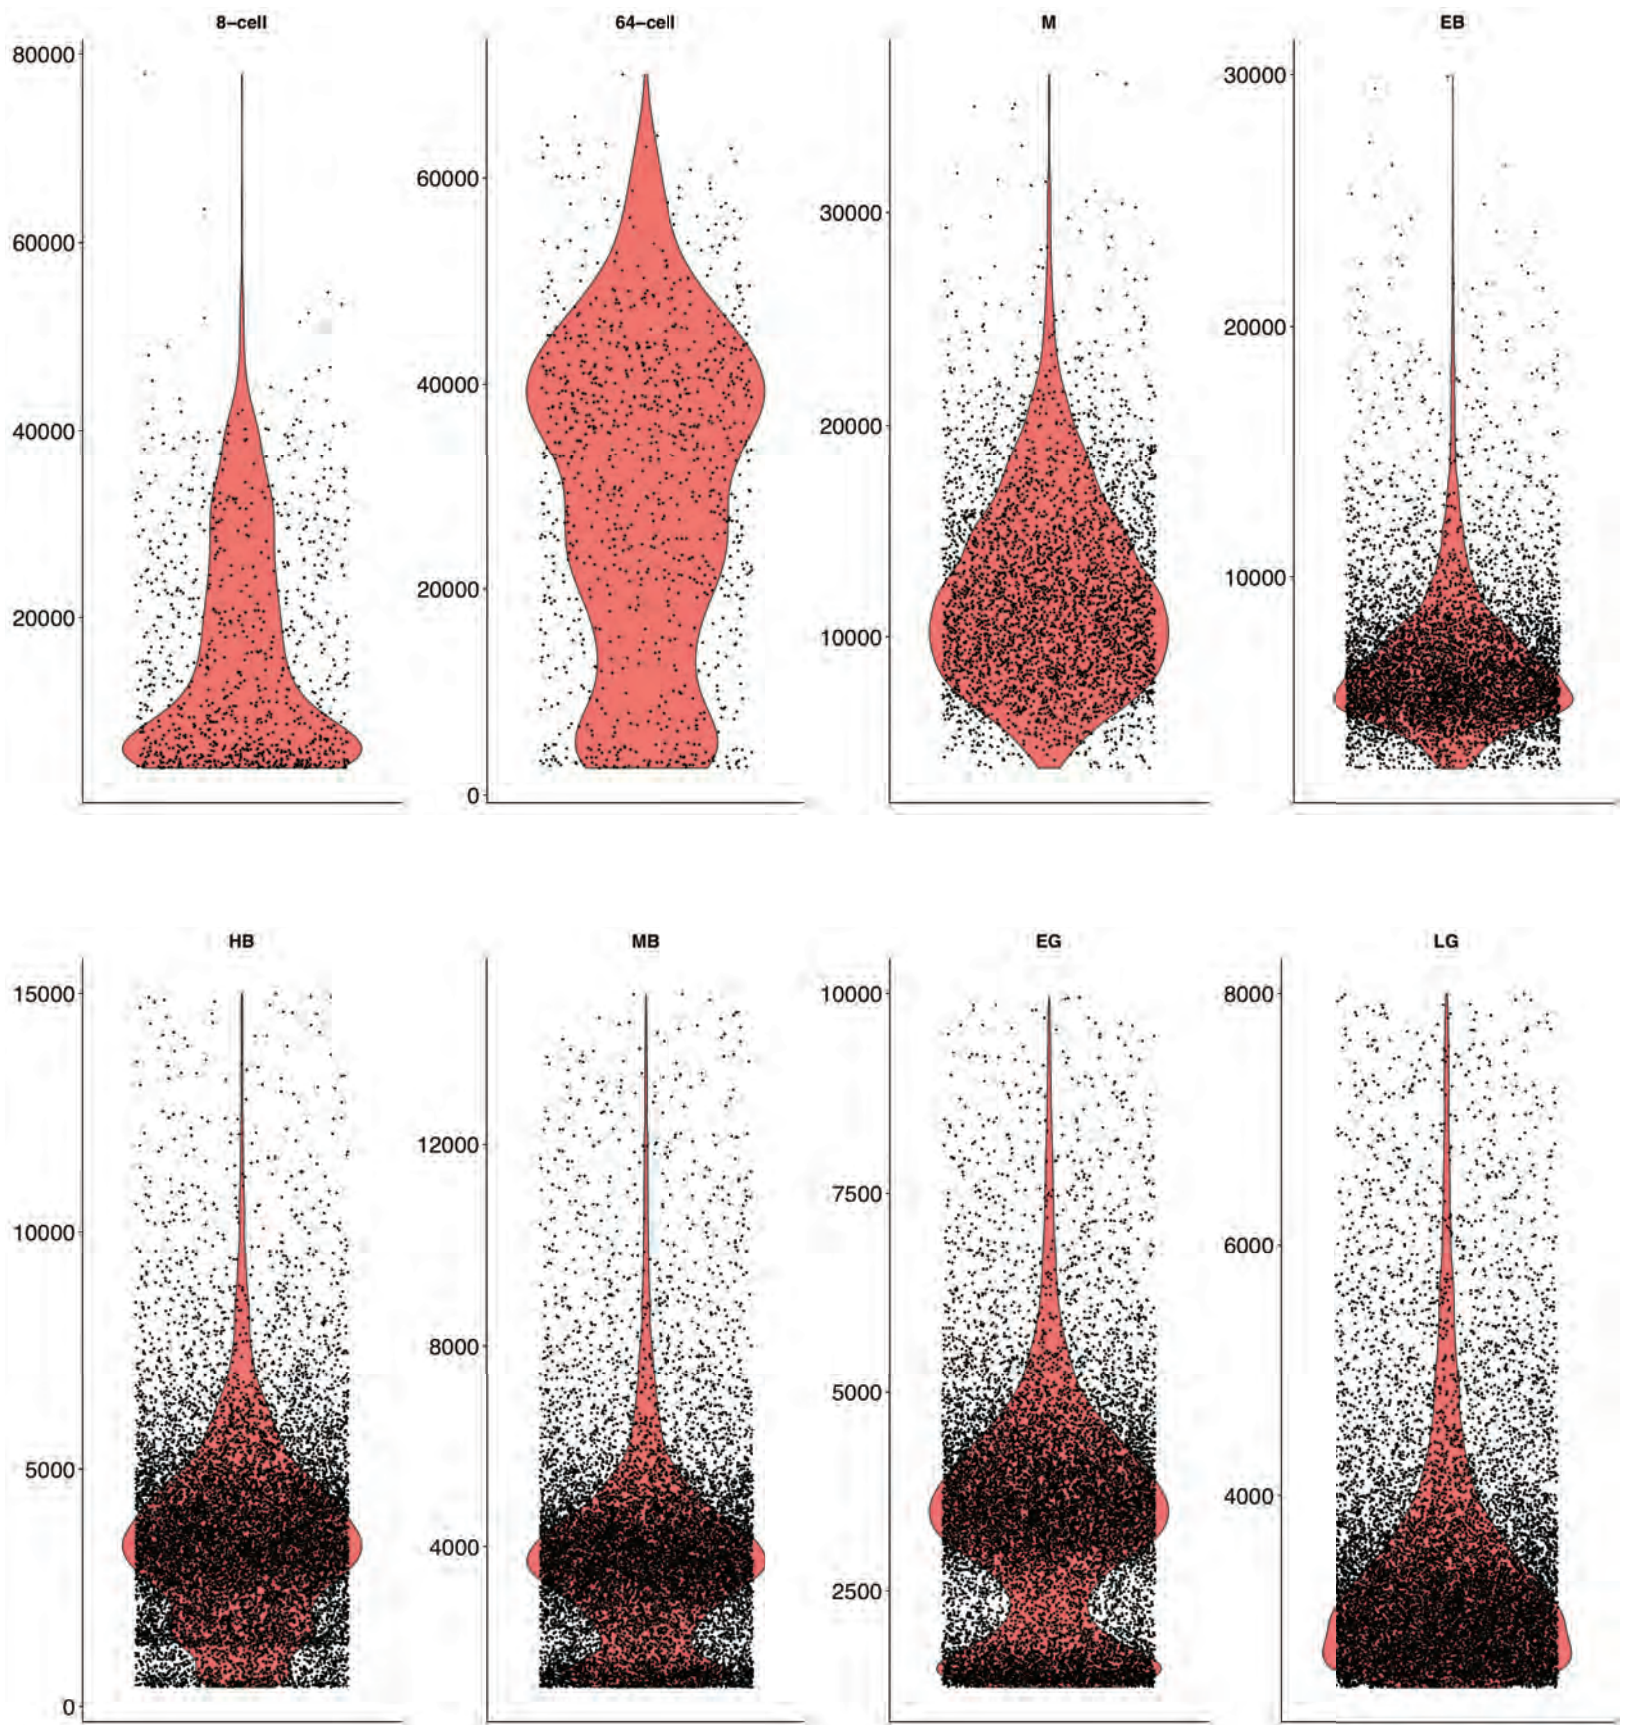

Fig. S3. Total UMIs detected per cell across developmental time points.

Fig. S4: SoxB2

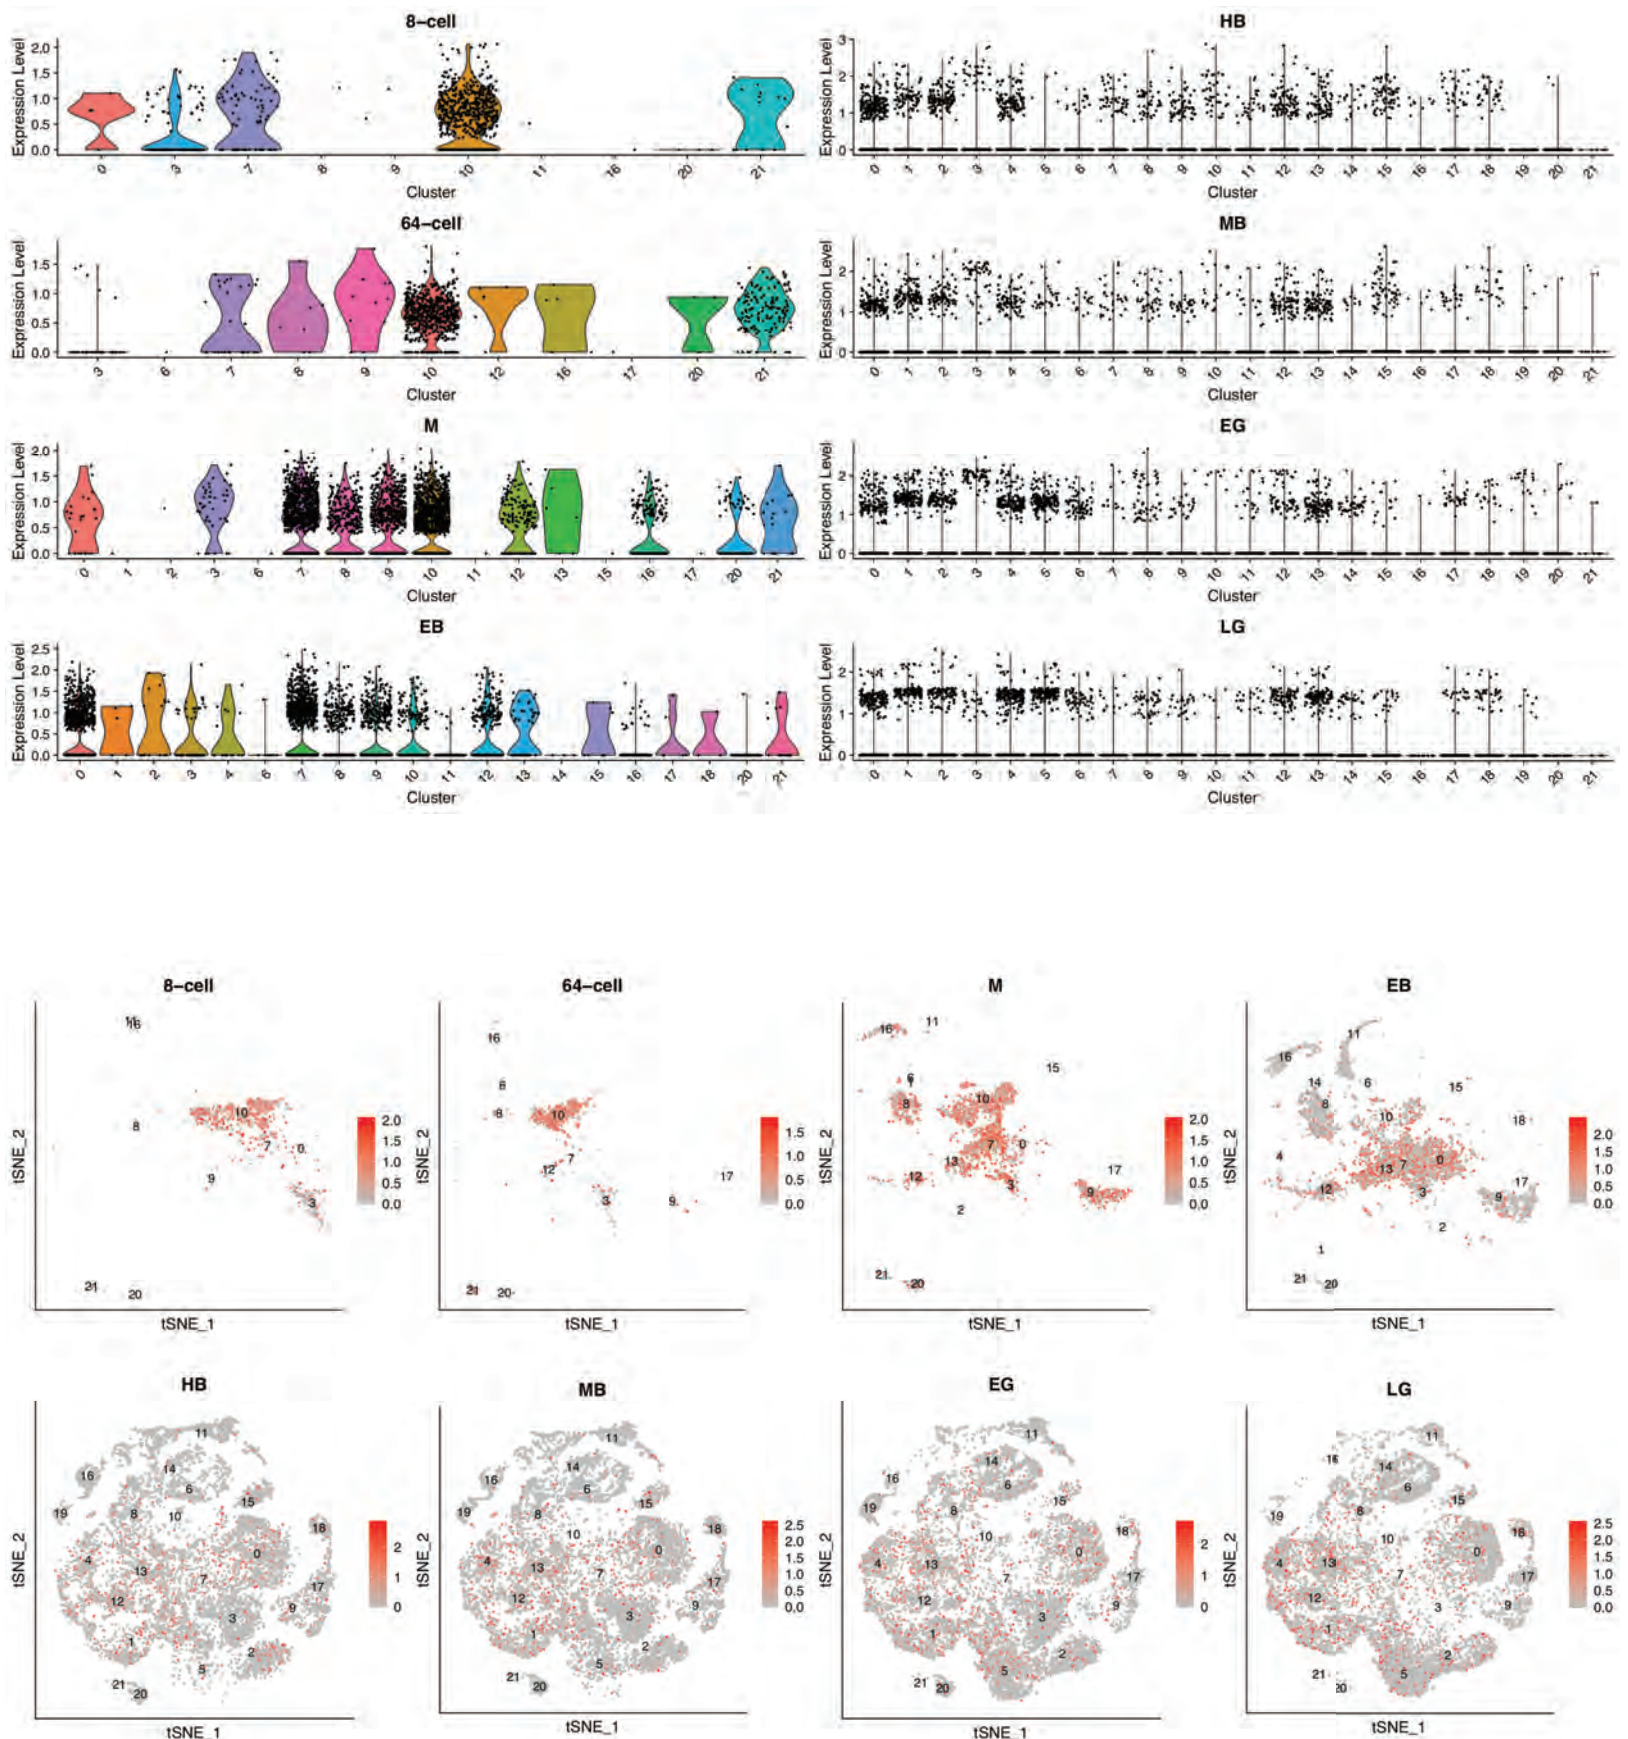

Fig. S4-S7. Violin plots showing expression across different clusters at each developmental stage. Normalized gene expression values at log scale shown per cell cluster identity for each developmental time point. Plots depict probability density at different expression levels. Feature plots showing expression across different clusters at each developmental stage.





Fig. S6: FoxA

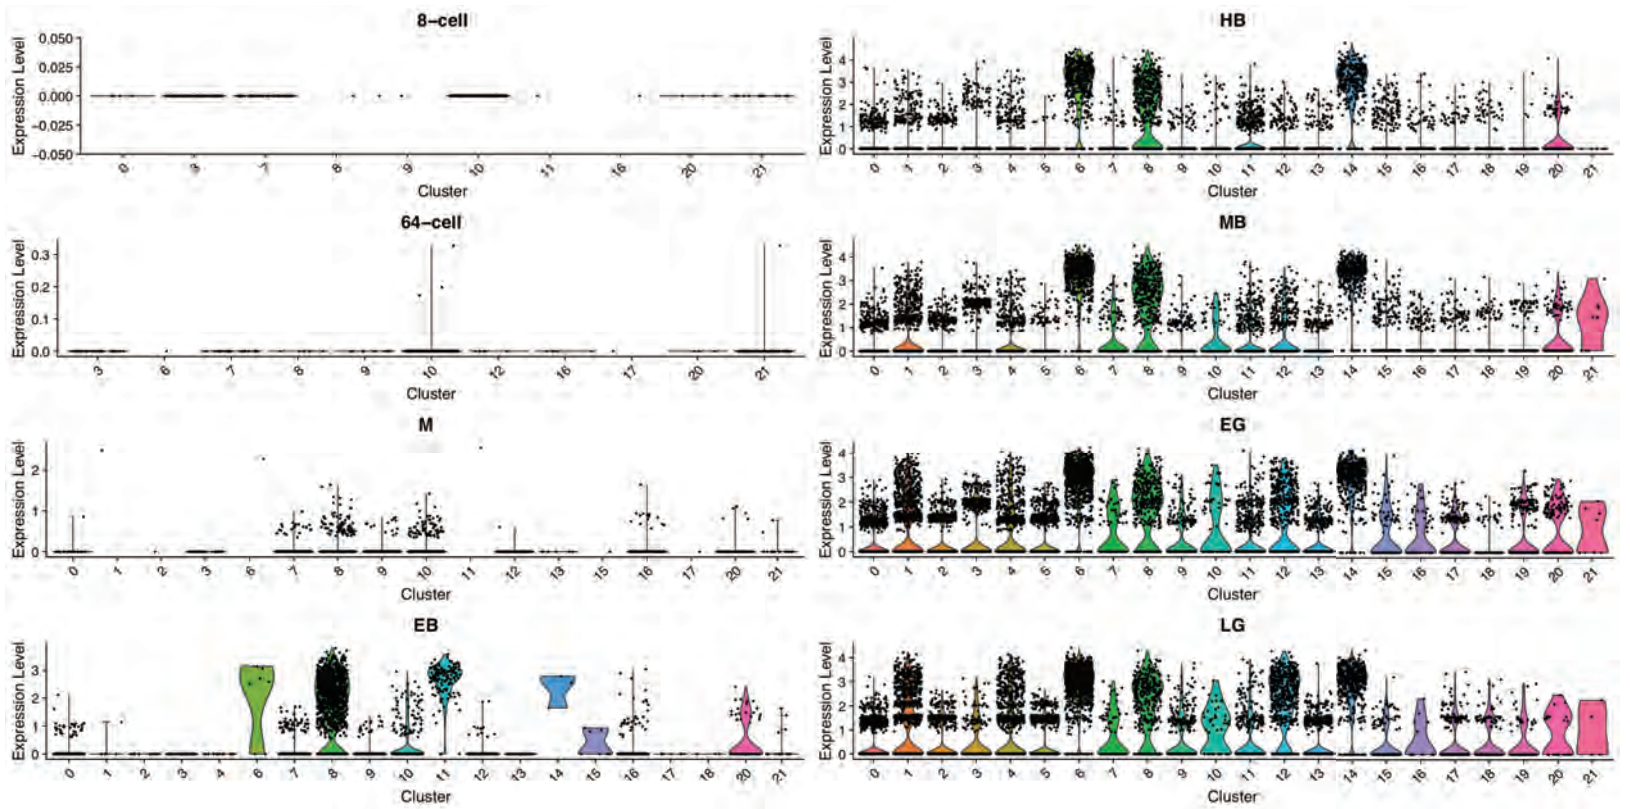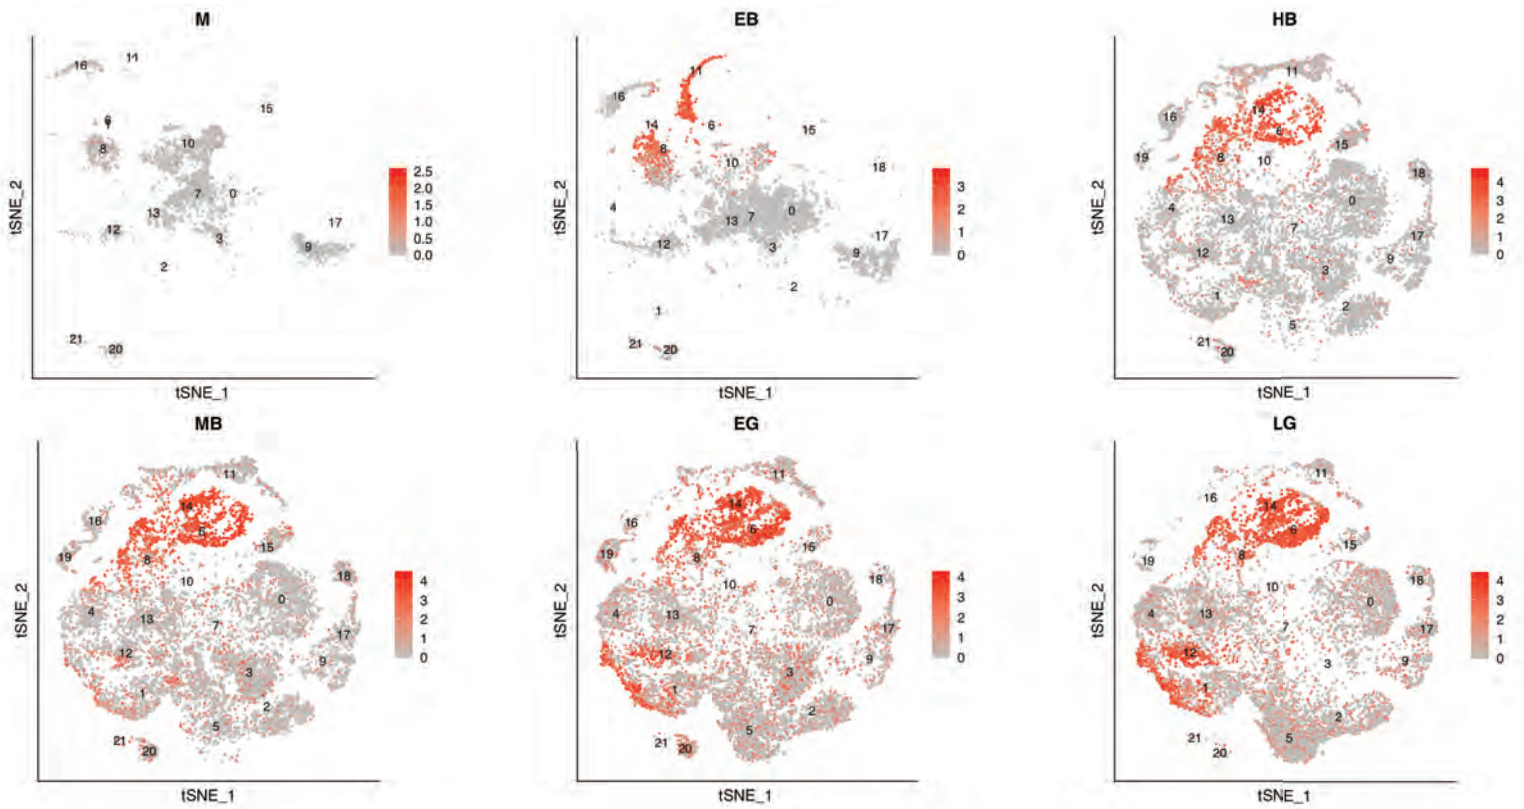

Fig. S7: Endo16

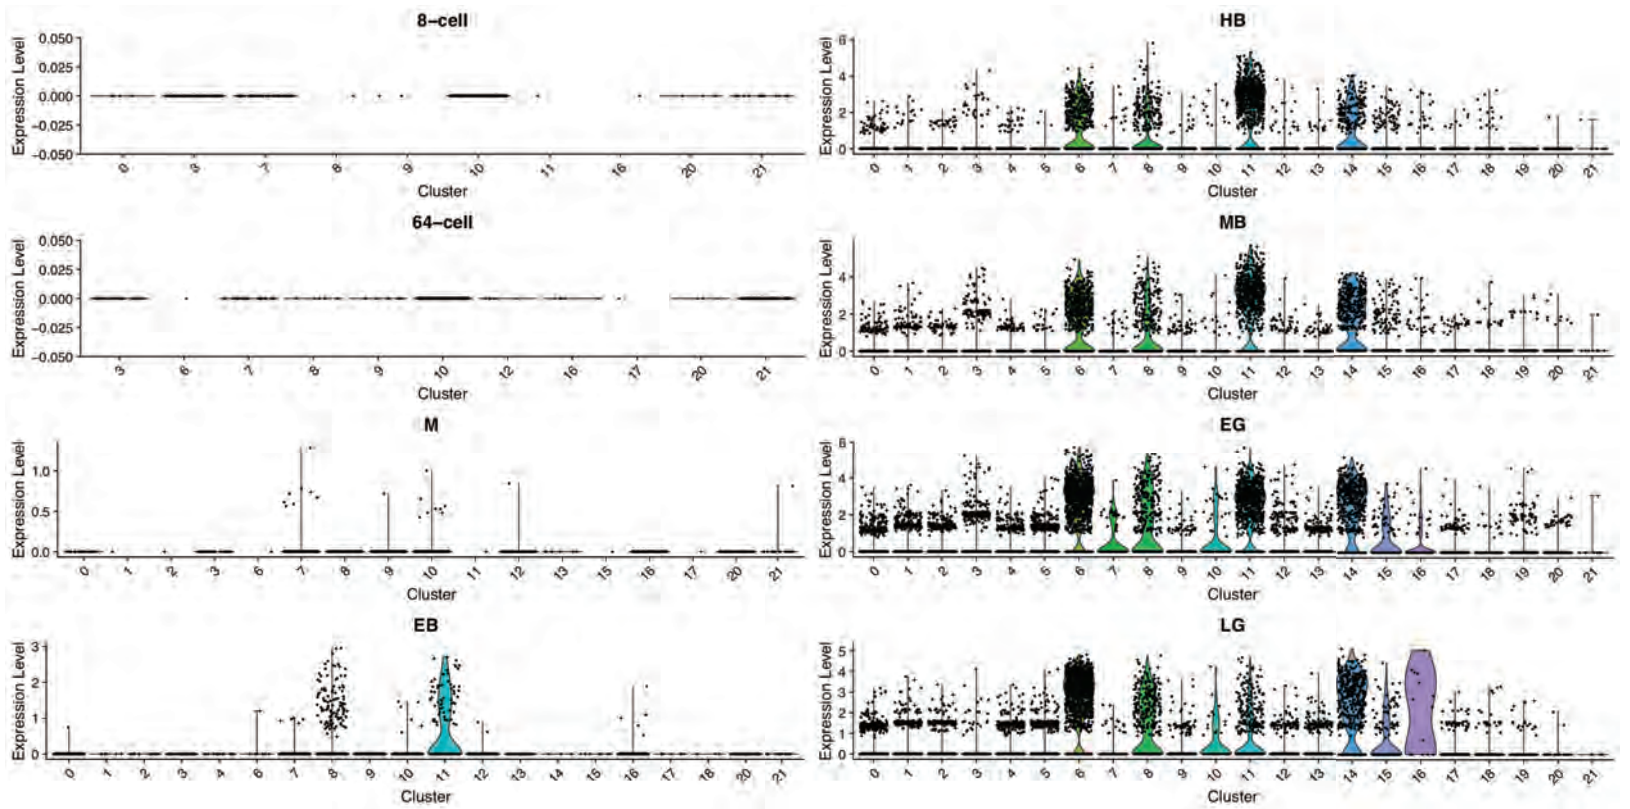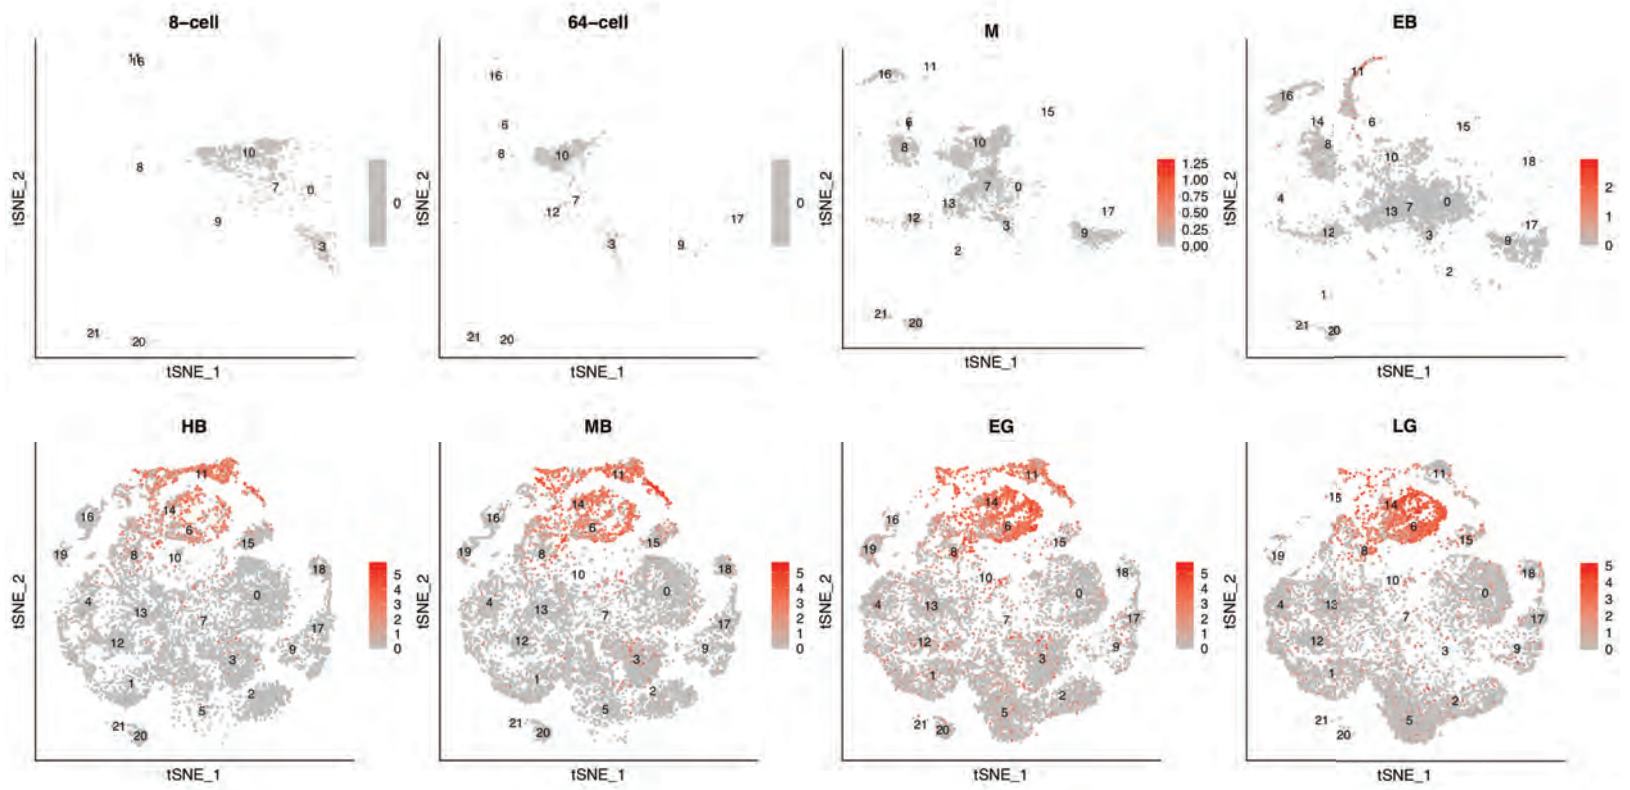

Fig. S8

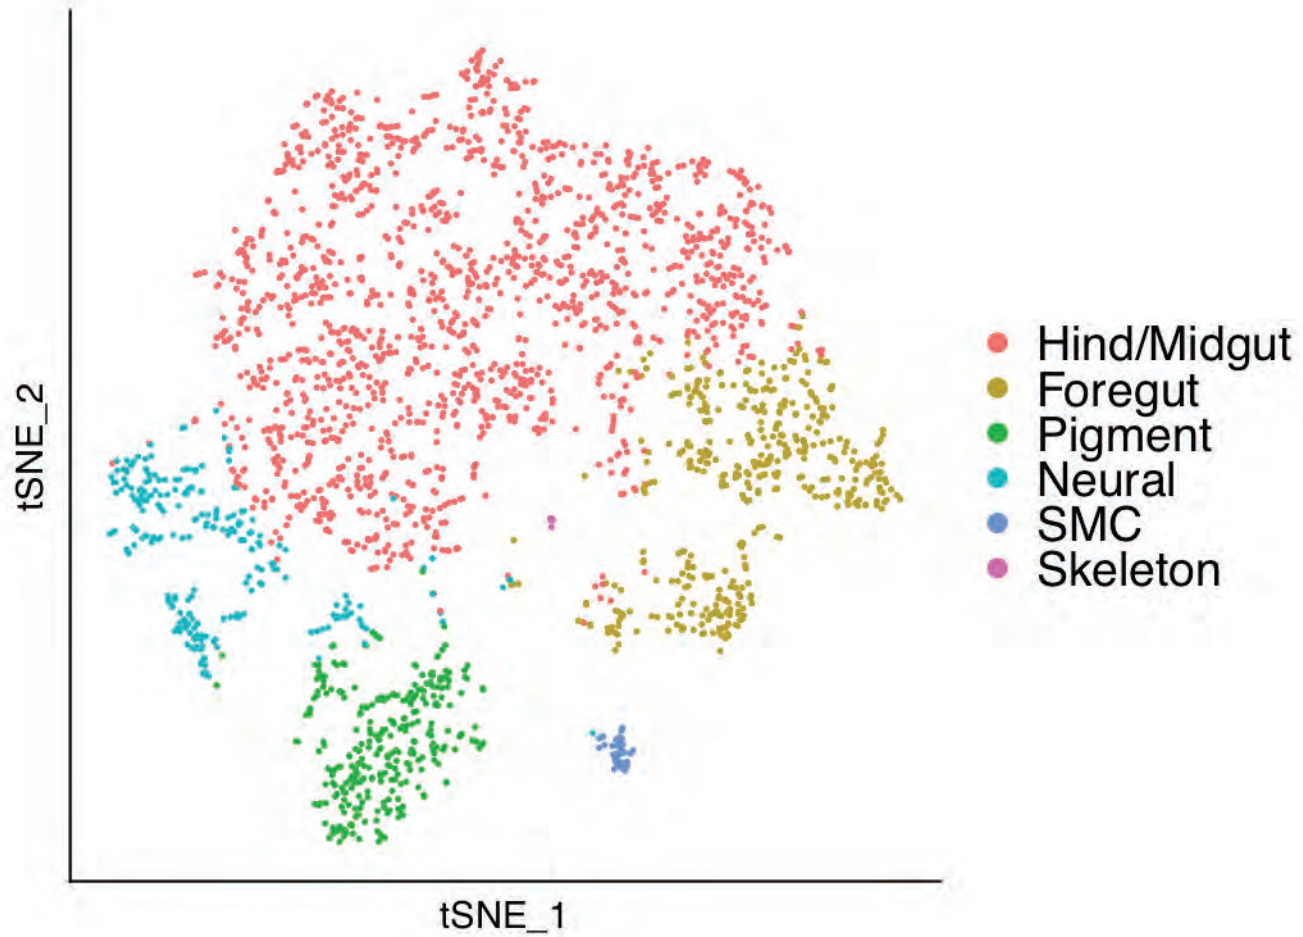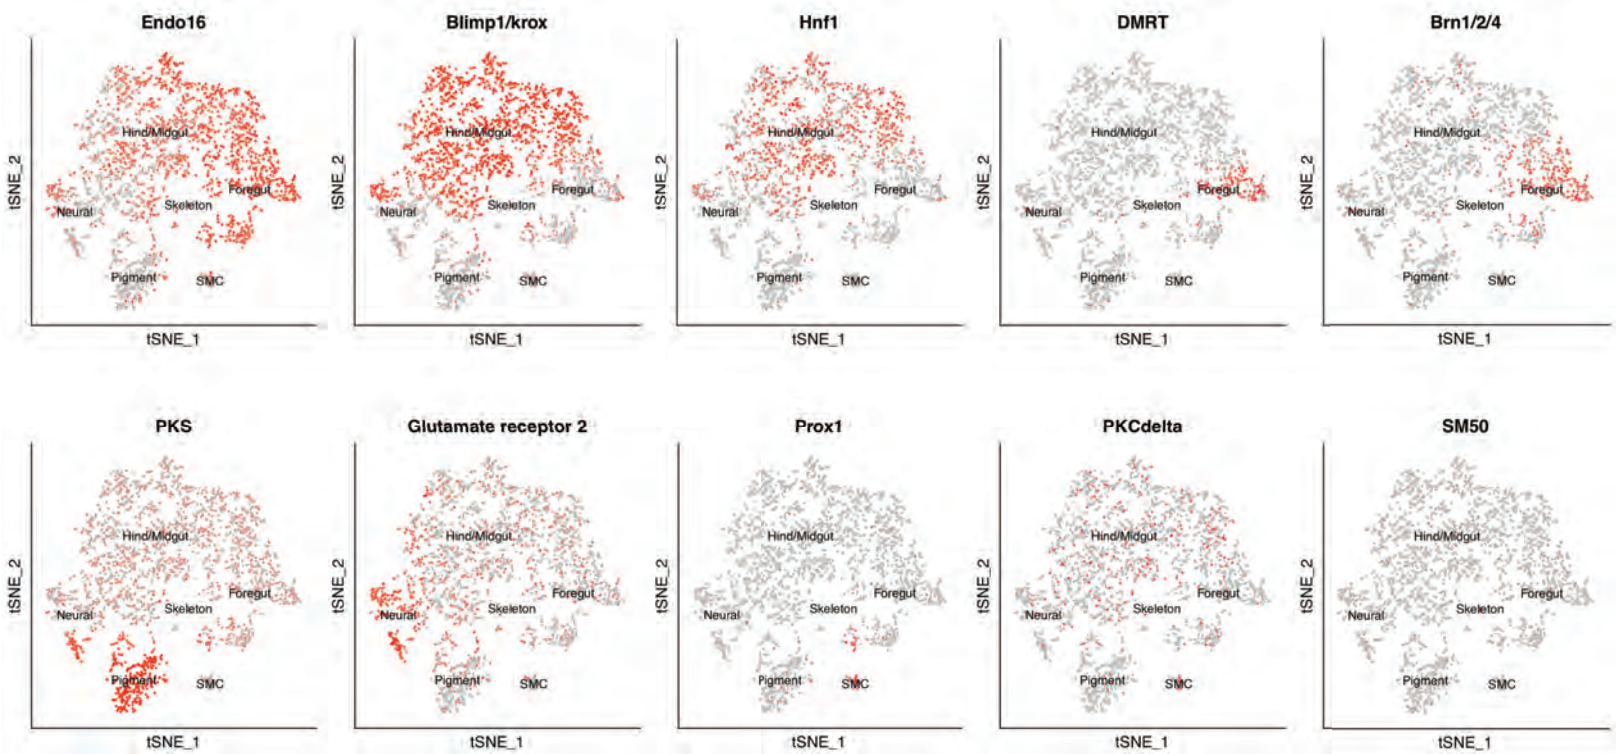

Fig. S8. Subclustering of gut clusters at late gastrula. Endo16-positive clusters 6, 8, 11, and 14 subcluster into seven cell types. Feature plots highlighting subcluster marker genes.

Fig. S9: Alx1

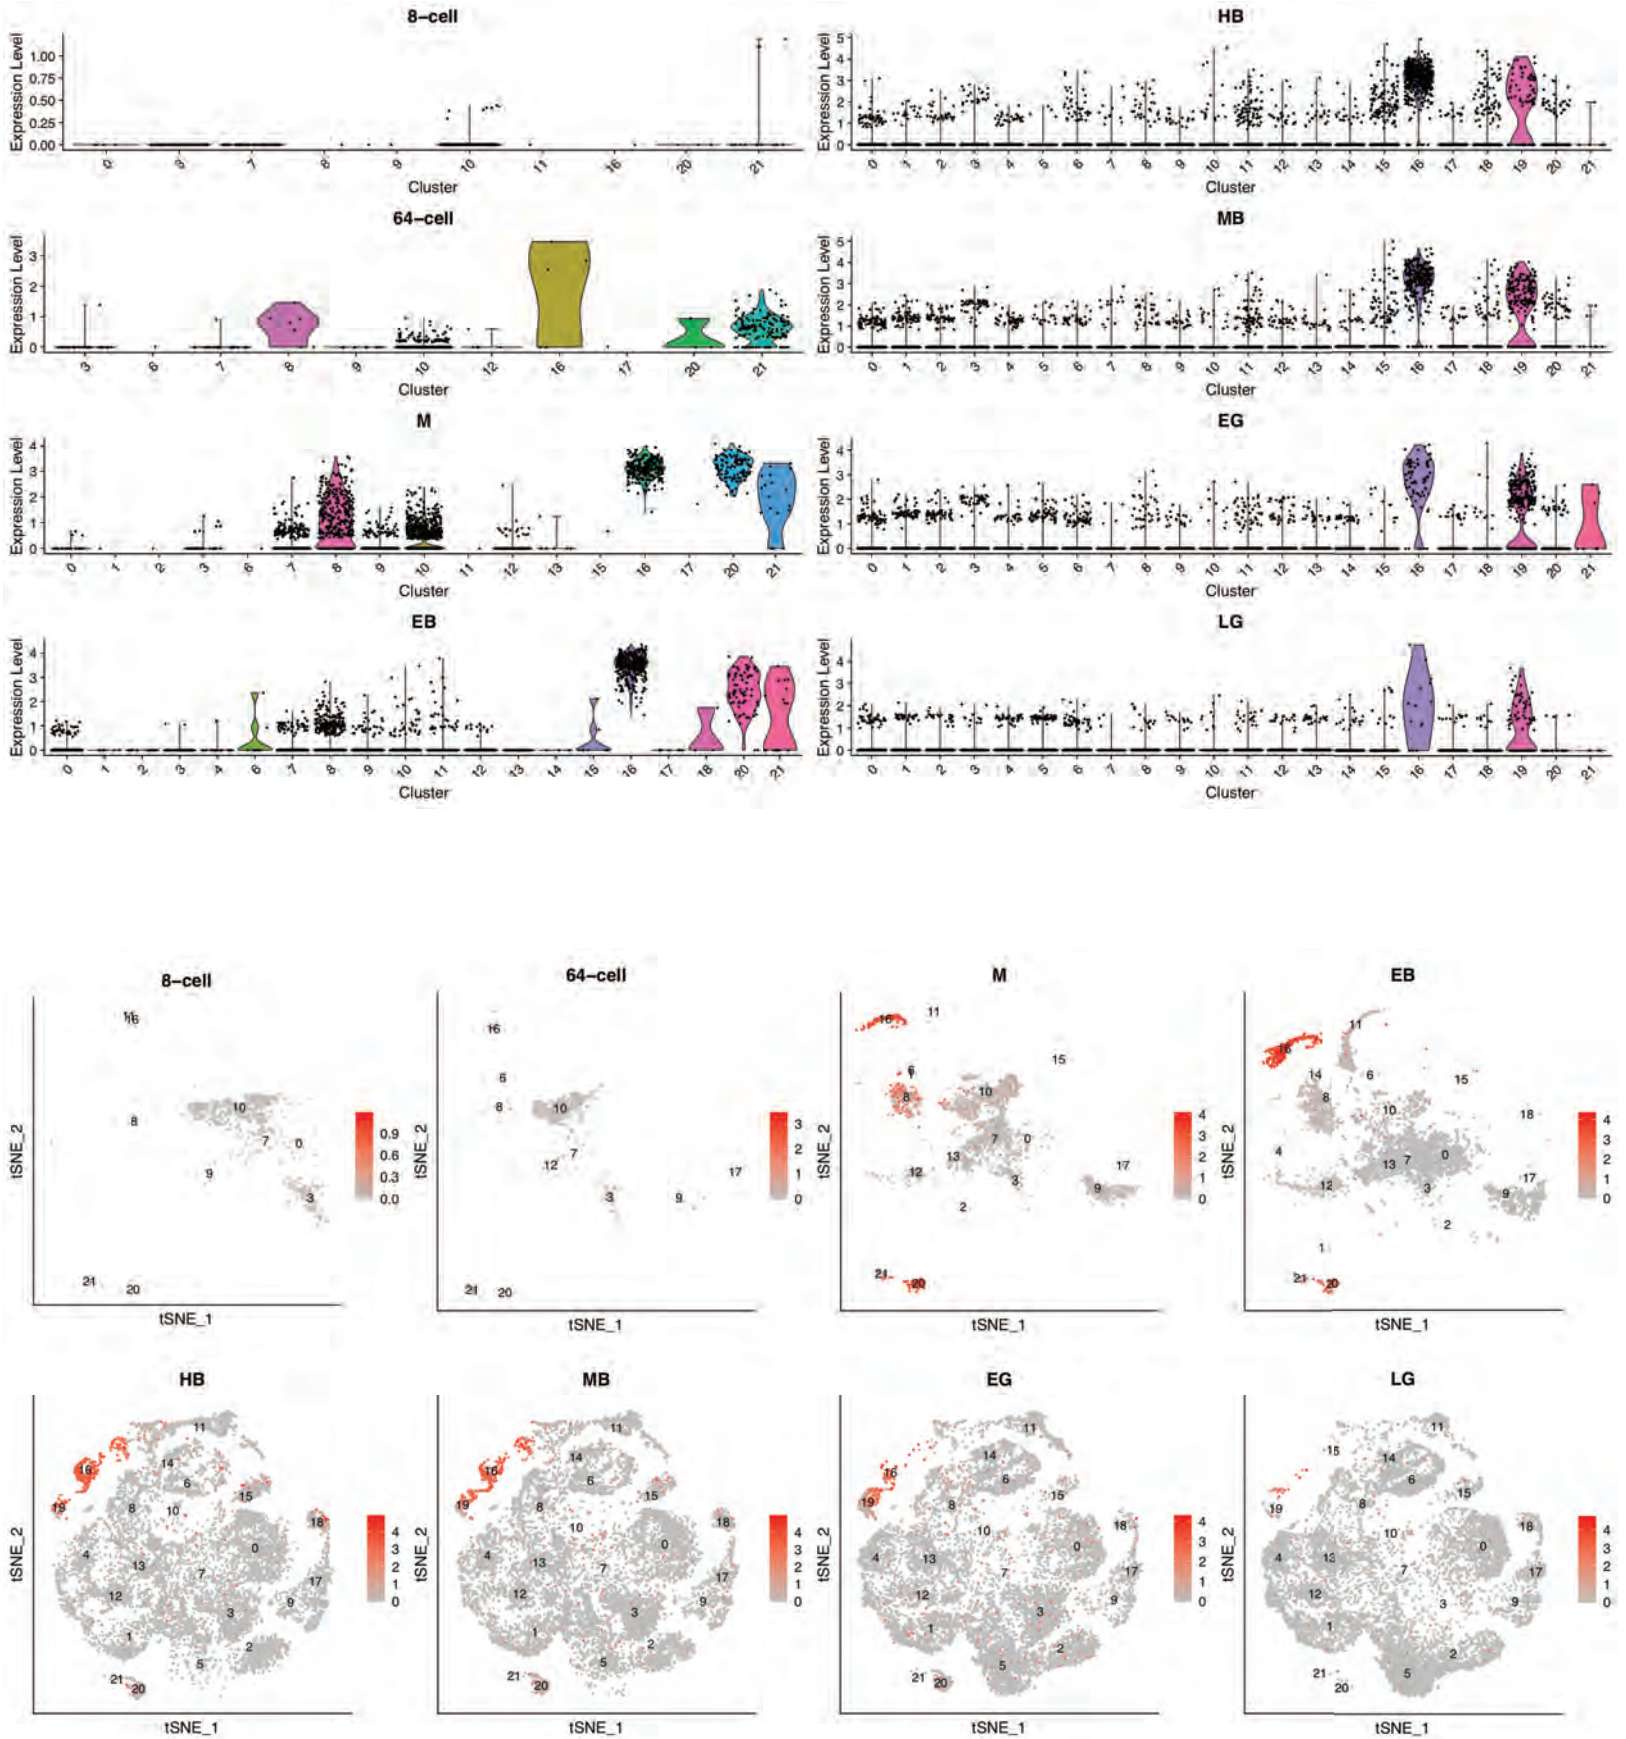

Fig. S9-S15, S17-24. Violin plots showing expression across different clusters at each developmental stage. Normalized gene expression values at log scale shown per cell cluster identity for each developmental time point. Plots depict probability density at different expression levels. Feature plots showing expression across different clusters at each developmental stage.

Fig. S10: SM50

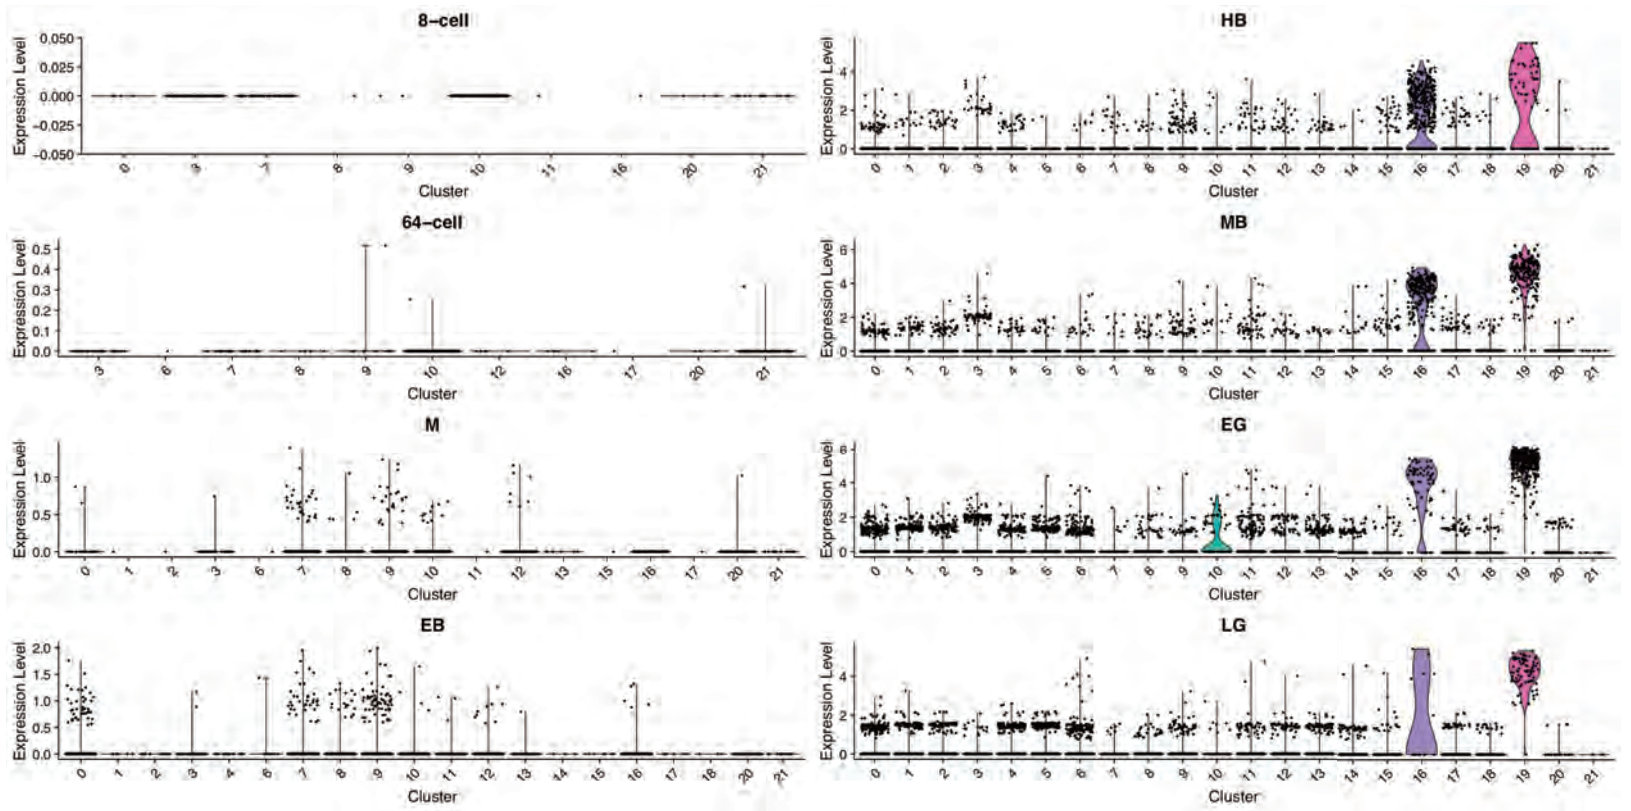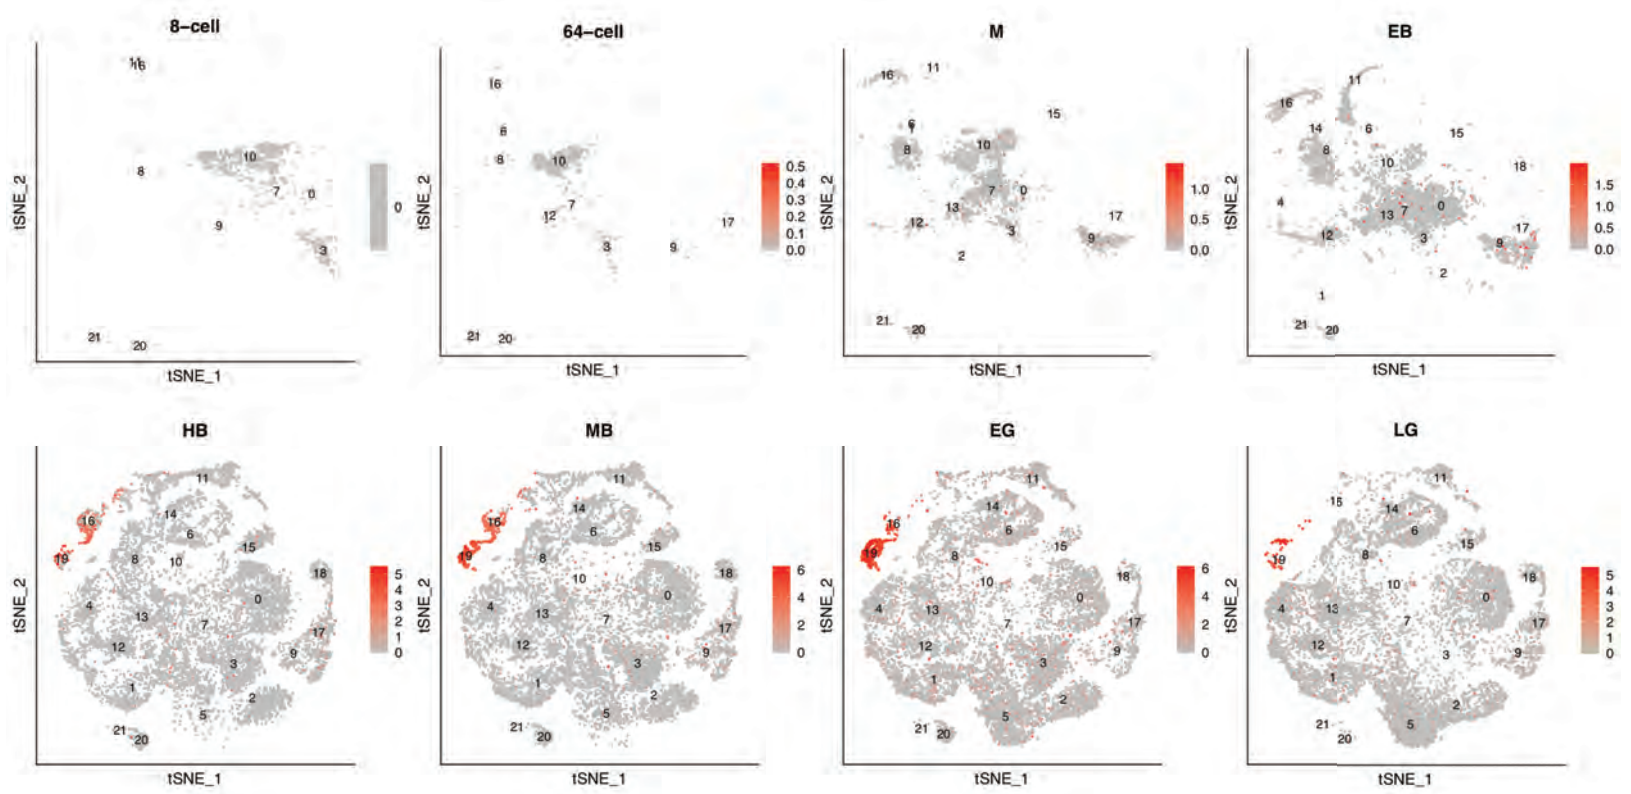

Fig. S11: SM37

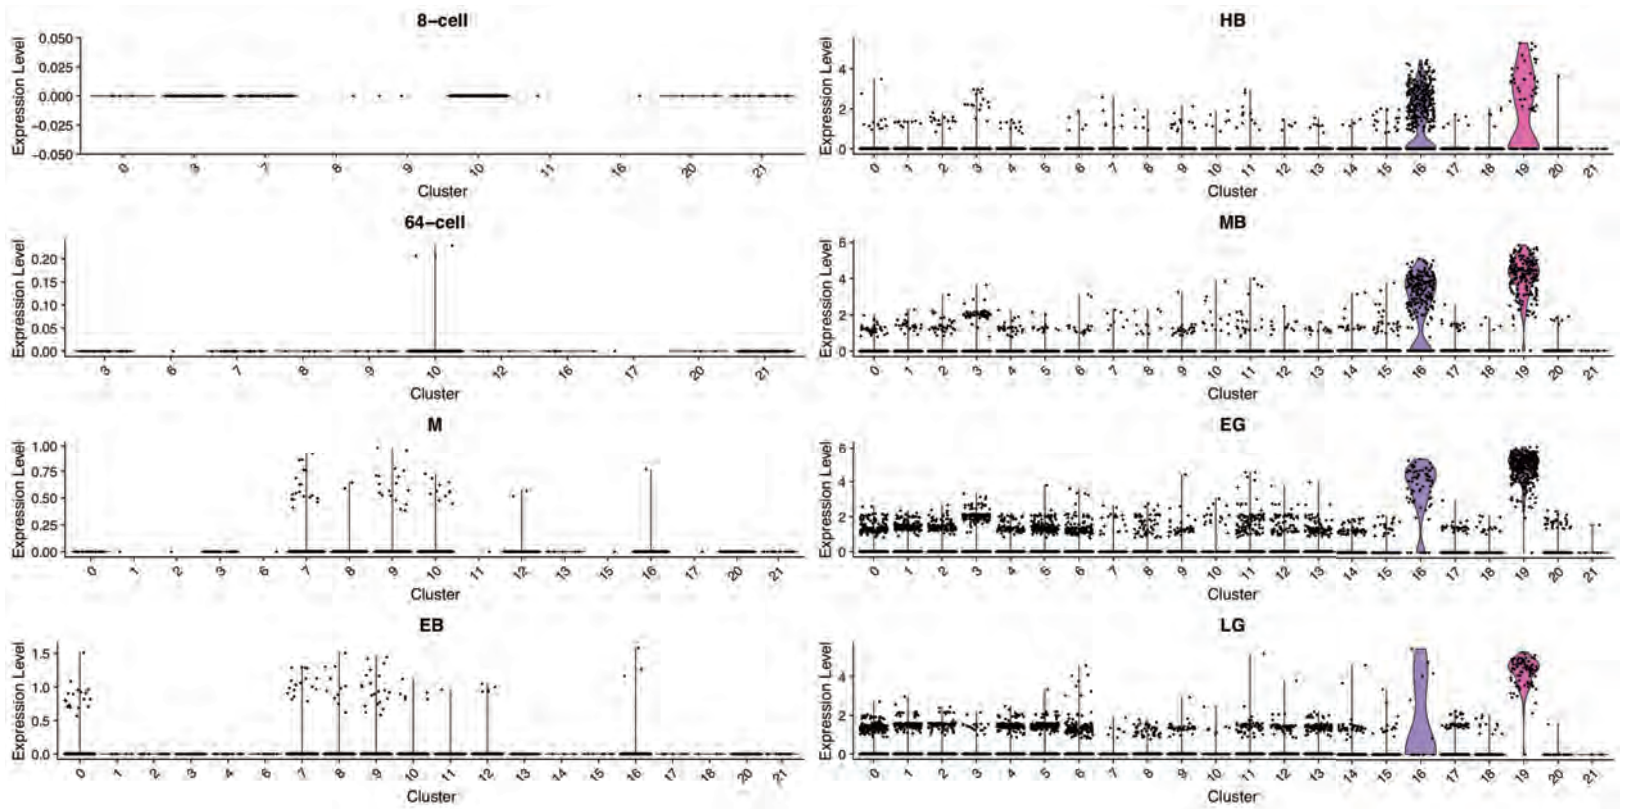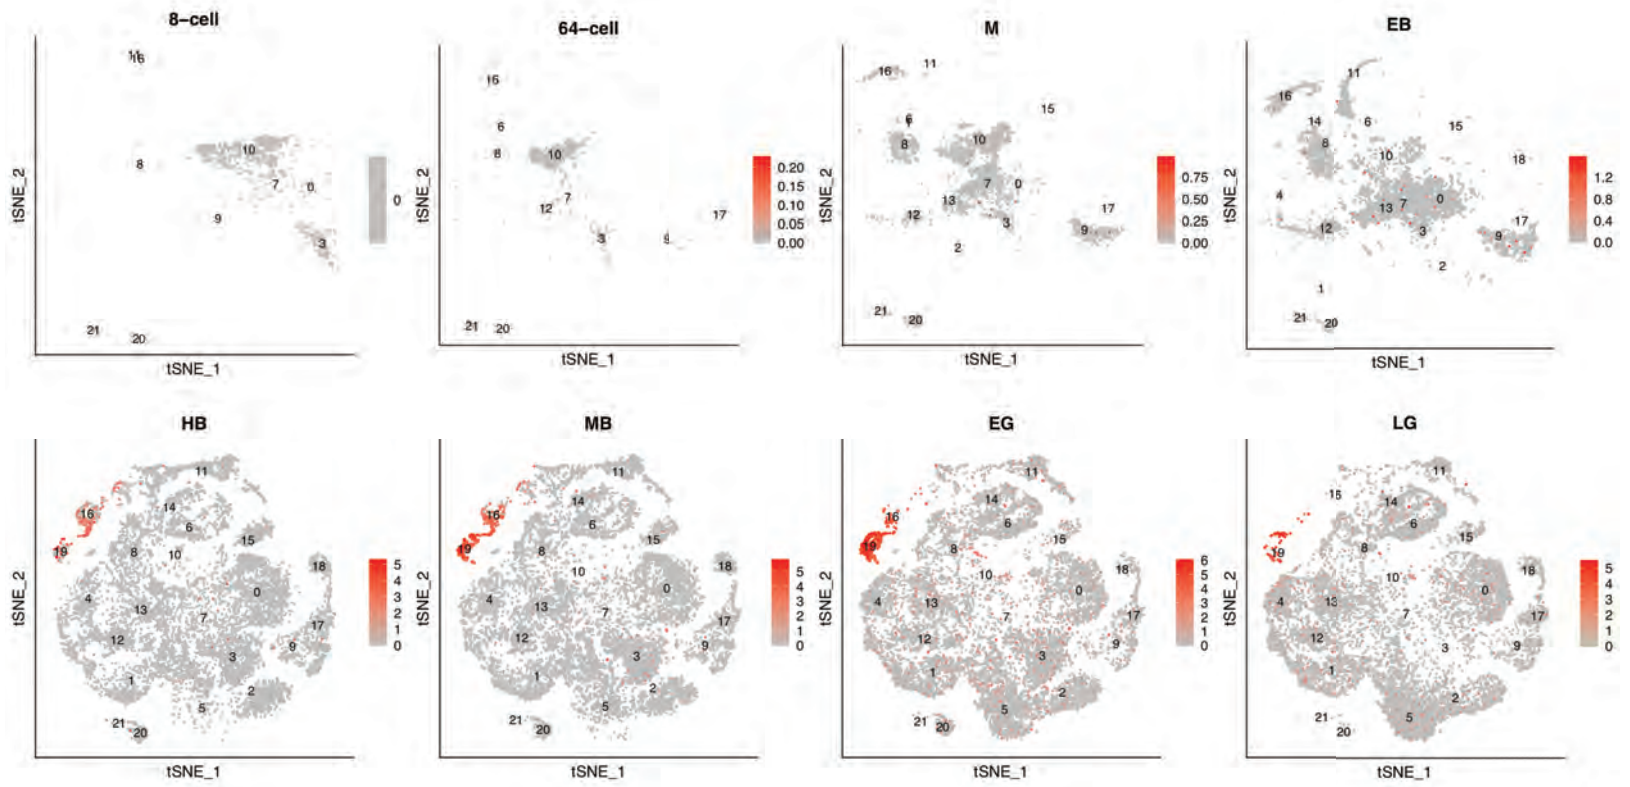

## Fig. S12

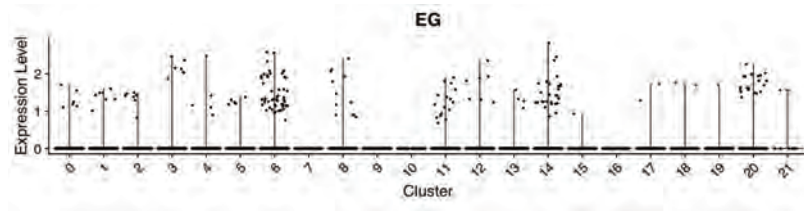

Fig. S12. Violin plot showing enriched expression of FoxY at early gastrula stage in clusters 6, 14, and 20.



Fig. S13: H2A.2.1

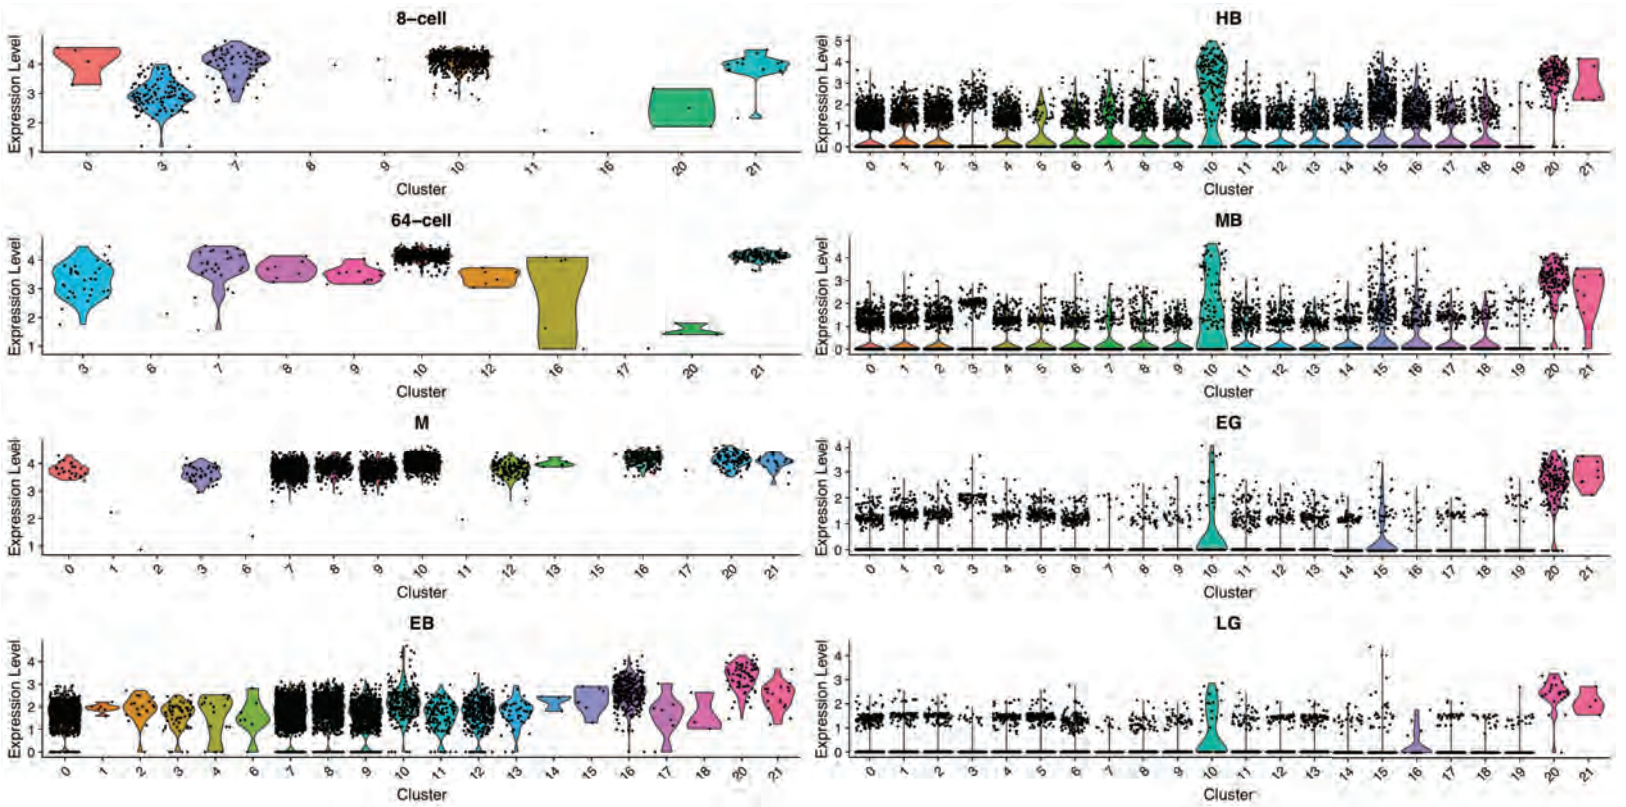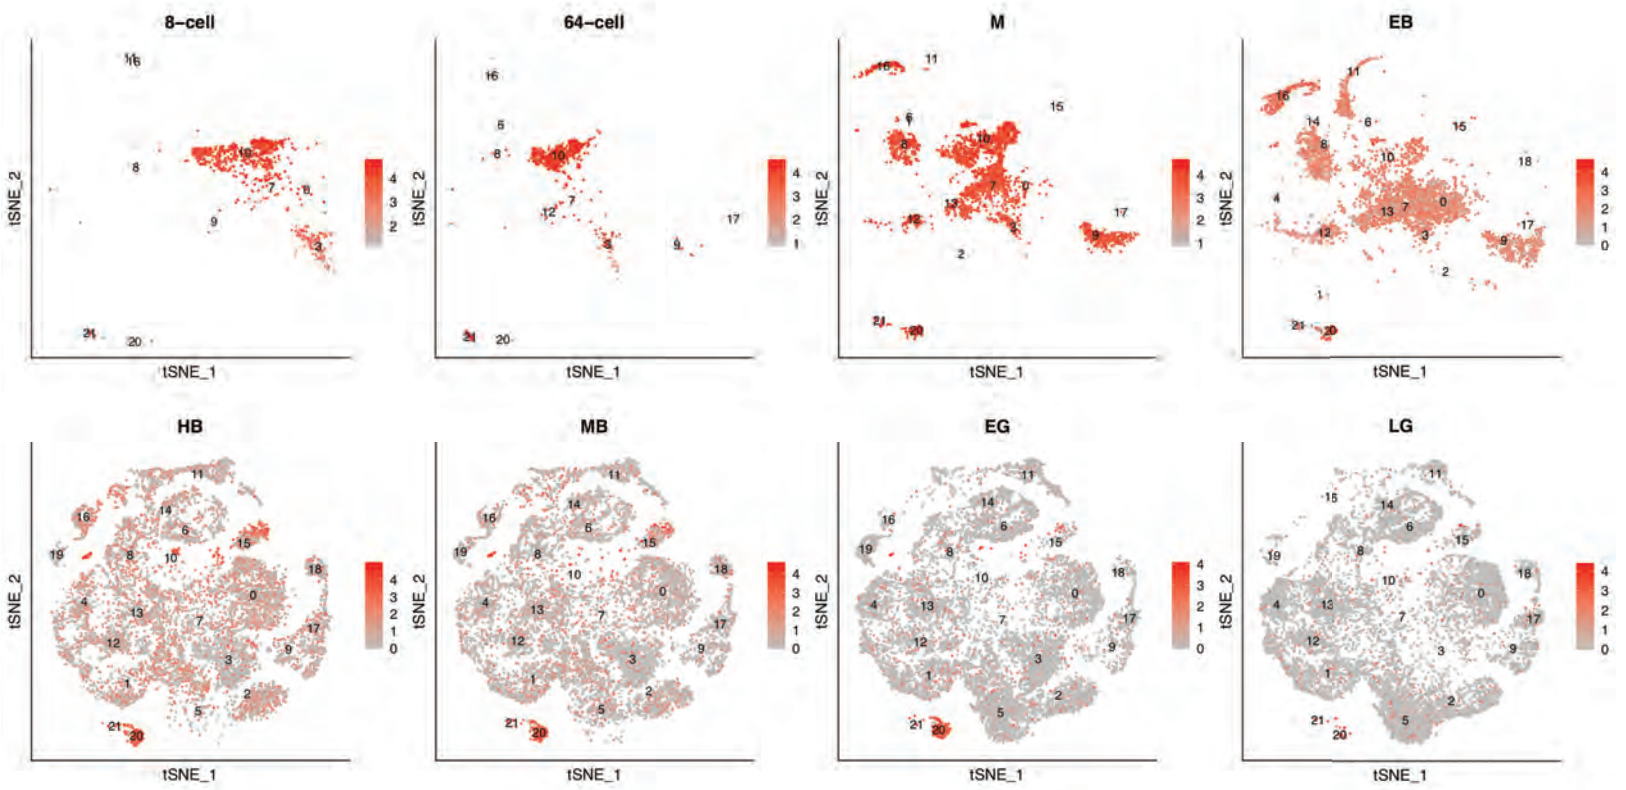

Fig. S14: Vasa

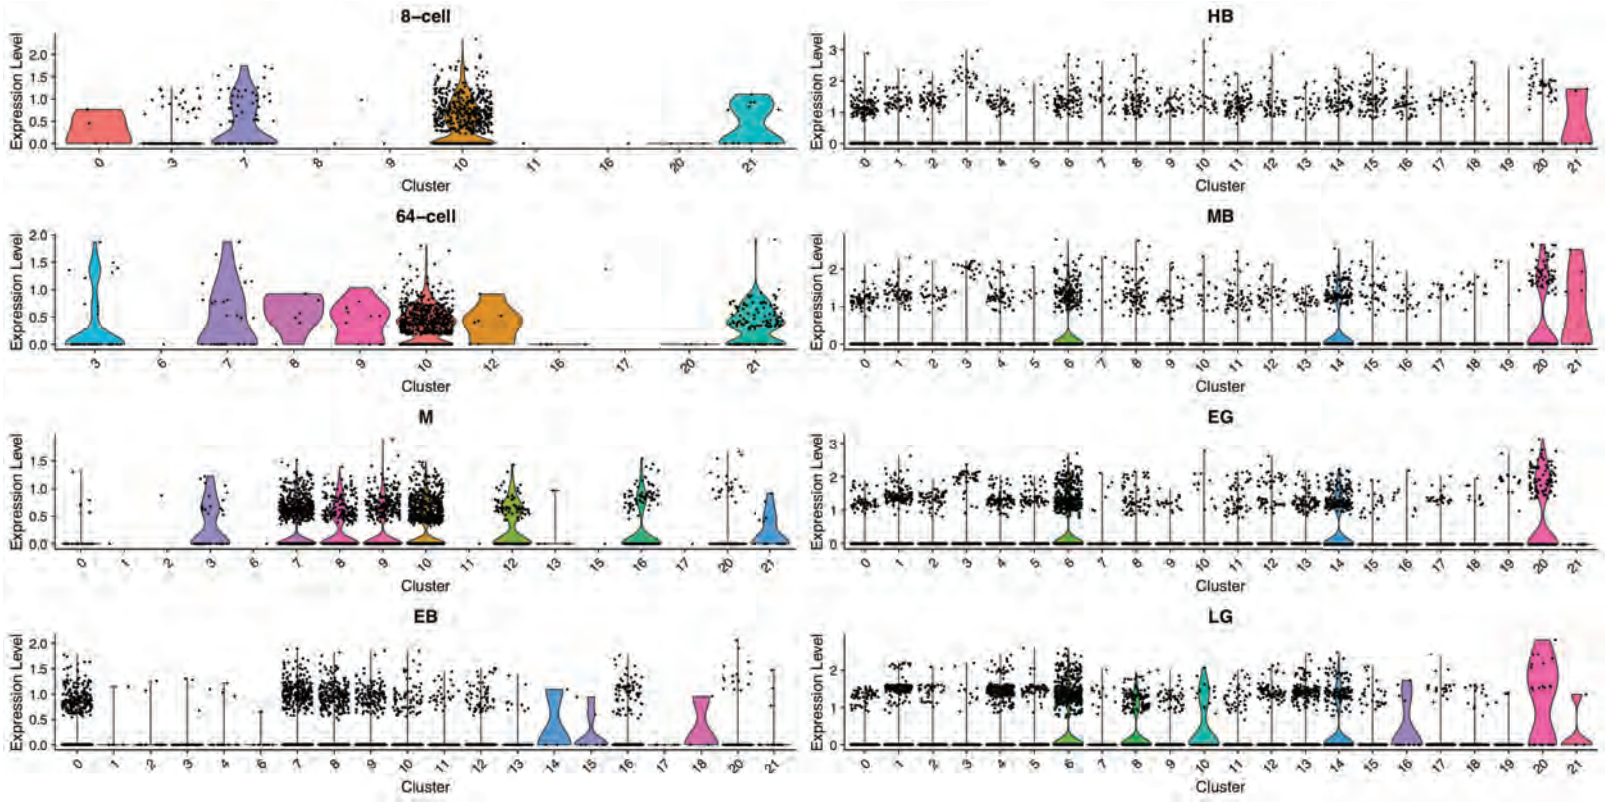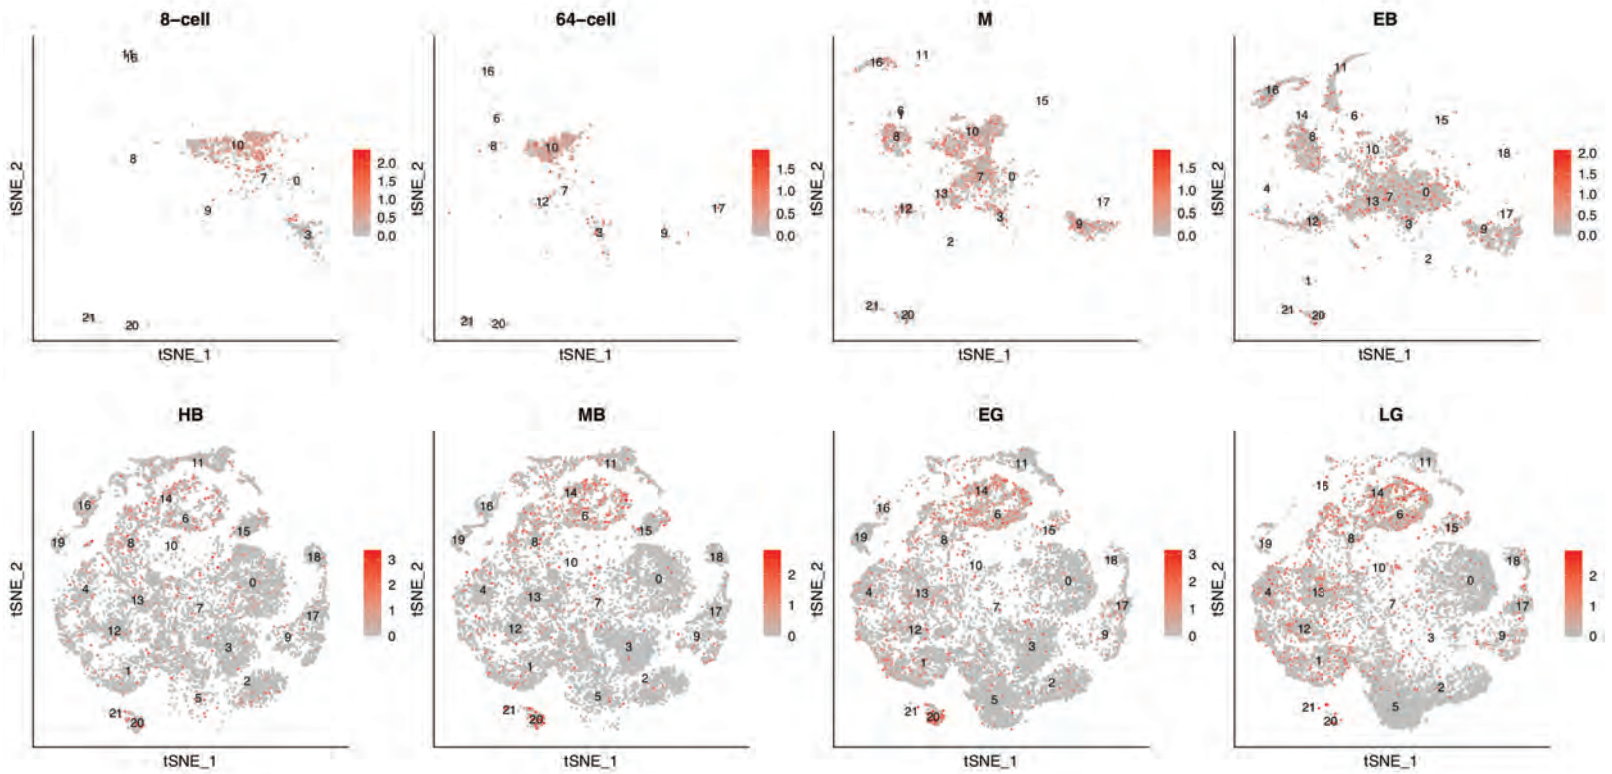

Fig. S15: Seawi

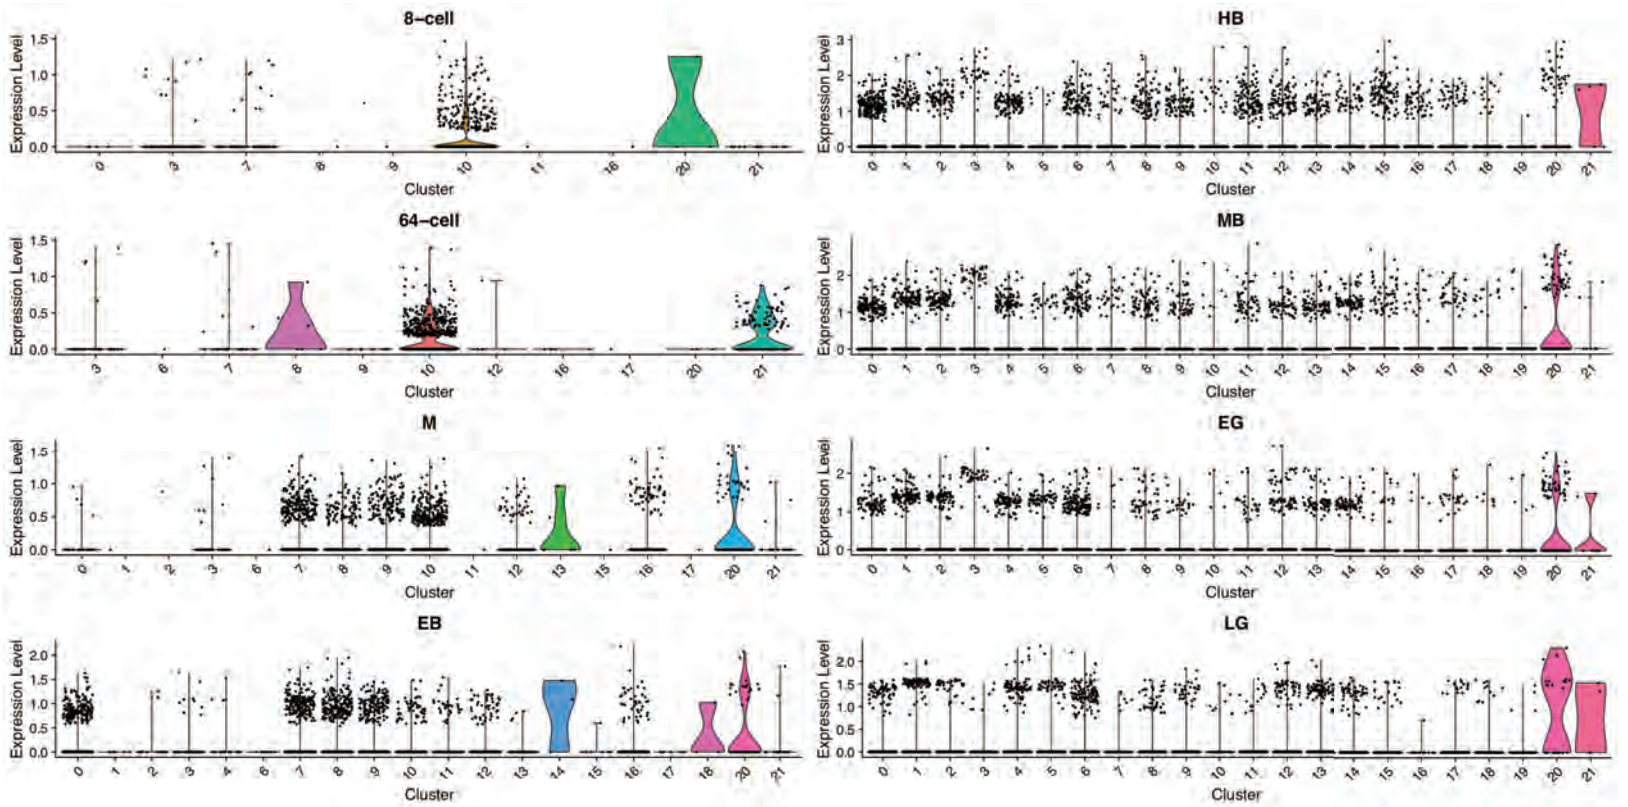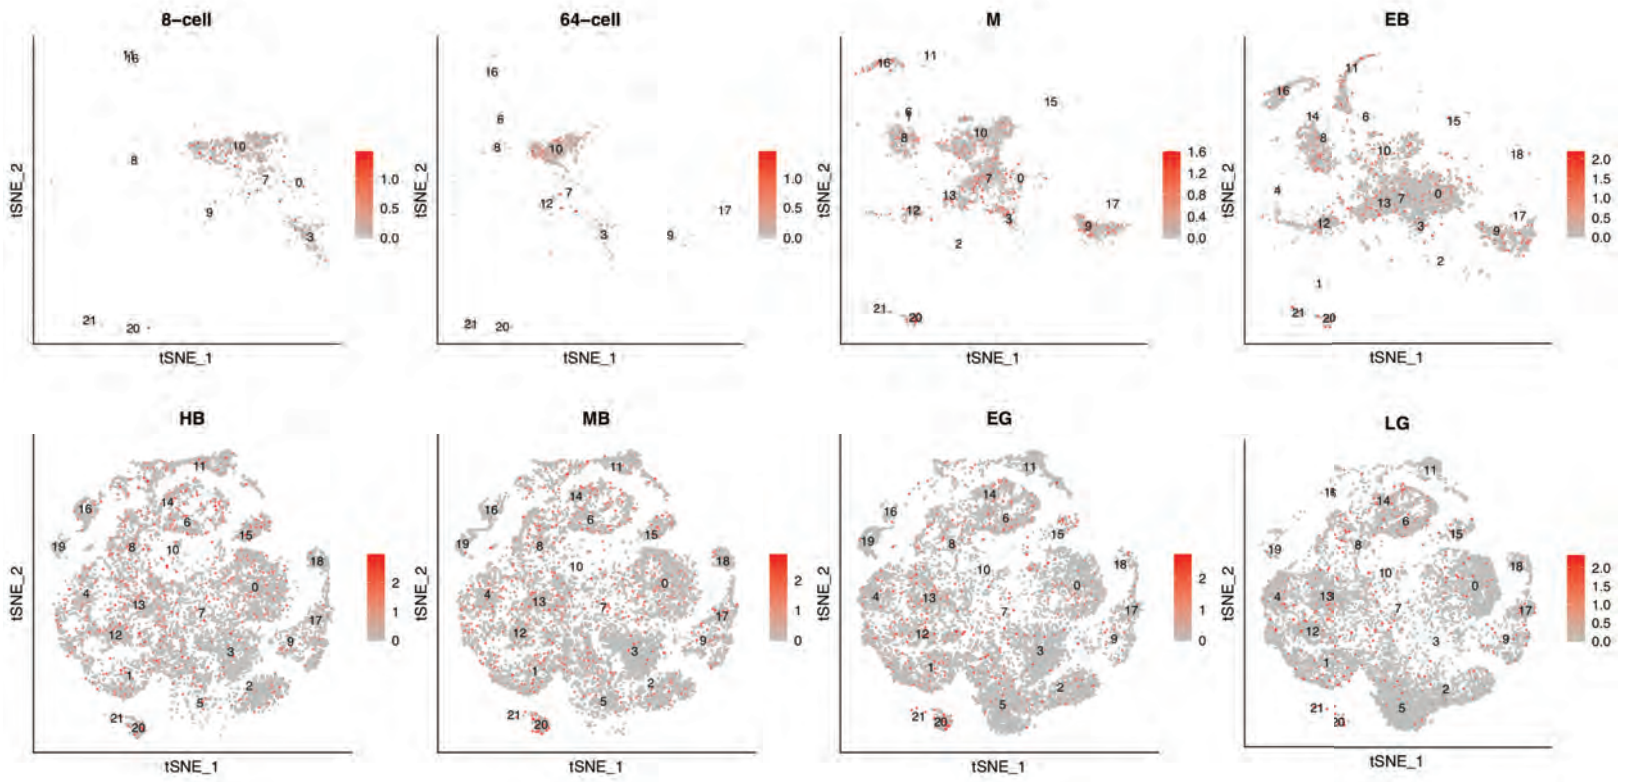

Fig. S16

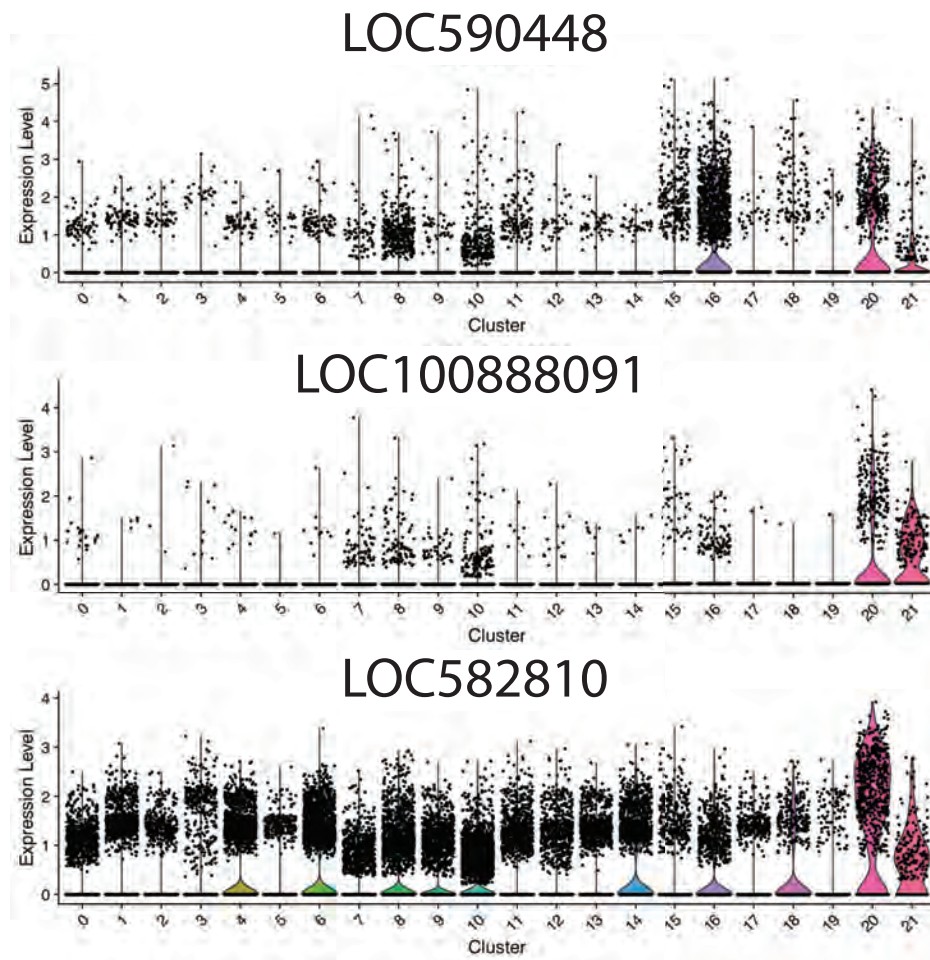

Fig. S16. Violin plots showing enrichment of uncharacterized transcripts in germline cluster 20.

Fig S13: Kruppel

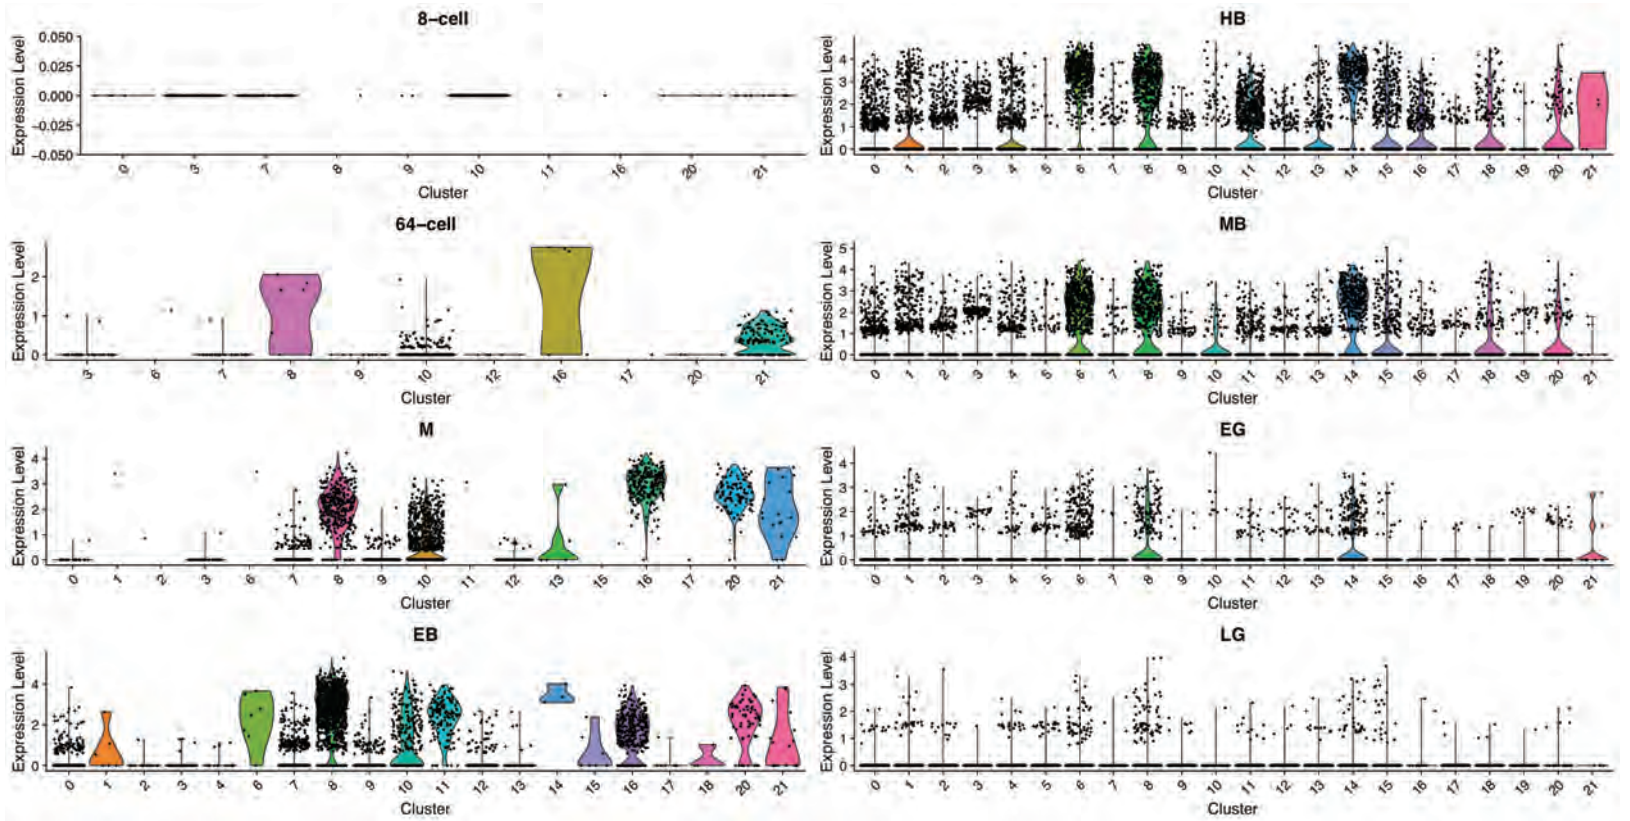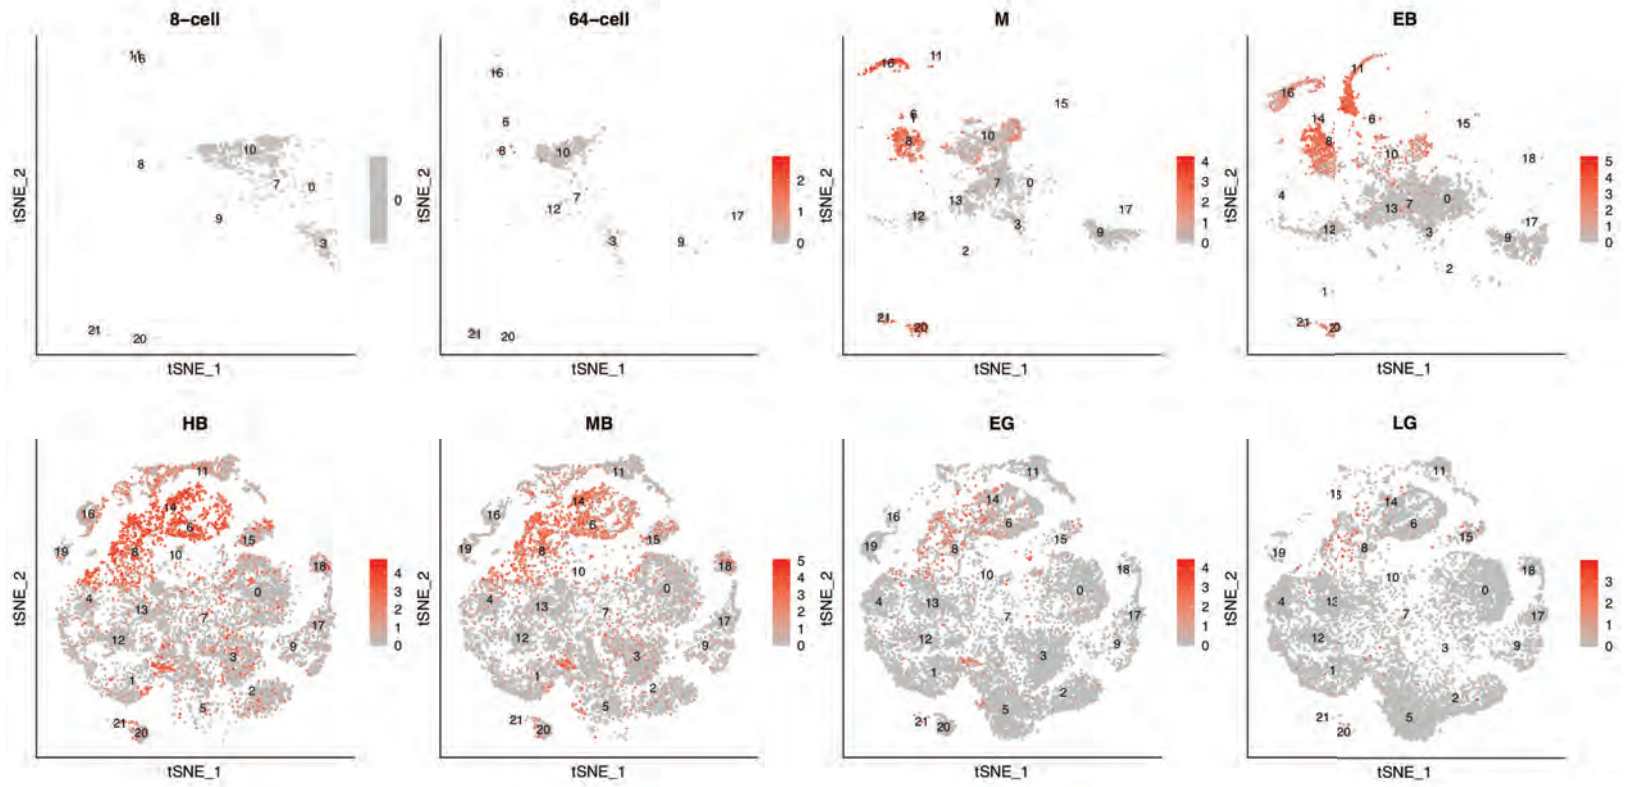

Fig. S18: Odz

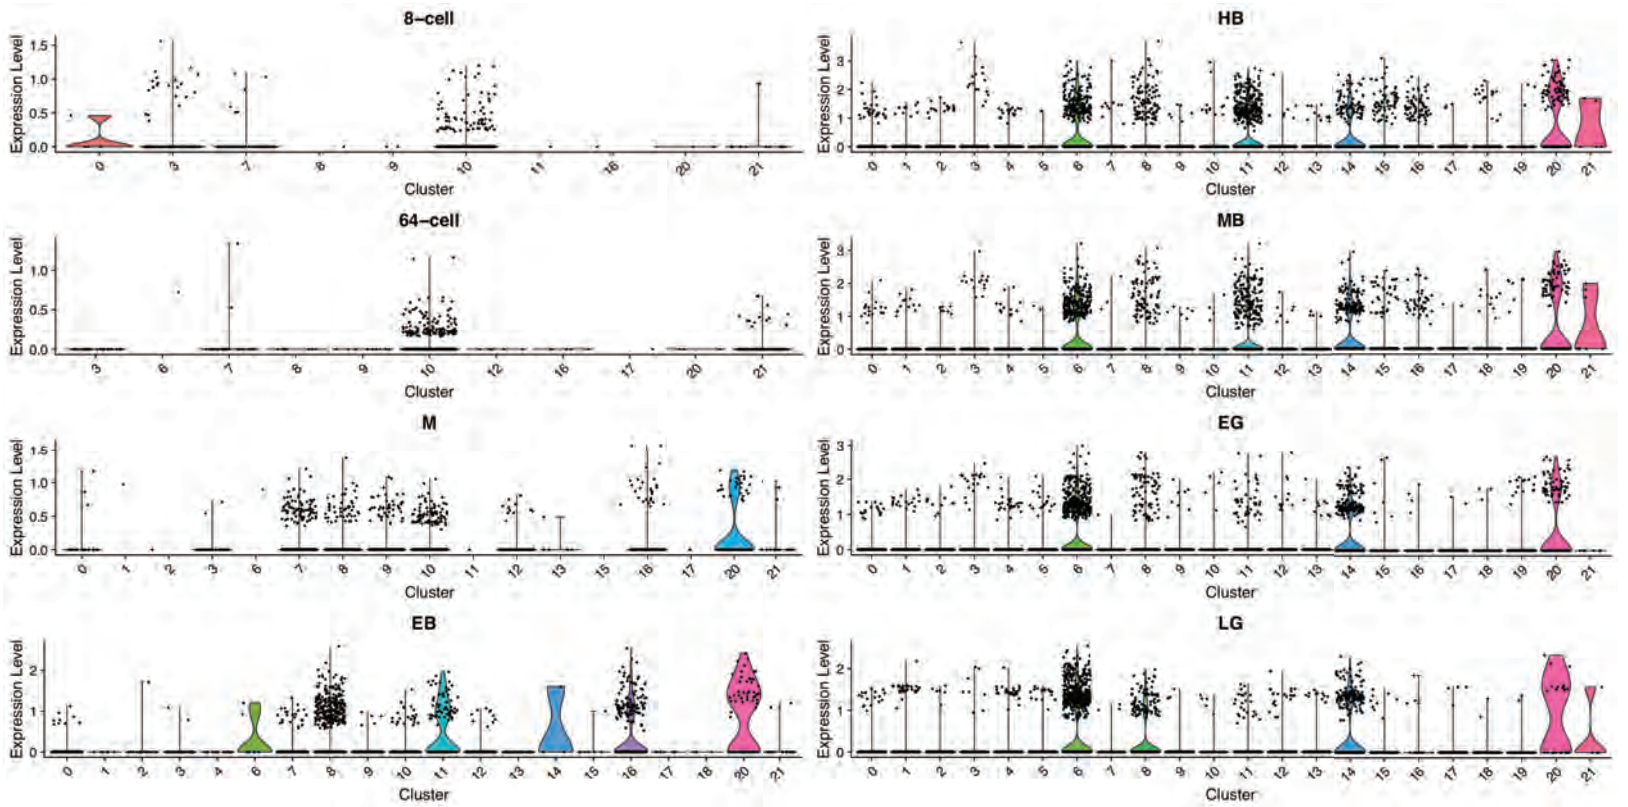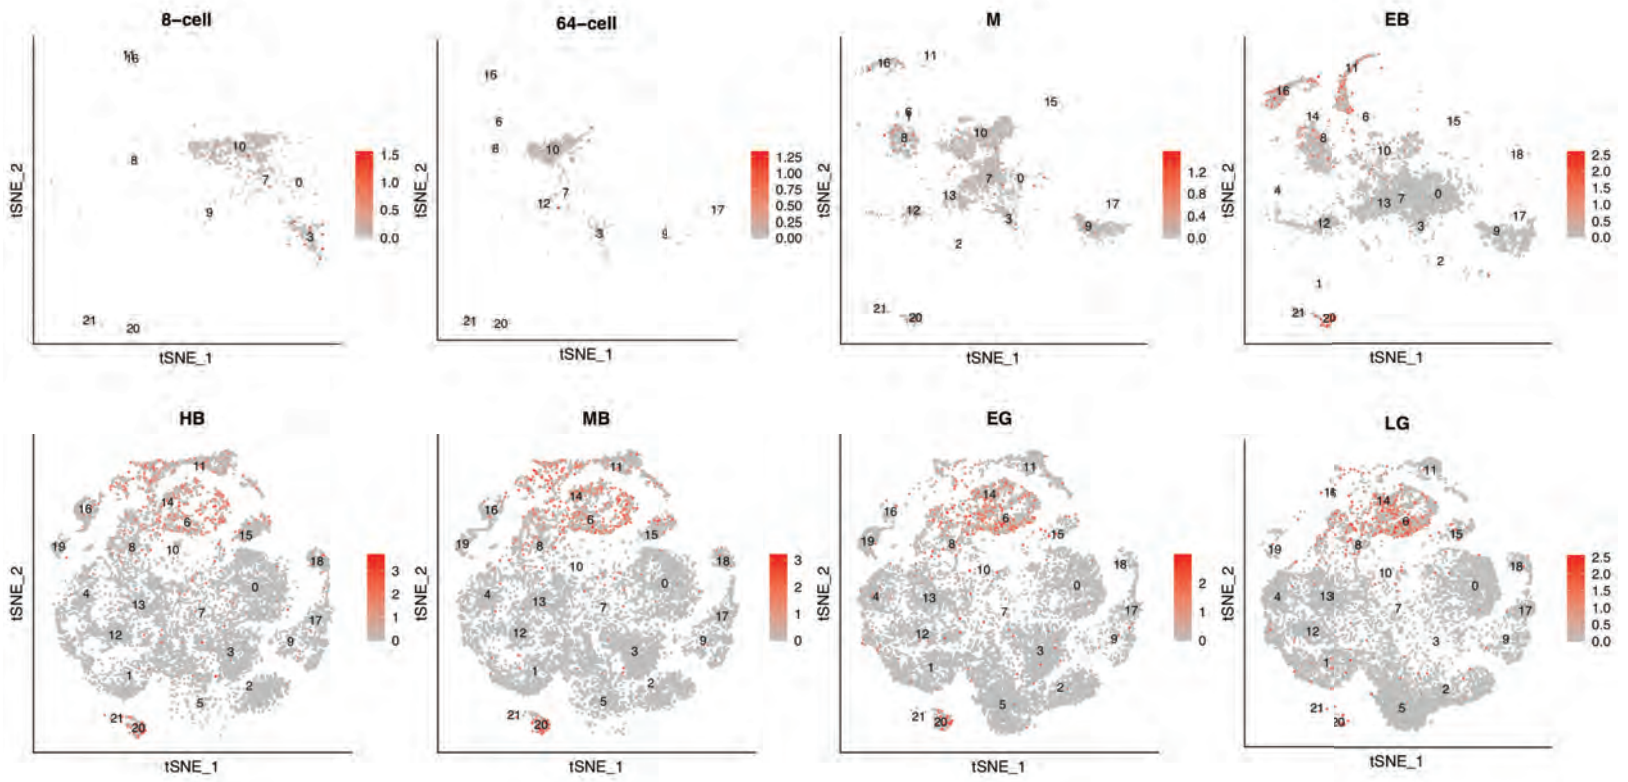

Fig. S19: Stauden

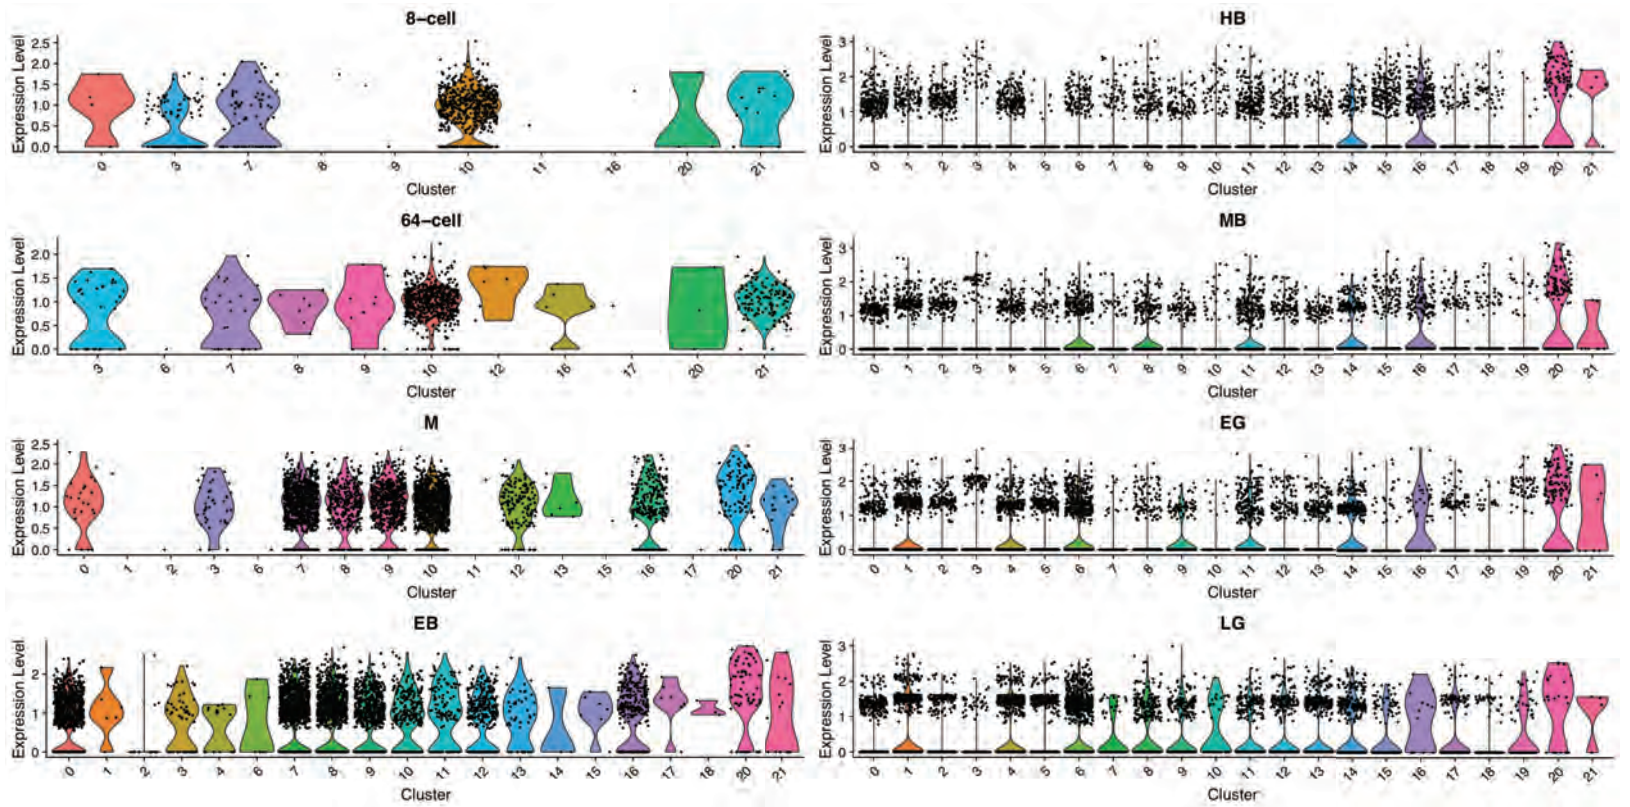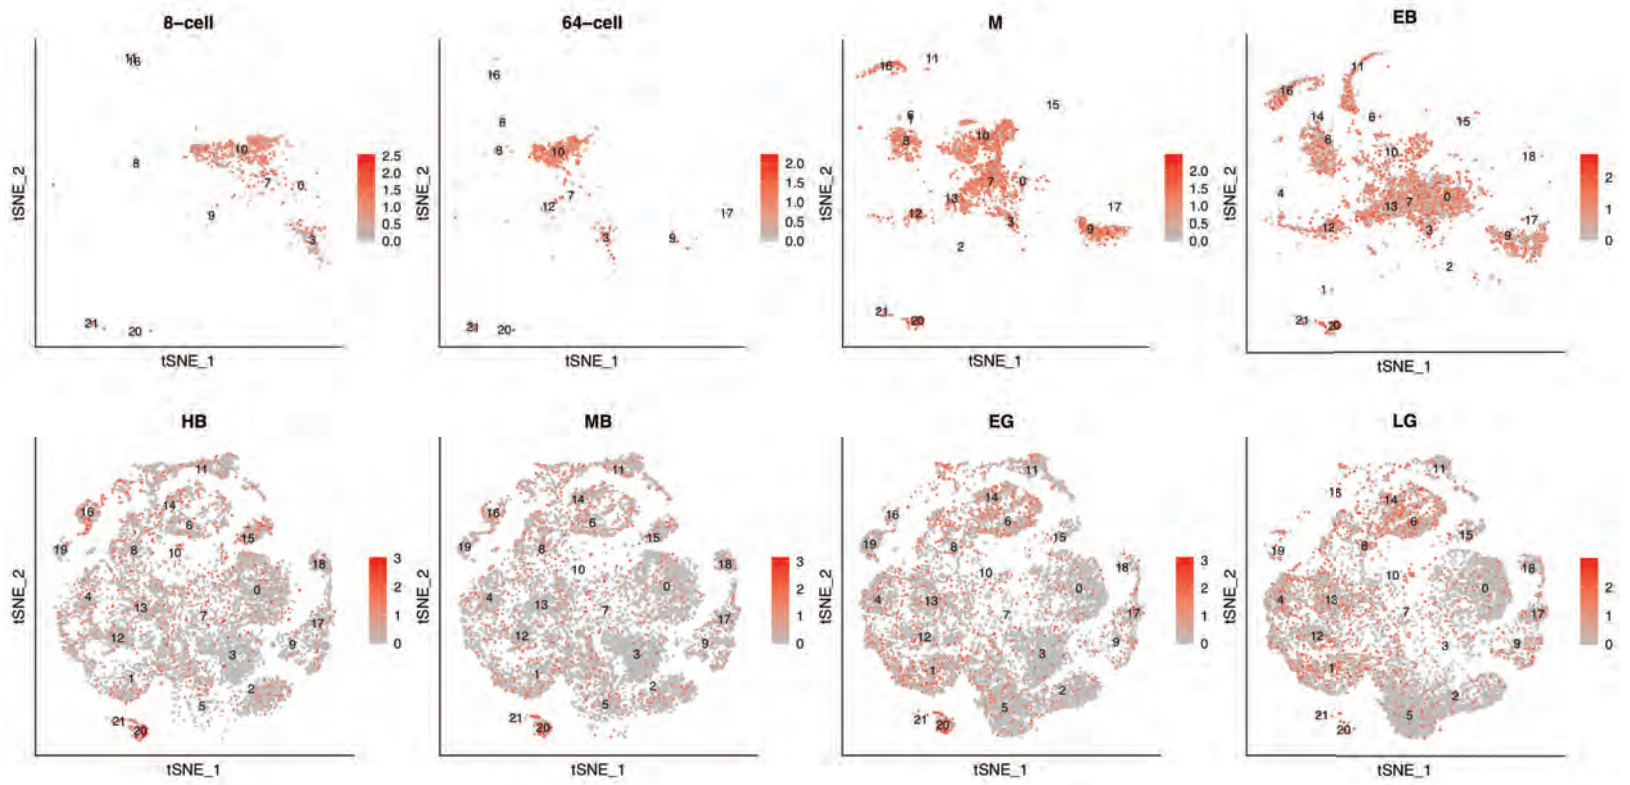

Fig. S20: Maelstrom

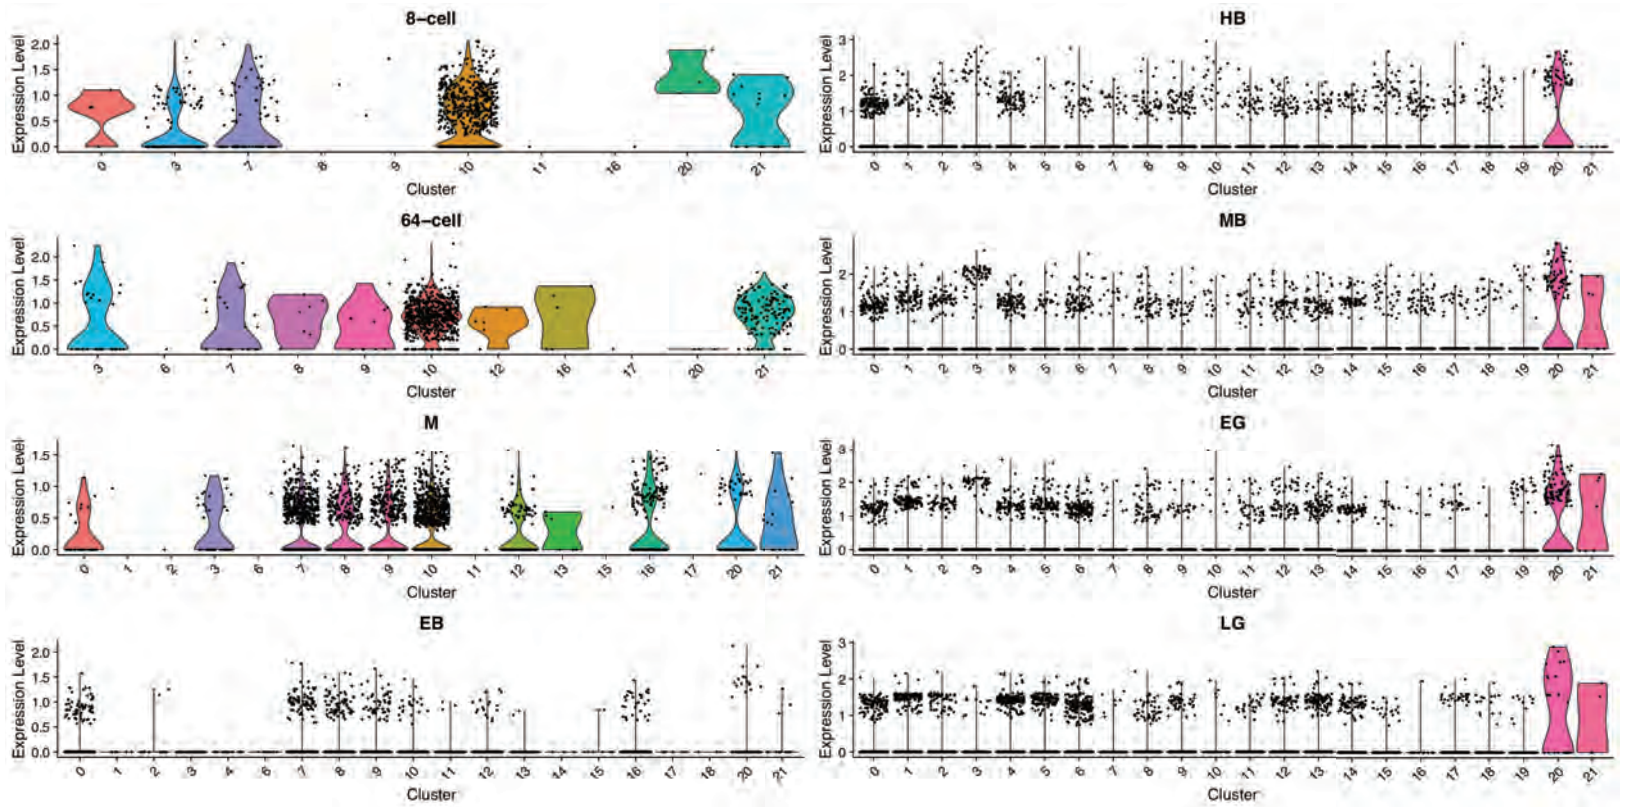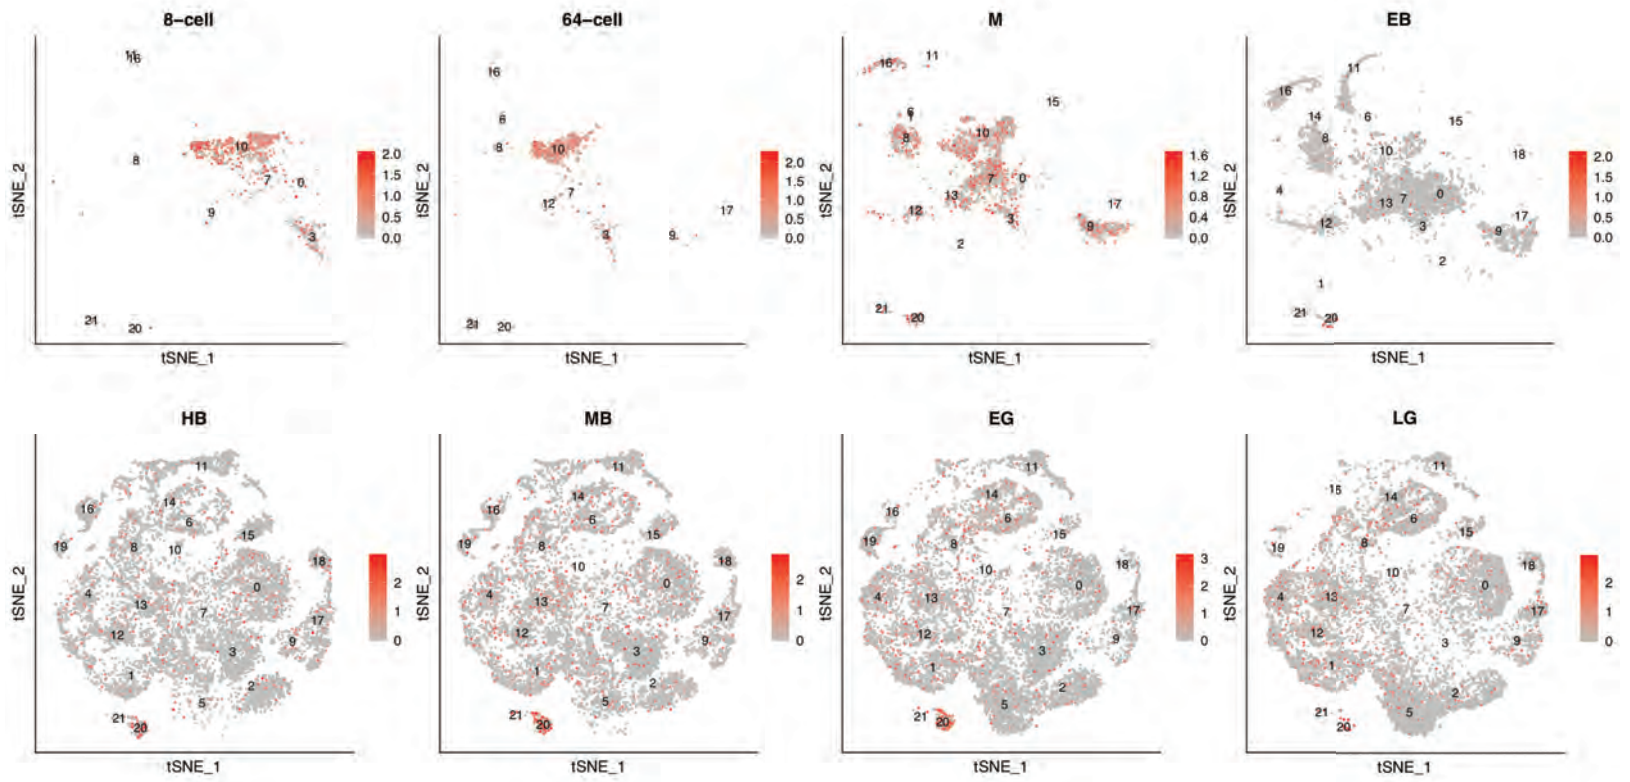



# Fig. S21: Gustavus

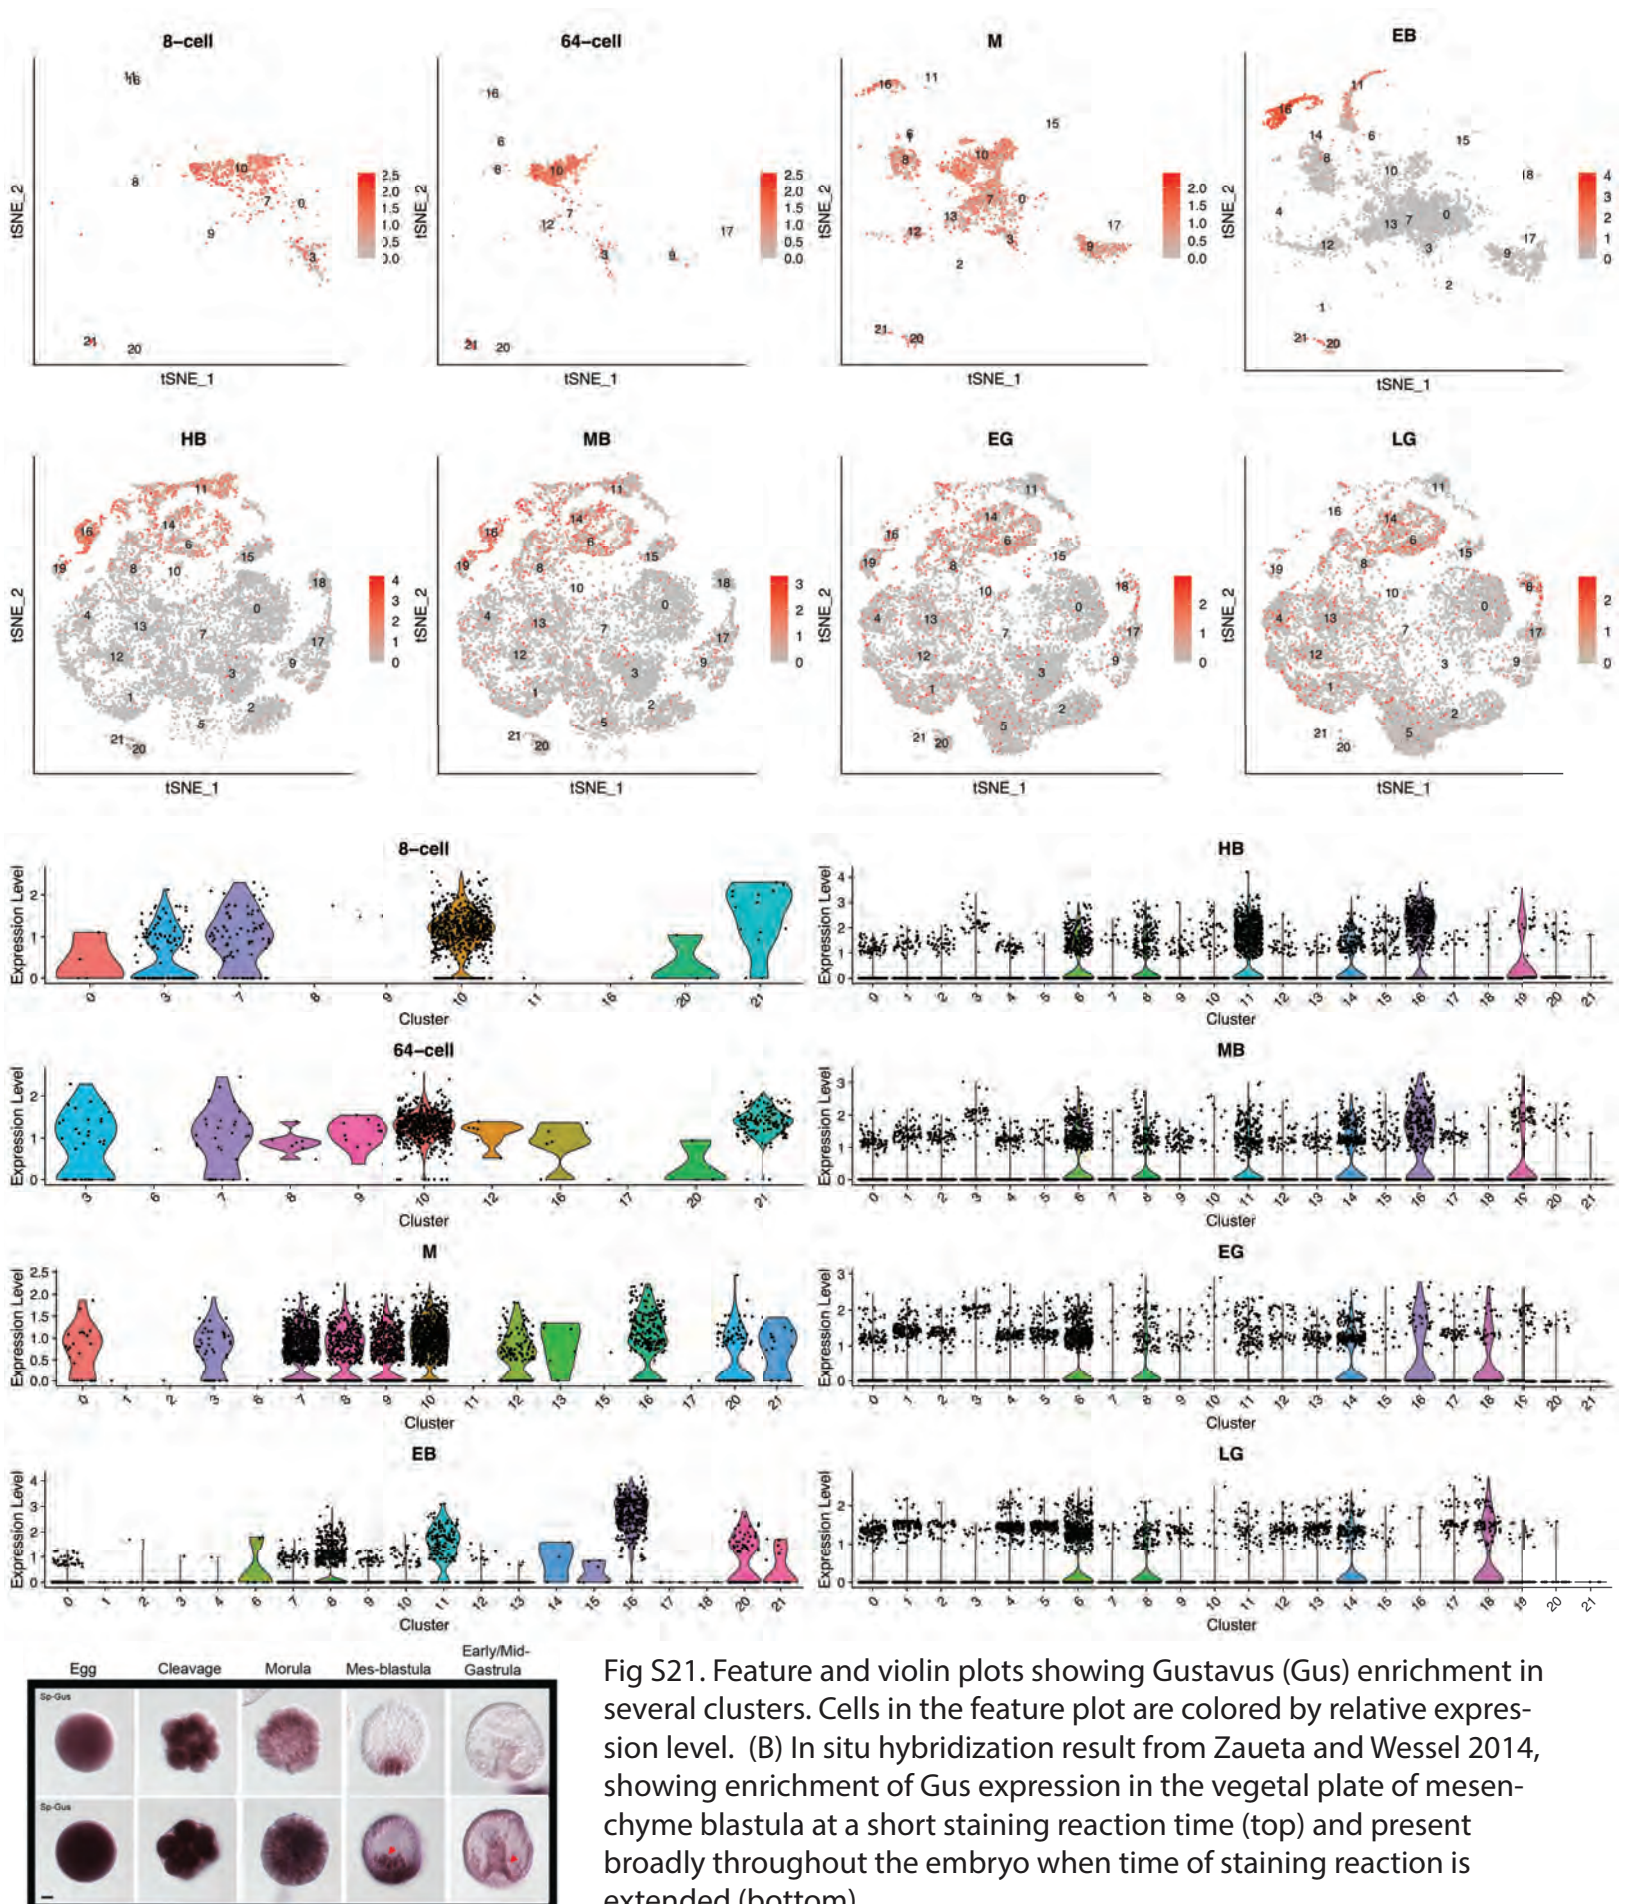

Fig S21. Feature and violin plots showing Gustavus (Gus) enrichment in several clusters. Cells in the feature plot are colored by relative expression level. (B) In situ hybridization result from Zaueta and Wessel 2014, showing enrichment of Gus expression in the vegetal plate of mesenchyme blastula at a short staining reaction time (top) and present broadly throughout the embryo when time of staining reaction is extended (bottom).

Fig. S22: FoxG

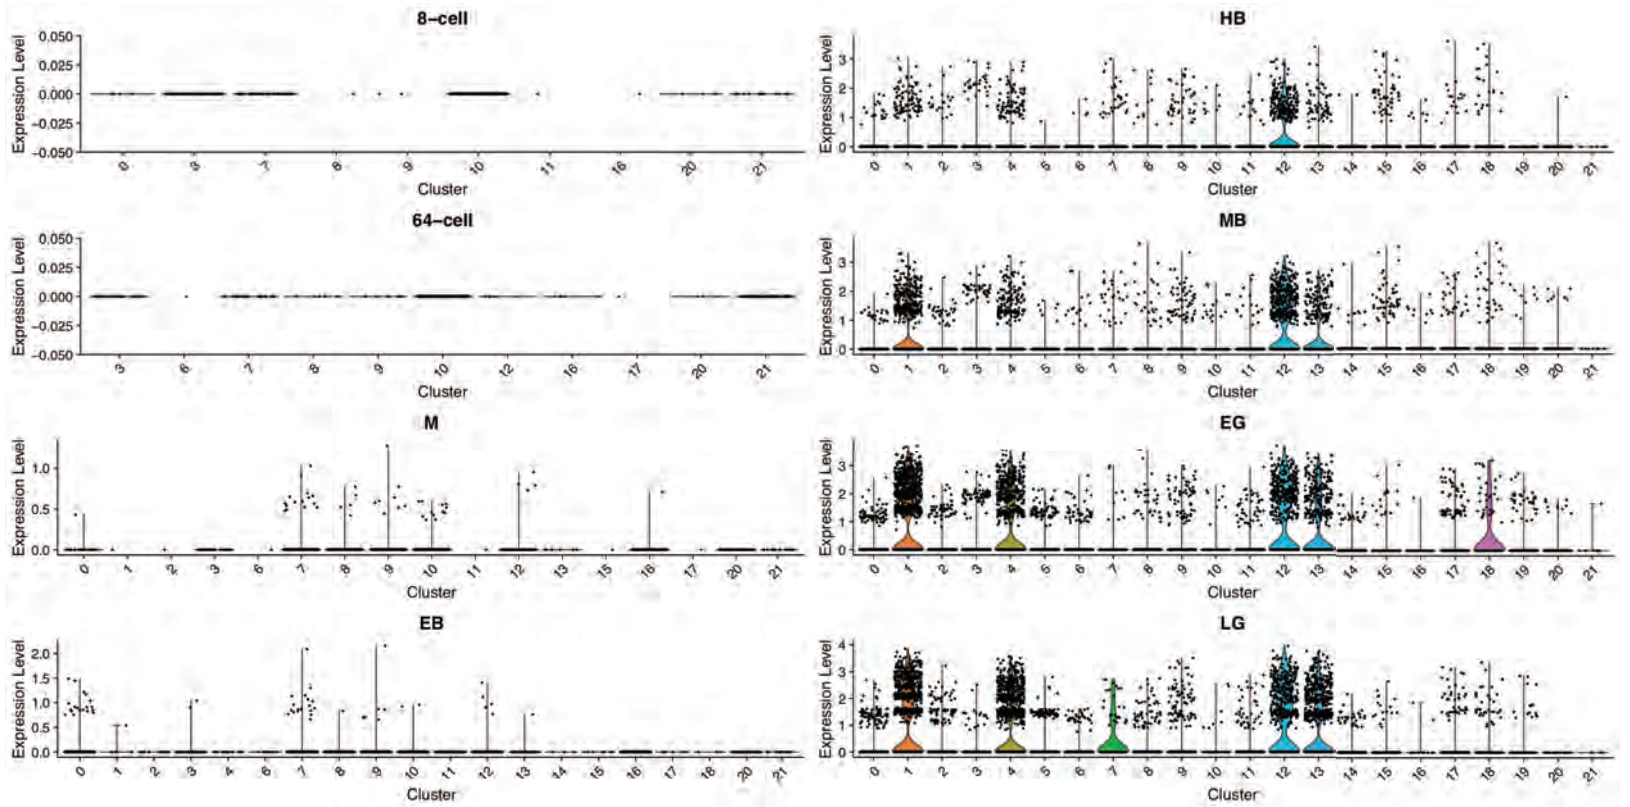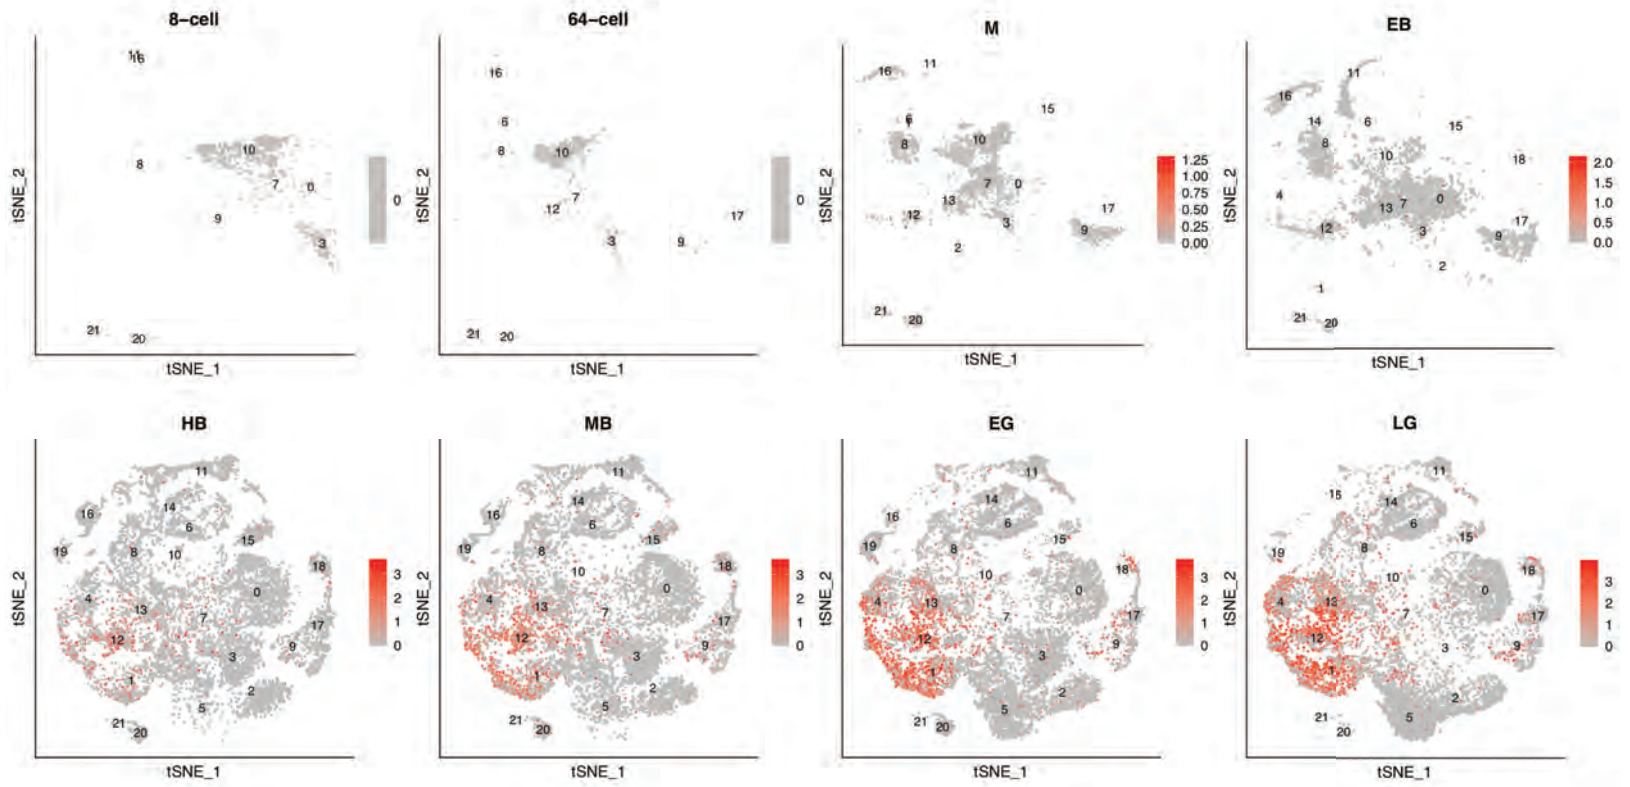

Fig. S23: CHR D

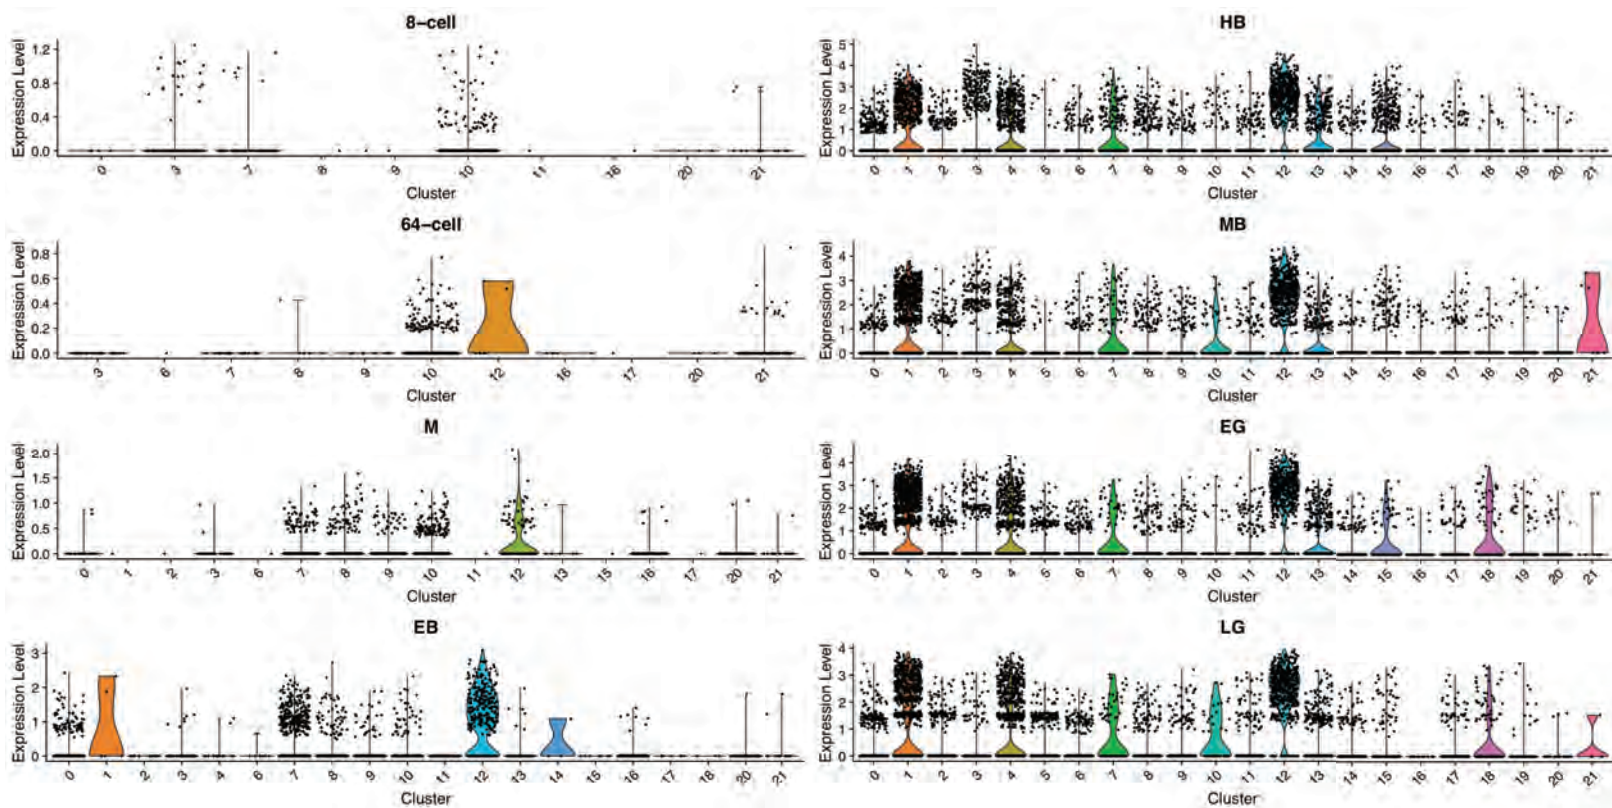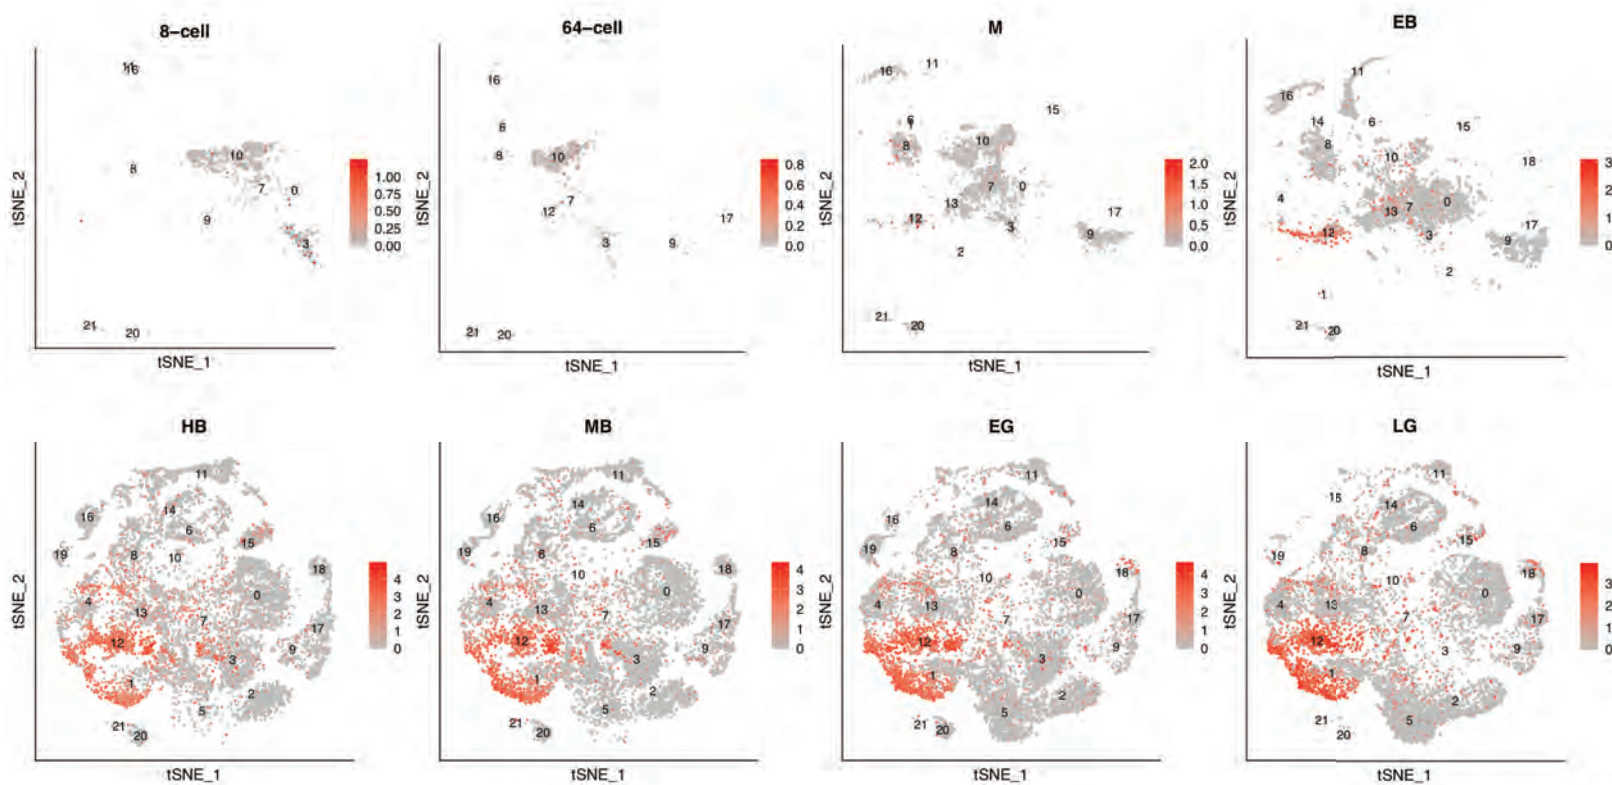

Fig. S24: Lim1

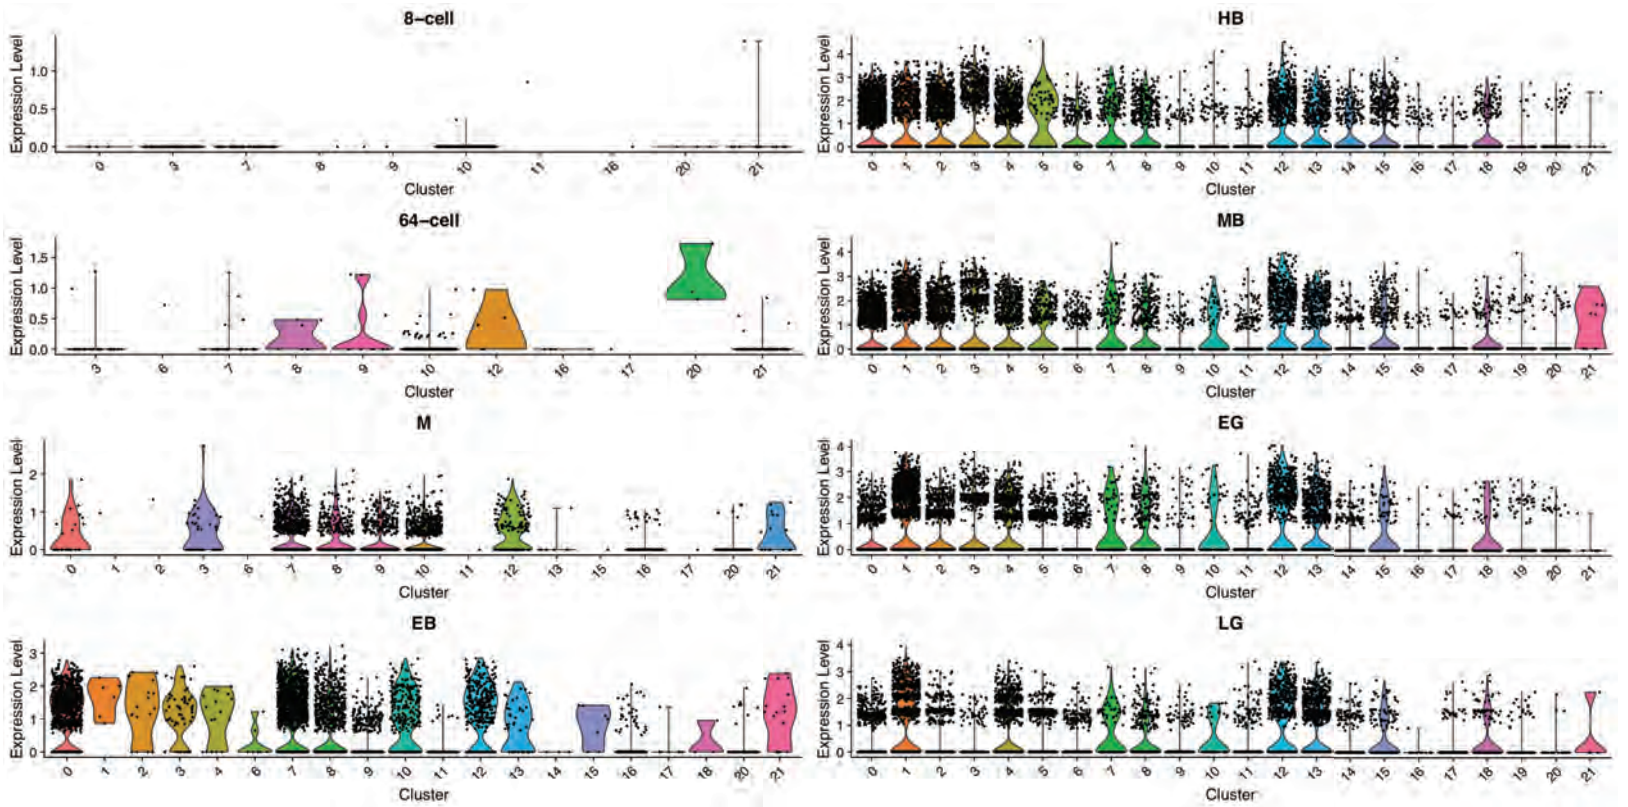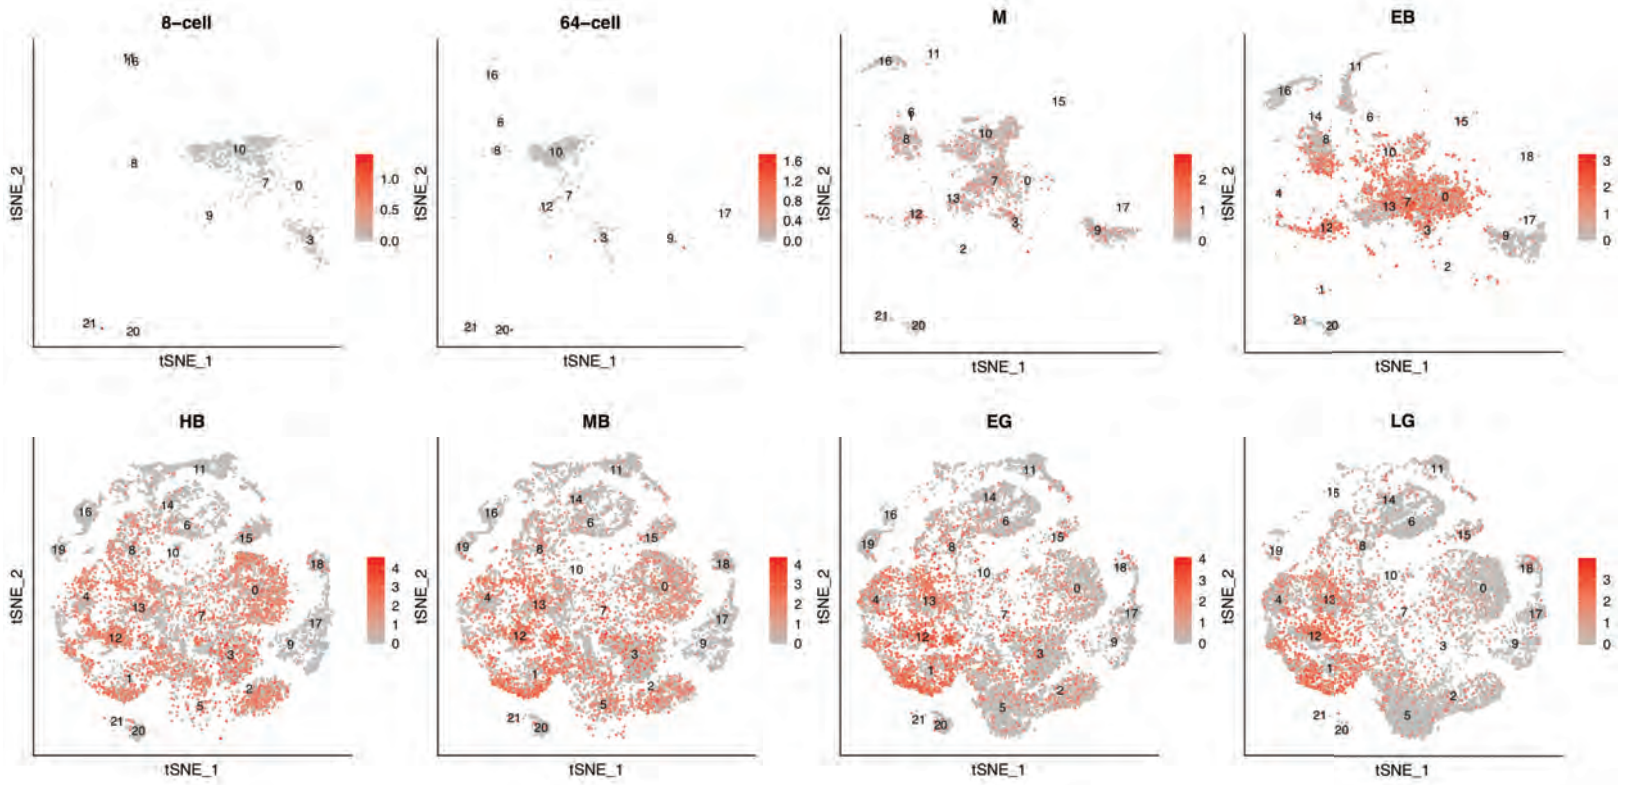

## Fig. S25

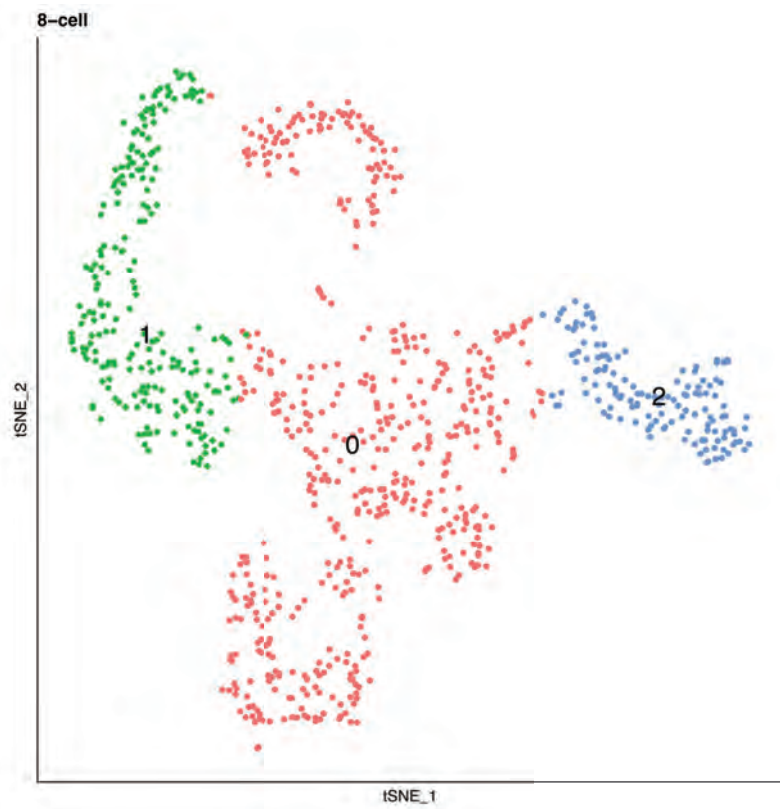

Fig. S25. tSNE plot of 8-cell stage, unintegrated dataset shows the 886 cells cluster into three major cell states. (Clustering parameters used were dims=4, res=0.1.)

Fig. S26

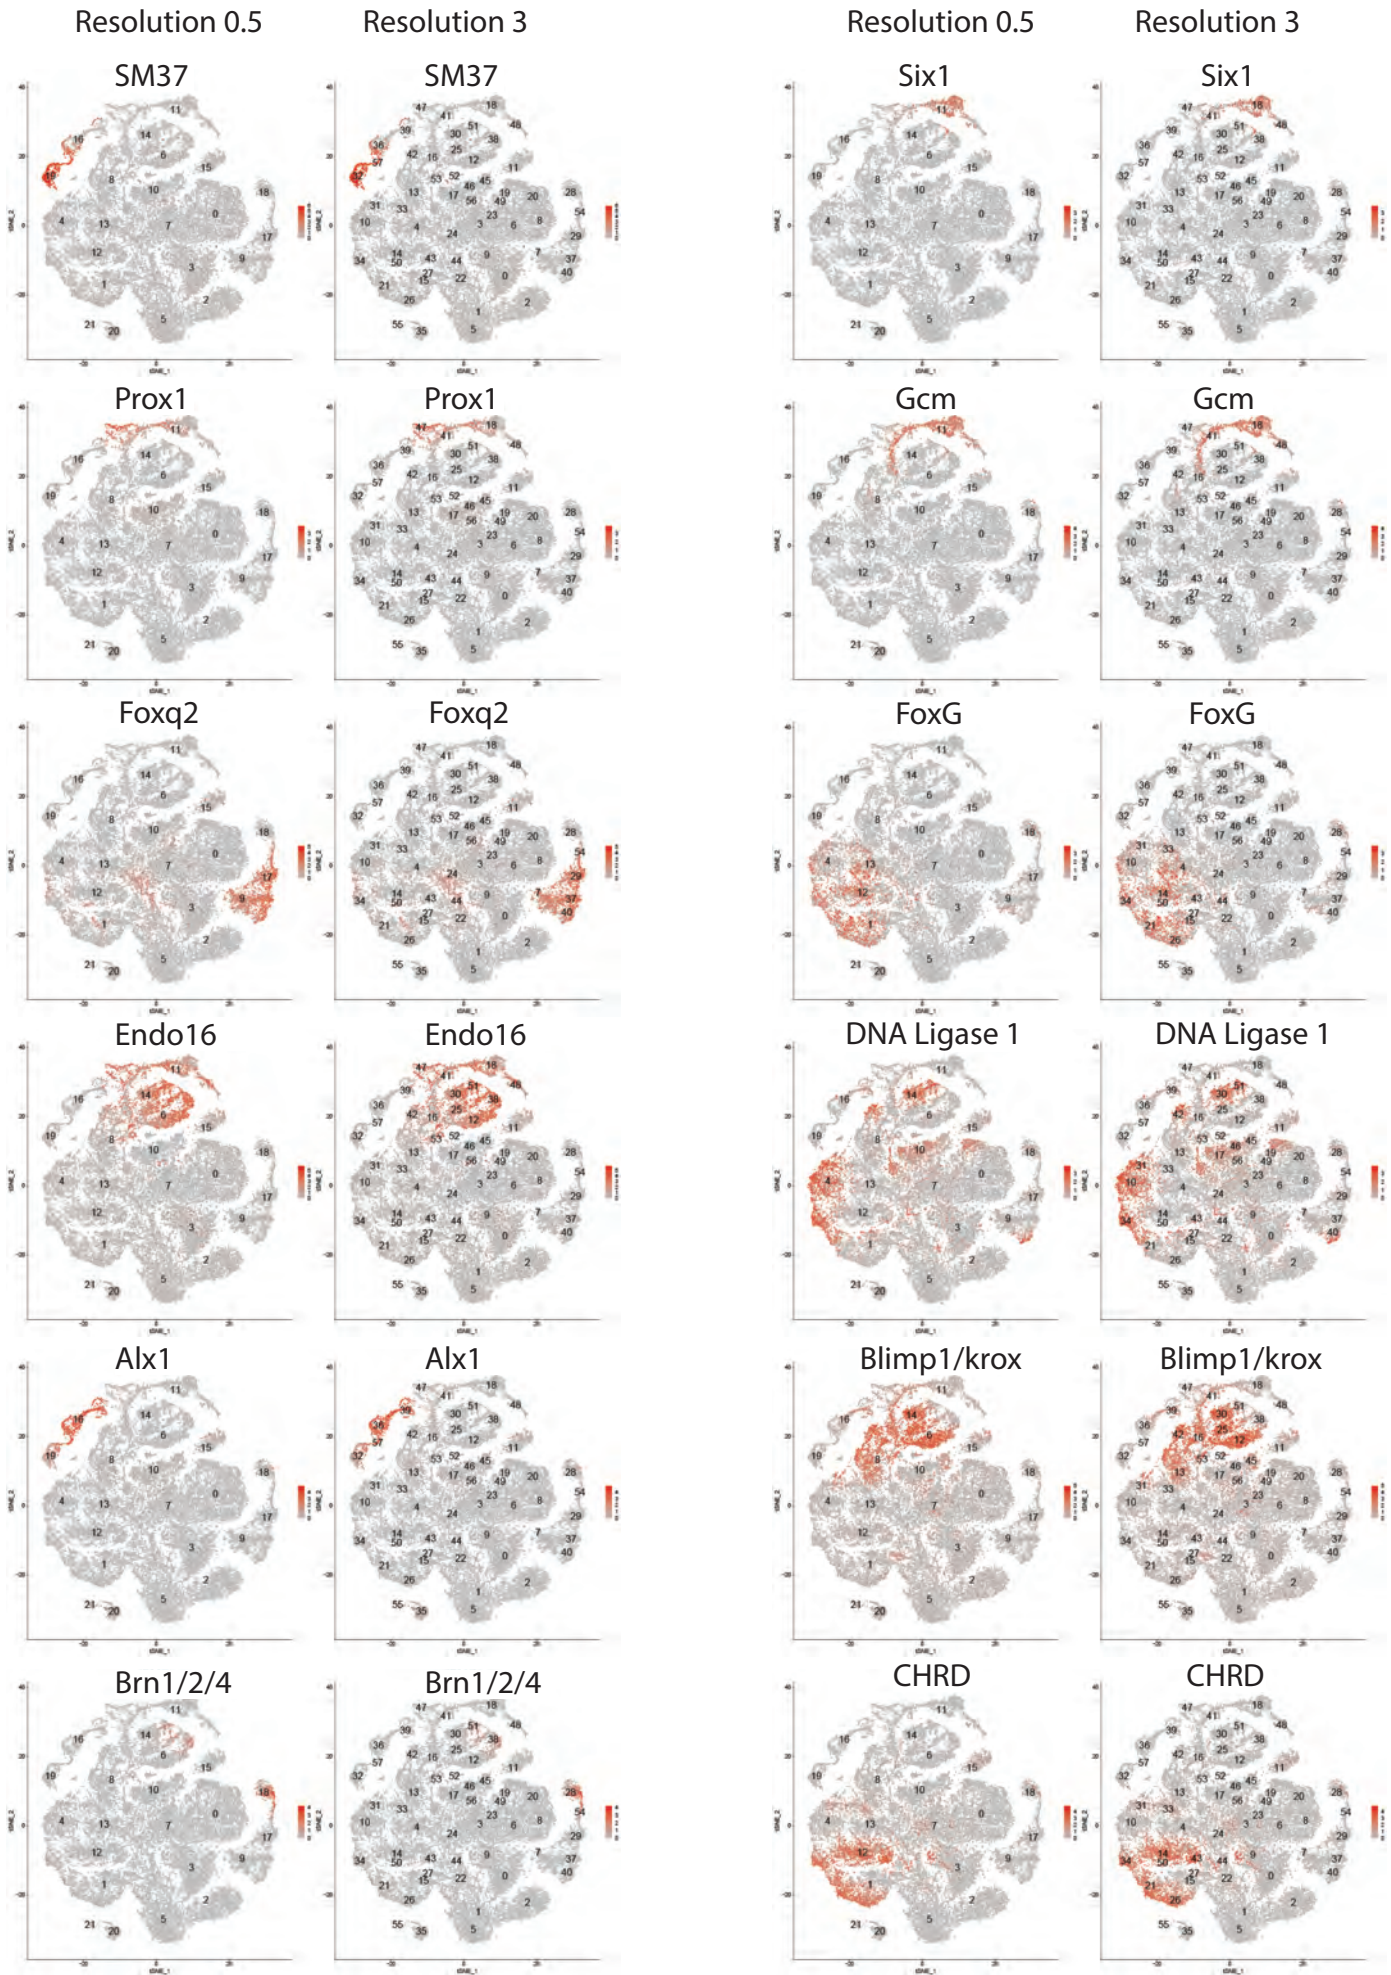

Fig. S26. Feature plots for several marker genes seen at a resolution of 0.5 and 3. Higher resolution differentiates subpopulations of the cell states identified at resolution 0.5. Foregut gene *Brn1/2/4* which is seen in some cells of cluster 14 and 6 (res=0.5) is enriched in clusters 51 and 38 (res=3).

## Fig. S27: Cyclin B

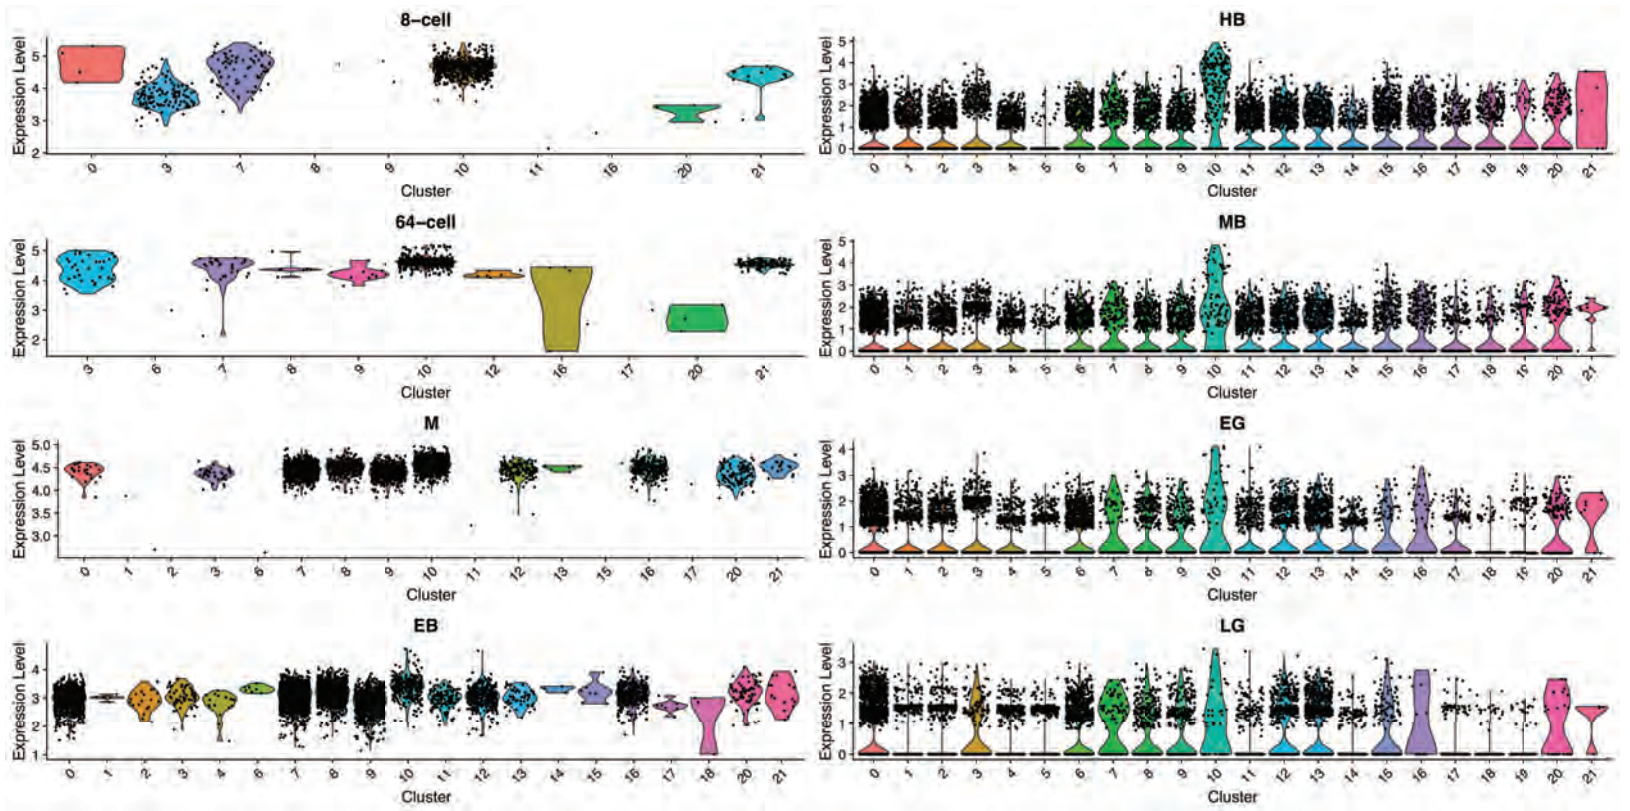

Fig. S27. Violin plots showing Cyclin B expression across different clusters at each developmental stage. Normalized gene expression values at log scale shown per cell cluster identity for each developmental time point. Plots depict probability density at different expression levels.
